# Supplementary material
Source: MDPI journal article supplement (https://www.mdpi.com/1996-1073/15/19/7240)
Supplement: s1 [file s1]

# Challenges in kinetic parameter determination for wheat straw pyrolysis

## Supplementary Information

Frederico G Fonseca<sup>1</sup>, Andrés Anca-Couce<sup>2</sup>, Axel Funke<sup>1</sup>, Nicolaus Dahmen<sup>1</sup>

✉ axel.funke@kit.edu

1: Institute of Catalysis Research and Technology (IKFT), Karlsruhe Institute of Technology (KIT), Hermann-von-Helmholtz-Platz 1, Building 727, 76344 Eggenstein-Leopoldshafen, Germany

2: Institute of Thermal Engineering, Graz University of Technology, Inffeldgasse 25b, 8010 Graz, Austria

3: Thermal and Fluids Engineering Department, Carlos III University of Madrid, Avda. de la Universidad 30, 28911 Leganés, Madrid, Spain

|                                                                 |             |
|-----------------------------------------------------------------|-------------|
| DECONVOLUTION.....                                              | V           |
| MODEL-FITTING.....                                              | IX          |
| ISOCONVERSIONAL METHODS.....                                    | XXI         |
| <i>Numerical values</i> .....                                   | <i>xxi</i>  |
| <i>Arrhenius Plots</i> .....                                    | <i>xxiv</i> |
| COMPARISON OF RESULTS – ISOCONVERSIONAL AND MODEL-FITTING ..... | XXVII       |
| REACTION NETWORKS.....                                          | XXIX        |

Table S1: TGA instrument characteristics (Netzsch STA-409). Source: #3, Table 3 at [4]

| Sensitivity ( $\mu\text{g}$ ) | Temperature accuracy (K) | Sample mass (mg) | Type     | N <sub>2</sub> purge flow (ml/min) | Sample holder | Calibration   |
|-------------------------------|--------------------------|------------------|----------|------------------------------------|---------------|---------------|
| 1                             | 1                        | ≈ 200            | Vertical | 70                                 | Alumina       | Melting point |

Table S2: Fundamentals of the thermogravimetric data (TGA/DTG) for the Beech wood powder samples.

| $\beta$ (K/min) | T peak DTG (°C) | T shoulder DTG (°C) | Initial mass (mg) | Char yield @ 900 °C (wt. %) | $\Delta m/\Delta T_{\max}$ (K <sup>-1</sup> ) | Kissinger Kinetics<br>R <sup>2</sup> = 0.99 |                                          | # Curves |
|-----------------|-----------------|---------------------|-------------------|-----------------------------|-----------------------------------------------|---------------------------------------------|------------------------------------------|----------|
|                 |                 |                     |                   |                             |                                               | E <sub>a</sub> (kJ/mol)                     | log <sub>10</sub> (A [s <sup>-1</sup> ]) |          |
| 1               | 322.9 ± 0.1     | 260.6 ± 0.5         | 99.7 ± 0.0        | 25.8 ± 1.1                  | 1.12 ± 0.00                                   | 218.48 ± 12.63                              | 16.15 ± 2.47                             | 2        |
| 5               | 345.1 ± 0.7     | 294.3 ± 0.9         | 99.9 ± 1.3        | 25.1 ± 0.1                  | 5.12 ± 0.00                                   |                                             |                                          | 2        |
| 10              | 354.9 ± 0.2     | 299.1 ± 0.6         | 99.9 ± 0.9        | 25.1 ± 0.1                  | 10.17 ± 0.05                                  |                                             |                                          | 2        |
| 20              | 368.3           | 312.2               | 108.3             | 24.8                        | 22.85                                         |                                             |                                          | 1        |

Table S3: Fundamentals of the thermogravimetric data (TGA/DTG) for the wheat straw powder (WS-P) samples.

| $\beta$ (K/min) | T peak DTG (°C) | Initial mass (mg) | Char yield @ 900 °C (wt. %) | $\Delta m/\Delta T_{\max}$ (K <sup>-1</sup> ) | Kissinger Kinetics<br>R <sup>2</sup> = 0.93 * |                                          | # Curves |
|-----------------|-----------------|-------------------|-----------------------------|-----------------------------------------------|-----------------------------------------------|------------------------------------------|----------|
|                 |                 |                   |                             |                                               | E <sub>a</sub> (kJ/mol)                       | log <sub>10</sub> (A [s <sup>-1</sup> ]) |          |
| 1               | 288.6 ± 0.5     | 211.9 ± 33.3      | 25.6 ± 0.5                  | 0.75 ± 0.00                                   | 220.21 ± 43.57                                | 17.41 ± 5.73                             | 2        |
| 5               | 310.9 ± 1.9     | 182.7 ± 1.0       | 26.9 ± 0.0                  | 3.84 ± 0.02                                   |                                               |                                          | 2        |
| 10              | 321.4 ± 1.0     | 224.2 ± 11.0      | 26.9 ± 0.0                  | 8.08 ± 0.02                                   |                                               |                                          | 5        |
| 20              | 334.6 ± 0.1     | 200.1 ± 14.3      | 26.3 ± 0.0                  | 17.83 ± 0.15                                  |                                               |                                          | 2        |
| 50              | 338.5 ± 0.2     | 180.2 ± 4.0       | 25.2 ± 0.0                  | 72.34 ± 0.31                                  |                                               |                                          | 2        |

\* The values from the 1 K/min curve were not considered to improve fit. Removing the 50 K/min curve (while keeping the 1 K/min curve), the values obtained are E<sub>a</sub> 121.78 ± 19.27, log<sub>10</sub>A: 8.51 ± 3.30, R<sup>2</sup>: 0.95.

Table S4: Fundamentals of the thermogravimetric data (TGA/DTG) for the wheat straw hull (WS-H) samples.

| $\beta$<br>(K/min) | T peak<br>DTG (°C) | Initial<br>mass (mg) | Char yield @<br>900 °C (wt. %) | $\Delta m/\Delta T_{\max}$<br>(K <sup>-1</sup> ) | Kissinger Kinetics<br>R <sup>2</sup> = 0.85 * |                                             | # Curves |
|--------------------|--------------------|----------------------|--------------------------------|--------------------------------------------------|-----------------------------------------------|---------------------------------------------|----------|
|                    |                    |                      |                                |                                                  | E <sub>a</sub><br>(kJ/mol)                    | log <sub>10</sub> (A<br>[s <sup>-1</sup> ]) |          |
| 1                  | 287.9              | 195.6                | 25.7                           | 0.70                                             | 222.04 ±<br>53.83                             | 17.90 ±<br>6.85                             | 1        |
| 5                  | 300.7              | 216.8                | 26.7                           | 2.63                                             |                                               |                                             | 1        |
| 10                 | 319.5              | 183.7                | 26.7                           | 7.62                                             |                                               |                                             | 1        |
| 20                 | 326.7 ± 1.4        | 169.2 ± 5.4          | 25.8 ± 0.0                     | 15.59 ± 0.14                                     |                                               |                                             | 2        |
| 50                 | 321.5 ± 2.5        | 191.4 ± 4.9          | 24.7 ± 0.1                     | 67.51 ± 2.36                                     |                                               |                                             | 2        |

\* Removing the 50 K/min curve, the values obtained are E<sub>a</sub> 187.81 ± 34.00, log<sub>10</sub>A: 14.67 ± 4.89, R<sup>2</sup>: 0.94.

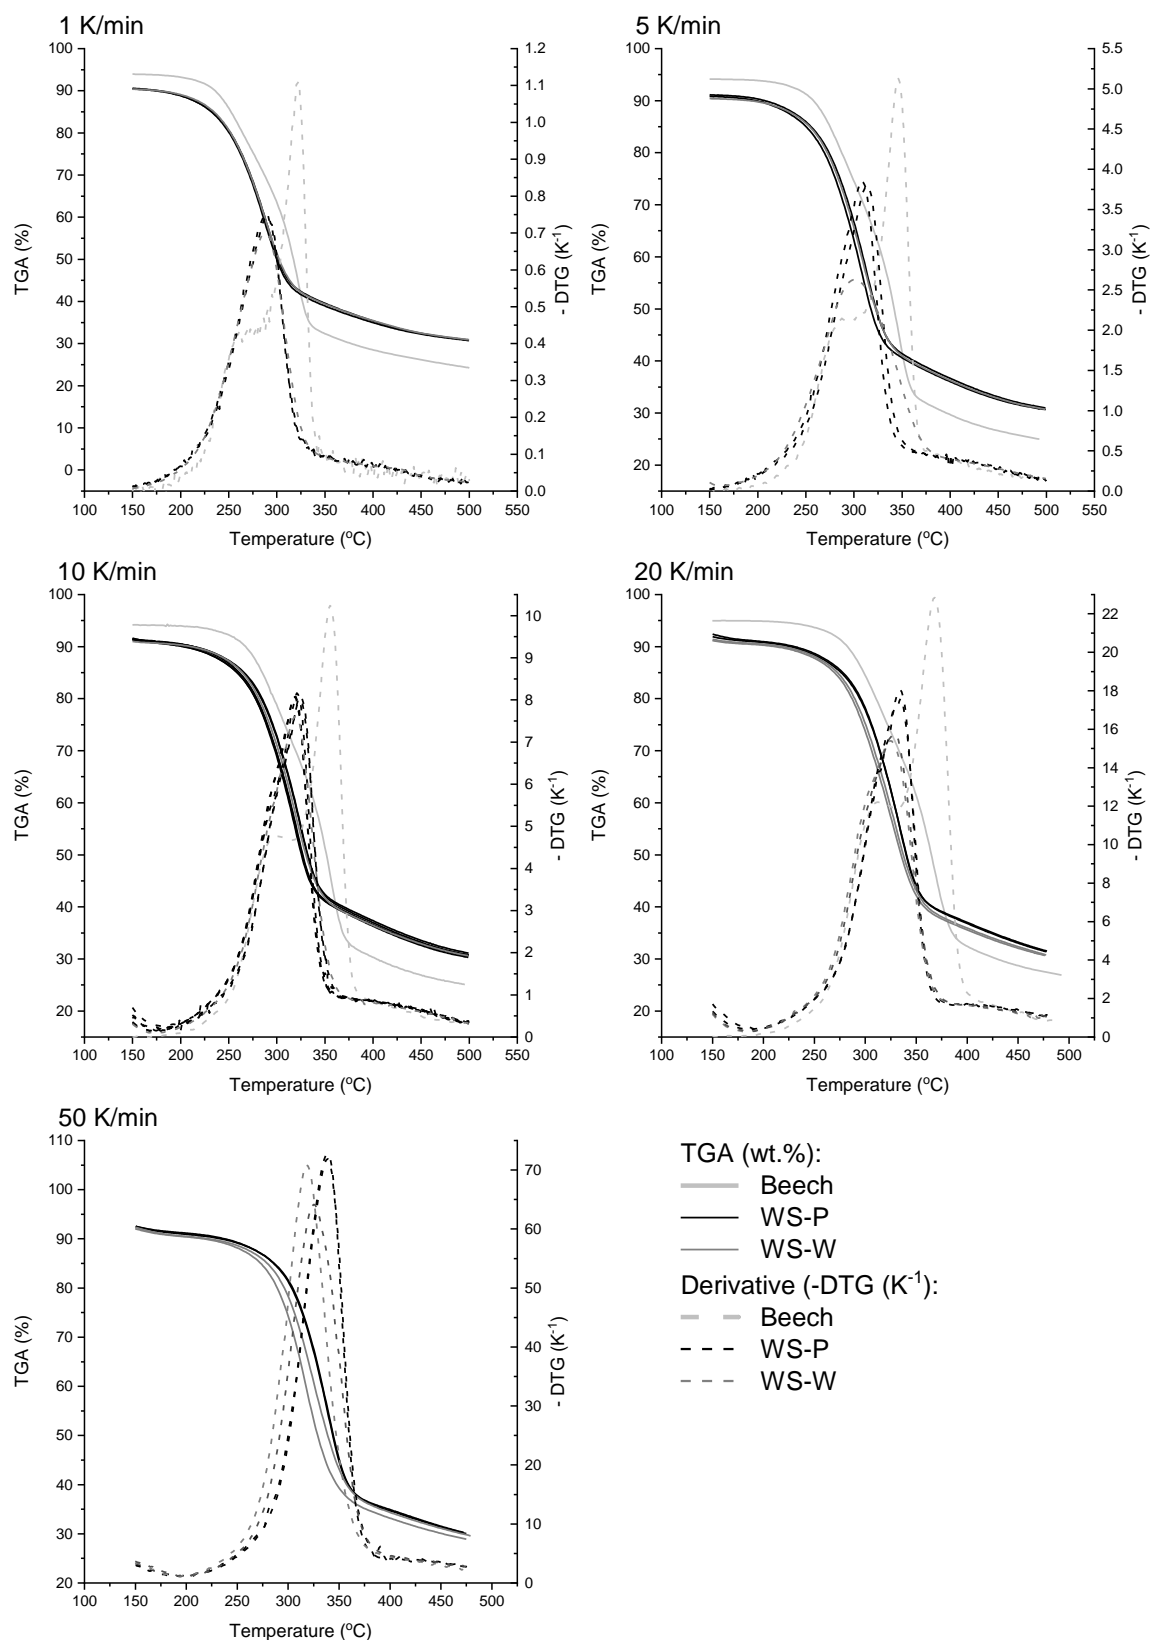

Figure S1: Comparison of the behavior of the mass loss profiles for the different samples at the different heating rates tested.

## Deconvolution

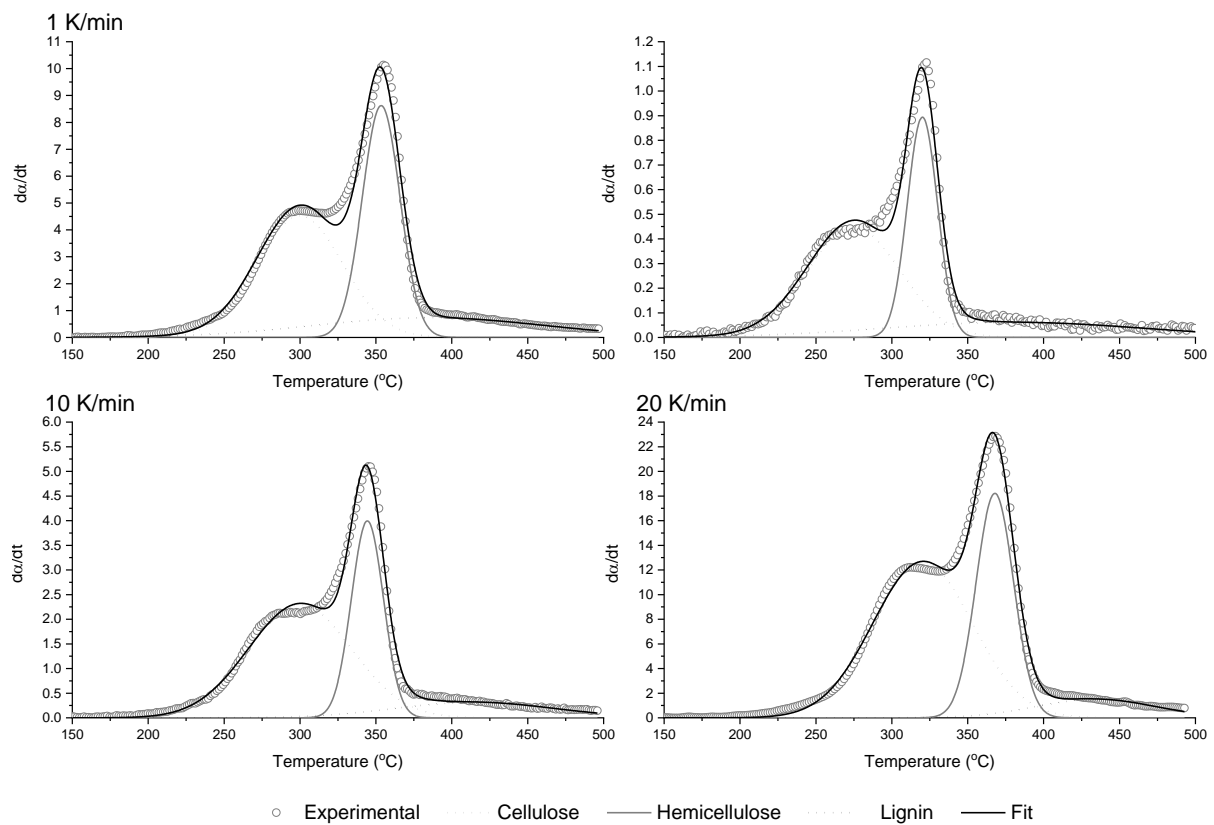

Figure S2: DTG Deconvolution for Beech.

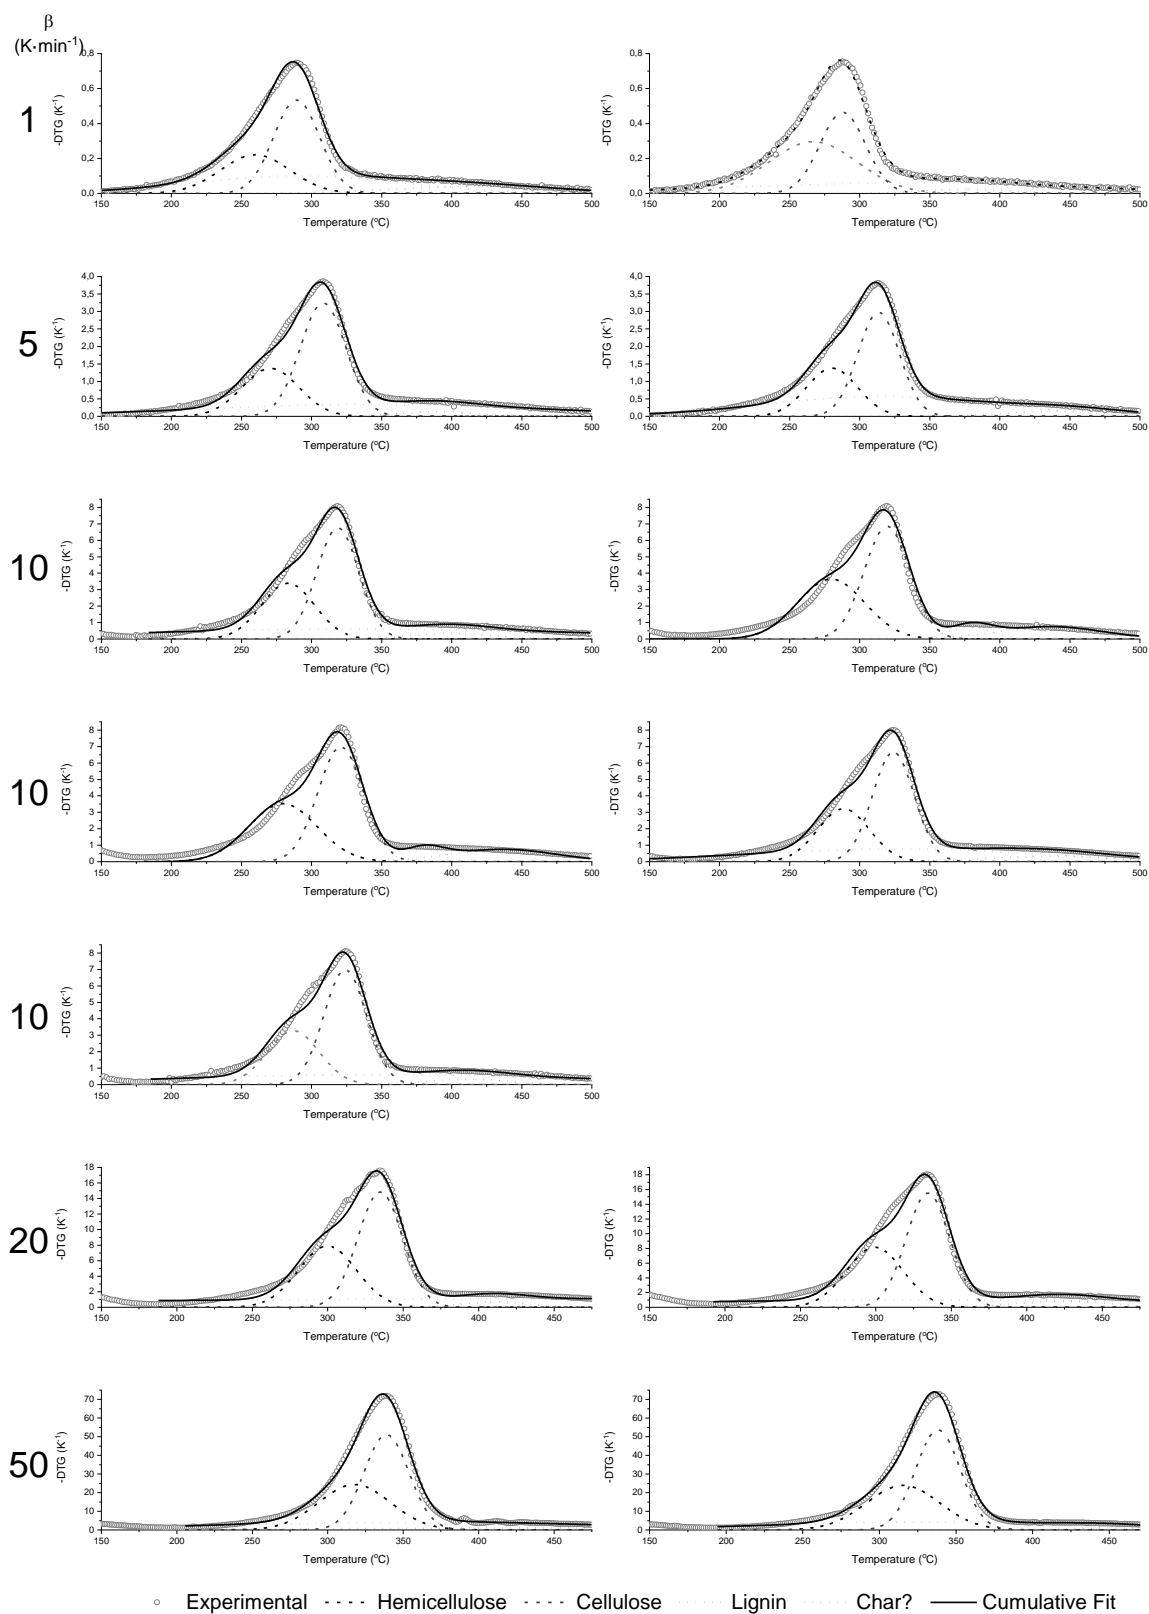

Figure S3: DTG Deconvolution for WS-P.

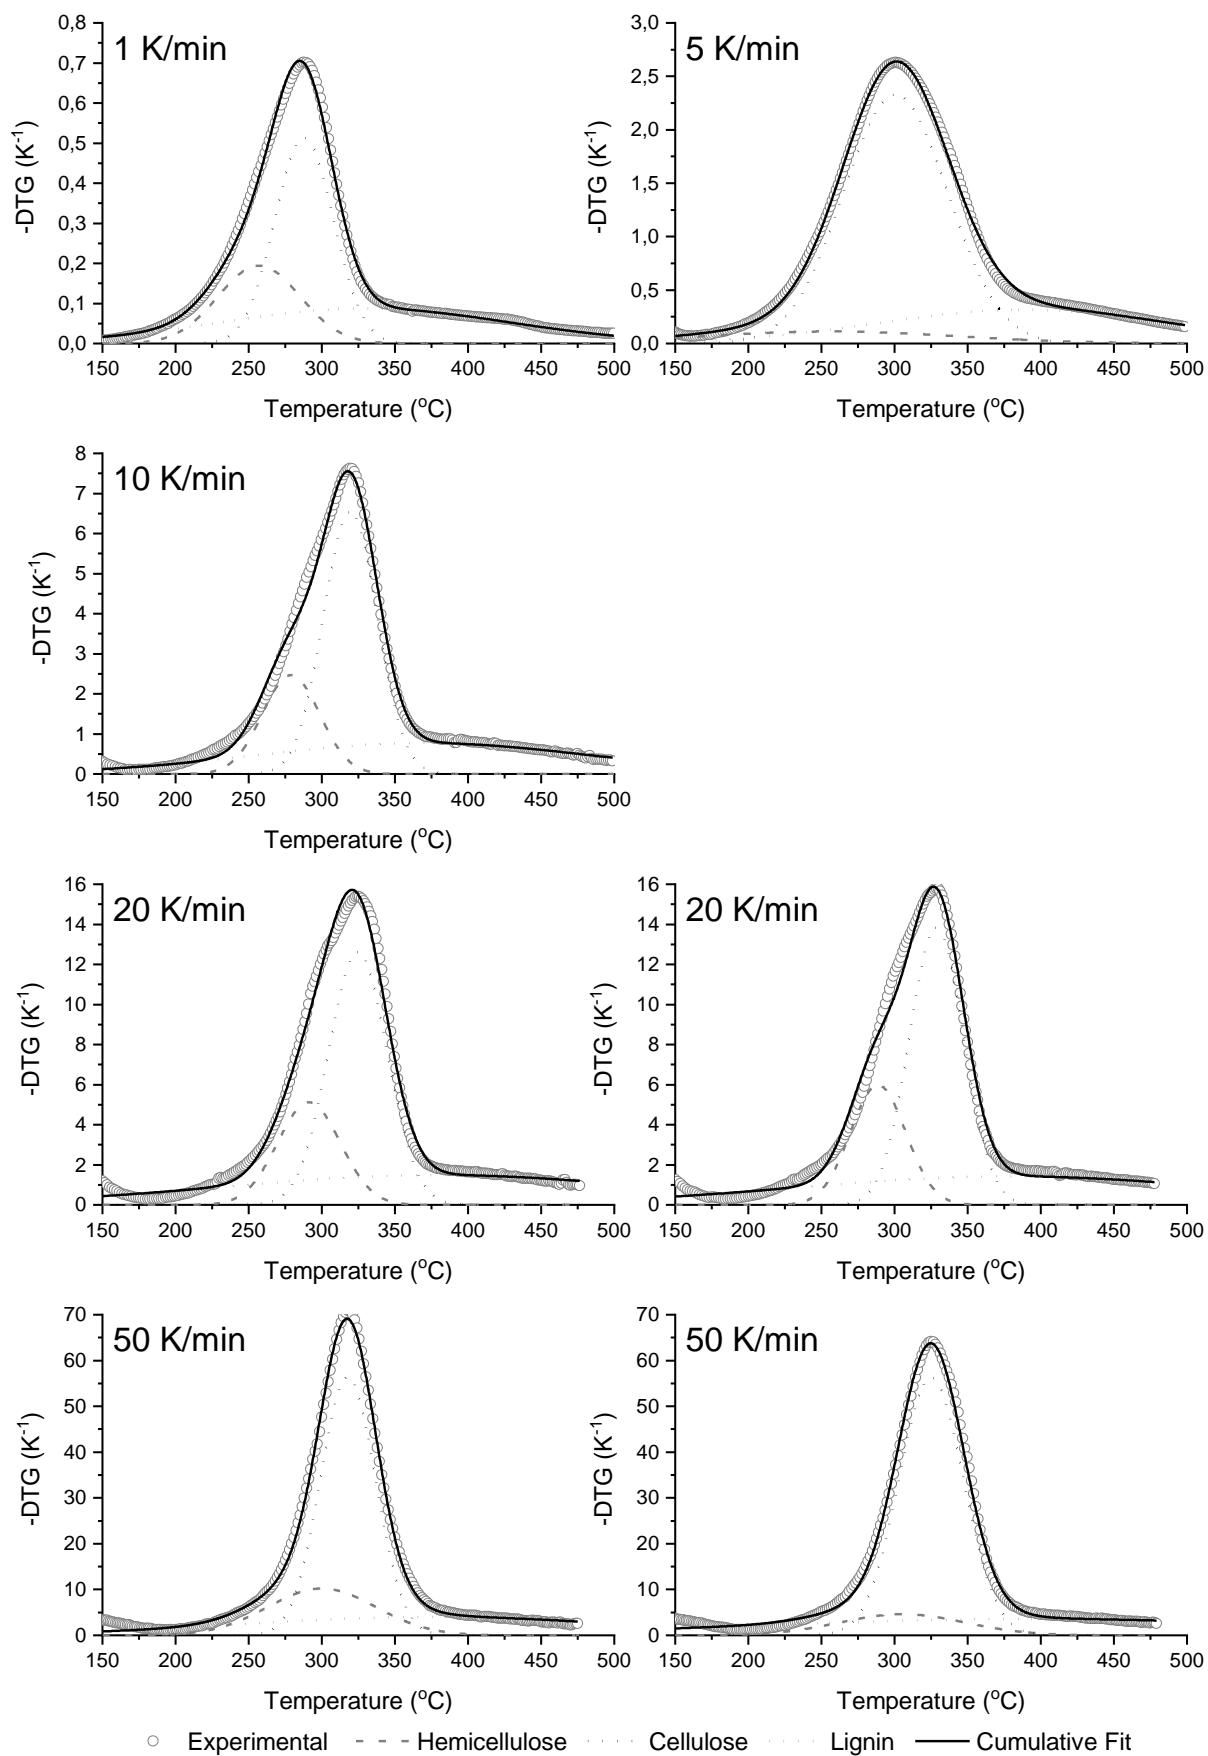

Figure S4: DTG Deconvolution for WS-H.

# Kinetic parameter determination for wheat straw pyrolysis – Supplementary Information

Table S5: Lignocellulosic composition of the different materials, obtained using Gaussian deconvolution procedures (wt.%, dab., extractives-free). Values disregarded to estimate the total average are in *italic*.

| $\beta$ (K/min)               | Beech              |                   |                    |                | WS-P          |            |            |                | WS-H              |                   |                   |                    |
|-------------------------------|--------------------|-------------------|--------------------|----------------|---------------|------------|------------|----------------|-------------------|-------------------|-------------------|--------------------|
|                               | Hemicellulose      | Cellulose         | Lignin             | R <sup>2</sup> | Hemicellulose | Cellulose  | Lignin     | R <sup>2</sup> | Hemicellulose     | Cellulose         | Lignin            | R <sup>2</sup>     |
| <b>1</b>                      | <i>44.7 ± 17.1</i> | <i>34.1 ± 2.2</i> | <i>21.2 ± 19.4</i> | <i>0.92</i>    | 31.0 ± 0.6    | 33.0 ± 0.5 | 36.0 ± 0.5 | 1.00 ± 0.00    | 22.4 ± 0.4        | 42.2 ± 0.4        | 35.0 ± 0.6        | 1.00               |
| <b>5</b>                      | 45.6 ± 2.5         | 33.3 ± 0.9        | 21.1 ± 2.5         | 0.99           | 23.5 ± 1.1    | 38.5 ± 1.7 | 38.0 ± 0.5 | 0.99 ± 0.00    | <i>7.9 ± 0.8</i>  | <i>67.0 ± 0.6</i> | <i>25.2 ± 0.8</i> | <i>1.00</i>        |
| <b>10</b>                     | 47.0 ± 3.9         | 36.0 ± 0.9        | 17.0 ± 4.7         | 0.99           | 24.1 ± 0.7    | 37.8 ± 0.6 | 38.1 ± 2.3 | 0.98 ± 0.00    | 18.9 ± 0.4        | 46.8 ± 0.4        | 34.3 ± 1.0        | 1.00               |
| <b>20</b>                     | 48.9 ± 1.3         | 36.4 ± 0.8        | 14.7 ± 1.8         | 0.99           | 24.0 ± 0.6    | 35.6 ± 0.5 | 40.4 ± 0.4 | 0.99 ± 0.00    | 19.3 ± 0.5        | 44.0 ± 0.5        | 36.8 ± 1.7        | 0.99 ± 0.00        |
| <b>50</b>                     |                    |                   |                    |                | 29.3 ± 0.5    | 37.1 ± 0.4 | 33.6 ± 1.6 | 1.00 ± 0.00    | <i>14.3 ± 0.8</i> | <i>56.6 ± 0.6</i> | <i>29.0 ± 1.5</i> | <i>1.00 ± 0.00</i> |
| <b>Average</b>                | 47.1 ± 2.8         | 35.3 ± 0.9        | 17.6 ± 3.3         |                | 26.4 ± 1.1    | 36.4 ± 1.3 | 37.2 ± 0.4 |                | 20.2 ± 0.4        | 44.3 ± 0.4        | 35.5 ± 0.7        |                    |
| <b>Reference <sup>a</sup></b> | 34.3 ± 1.9         | 45.0 ± 5.4        | 20.7 ± 2.7         |                | 32.6 ± 0.7    | 45.5 ± 1.4 | 21.9 ± 1.0 |                | 32.6 ± 0.7        | 45.5 ± 1.4        | 21.9 ± 1.0        |                    |

a: Based on data obtained in the Phyllis2 database ([www.phyllis.nl](http://www.phyllis.nl)). Using 14 sources for wheat straw data and 3 for beech wood data.

Table S6: Comparison of replicas (WS-P, 10 K/min), obtained using Gaussian deconvolution procedures (wt.%, dab., extractives-free).

| Replicas       | Hemicellulose | Cellulose  | Lignin     | R <sup>2</sup> |
|----------------|---------------|------------|------------|----------------|
| <b>R1</b>      | 24.4 ± 0.6    | 37.1 ± 0.5 | 38.4 ± 1.6 | 0.99           |
| <b>R2</b>      | 26.1 ± 0.9    | 38.1 ± 0.8 | 35.7 ± 2.8 | 0.98           |
| <b>R3</b>      | 23.9 ± 0.8    | 38.0 ± 0.7 | 38.1 ± 2.9 | 0.98           |
| <b>R4</b>      | 23.7 ± 0.5    | 37.2 ± 0.5 | 39.2 ± 1.5 | 0.99           |
| <b>R5</b>      | 22.5 ± 0.6    | 38.7 ± 0.6 | 38.8 ± 2.0 | 0.99           |
| <b>Average</b> | 24.1 ± 0.7    | 37.8 ± 0.6 | 38.1 ± 2.3 |                |



## Model-fitting

Table S7: Results of the model fitting for Beech, obtained by simultaneous fitting to all thermograms.

|                           | First-order     |                 |                 | fit % *     |
|---------------------------|-----------------|-----------------|-----------------|-------------|
|                           | Cellulose       | Hemicellulose   | Lignin          | 3.9% ± 2.0% |
| $\log_{10} (A [s^{-1}])$  | 14.55           | 10.41           | 1.60            |             |
| $E_a [kJ \cdot mol^{-1}]$ | 198.4           | 136.3           | 58.2            |             |
| $c_i$                     | 54.7%           | 28.2%           | 17.1%           |             |
| $T_p$                     | 318.70 - 366.20 | 257.07 - 314.69 | 324.31 - 492.14 |             |
|                           | $n_{Lig}=3$     |                 |                 | fit % *     |
|                           | Cellulose       | Hemicellulose   | Lignin          | 3.5% ± 1.4% |
| $\log_{10} (A [s^{-1}])$  | 15.44           | 10.72           | 6.43            |             |
| $E_a [kJ \cdot mol^{-1}]$ | 208.6           | 139.3           | 105.0           |             |
| $c_i$                     | 46.9%           | 24.9%           | 28.2%           |             |
| $T_p$                     | 320.10 - 366.20 | 257.07 - 312.92 | 292.18 - 374.53 |             |
|                           | Free-order      |                 |                 | fit % *     |
|                           | Cellulose       | Hemicellulose   | Lignin          | 2.9% ± 0.6% |
| $\log_{10} (A [s^{-1}])$  | 15.61           | 12.55           | 18.09           |             |
| $E_a [kJ \cdot mol^{-1}]$ | 211.0           | 156.2           | 222.6           |             |
| $c_i$                     | 45.6%           | 19.3%           | 35.0%           |             |
| $n_i$                     | 1.00            | 1.62            | 7.73            |             |
| $T_p$                     | 321.48 - 366.20 | 251.49 - 301.84 | 278.20 - 316.21 |             |

\*: Confidence interval of 95%.

Table S8: Results of the model fitting for WS-P, averaged from all 5 heating rates, obtained by simultaneous fitting to all thermograms.

|                           | First-order     |                 |                 | fit % *     |
|---------------------------|-----------------|-----------------|-----------------|-------------|
|                           | Cellulose       | Hemicellulose   | Lignin          | 6.2% ± 5.9% |
| $\log_{10} (A [s^{-1}])$  | 14.24           | 9.58            | 1.45            |             |
| $E_a [kJ \cdot mol^{-1}]$ | 185.17          | 125.47          | 54.38           |             |
| $c_i$                     | 47.2%           | 24.7%           | 28.1%           |             |
| $T_p$                     | 289.29 - 354.49 | 245.83 - 331.31 | 301.97 – 500**  |             |
|                           | $n_{Lig}=3$     |                 |                 | fit % *     |
|                           | Cellulose       | Hemicellulose   | Lignin          | 5.8% ± 6.5% |
| $\log_{10} (A [s^{-1}])$  | 14.49           | 8.96            | 7.20            |             |
| $E_a [kJ \cdot mol^{-1}]$ | 188.21          | 119.76          | 119.94          |             |
| $c_i$                     | 44.3%           | 31.4%           | 24.4%           |             |
| $T_p$                     | 292.12 - 355.50 | 247.22 - 336.68 | 327.13 - 433.88 |             |
|                           | Free-order      |                 |                 | fit % *     |
|                           | Cellulose       | Hemicellulose   | Lignin          | 5.3% ± 5.6% |
| $\log_{10} (A [s^{-1}])$  | 14.74           | 10.87           | 10.71           |             |
| $E_a [kJ \cdot mol^{-1}]$ | 190.61          | 138.84          | 160.53          |             |
| $c_i$                     | 42.5%           | 32.5%           | 25.0%           |             |
| $n_i$                     | 1.00            | 1.74            | 4.93            |             |
| $T_p$                     | 290.70 - 354.03 | 248.64 - 325.22 | 331.34 - 409.95 |             |

\*: Confidence interval of 95%.

\*\*: Peak of curve outside of the temperature interval considered for this work.

Table S9: Results of the model fitting for WS-H, obtained by simultaneous fitting to all thermograms.

|                           | First-order     |                 |                 | fit % *     |
|---------------------------|-----------------|-----------------|-----------------|-------------|
|                           | Cellulose       | Hemicellulose   | Lignin          | 9.6% ± 8.9% |
| $\log_{10} (A [s^{-1}])$  | 14.78           | 11.68           | 2.79            |             |
| $E_a [kJ \cdot mol^{-1}]$ | 191.6           | 147.3           | 69.7            |             |
| $c_i$                     | 43.2%           | 32.1%           | 24.6%           |             |
| $T_p$                     | 292.12 - 355.66 | 251.48 - 325.06 | 314.49 – 500 ** |             |
|                           | $n_{Lig}=3$     |                 |                 | fit % *     |
|                           | Cellulose       | Hemicellulose   | Lignin          | 8.8% ± 9.3% |
| $\log_{10} (A [s^{-1}])$  | 15.20           | 11.72           | 7.96            |             |
| $E_a [kJ \cdot mol^{-1}]$ | 195.9           | 147.6           | 126.0           |             |
| $c_i$                     | 41.7%           | 31.7%           | 26.7%           |             |
| $T_p$                     | 292.12 - 354.17 | 251.48 - 324.10 | 315.87 - 415.28 |             |
|                           | Free-order      |                 |                 | fit % *     |
|                           | Cellulose       | Hemicellulose   | Lignin          | 8.1% ± 9.5% |
| $\log_{10} (A [s^{-1}])$  | 15.71           | 14.14           | 13.26           |             |
| $E_a [kJ \cdot mol^{-1}]$ | 201.36          | 172.50          | 185.86          |             |
| $c_i$                     | 39.0%           | 31.5%           | 29.5%           |             |
| $n_i$                     | 1.00            | 1.48            | 5.68            |             |
| $T_p$                     | 292.12 - 352.68 | 254.28 - 316.63 | 320.06 - 388.24 |             |

\*: Confidence interval of 95%.

\*\*: Peak of curve outside of the temperature interval considered for this work.

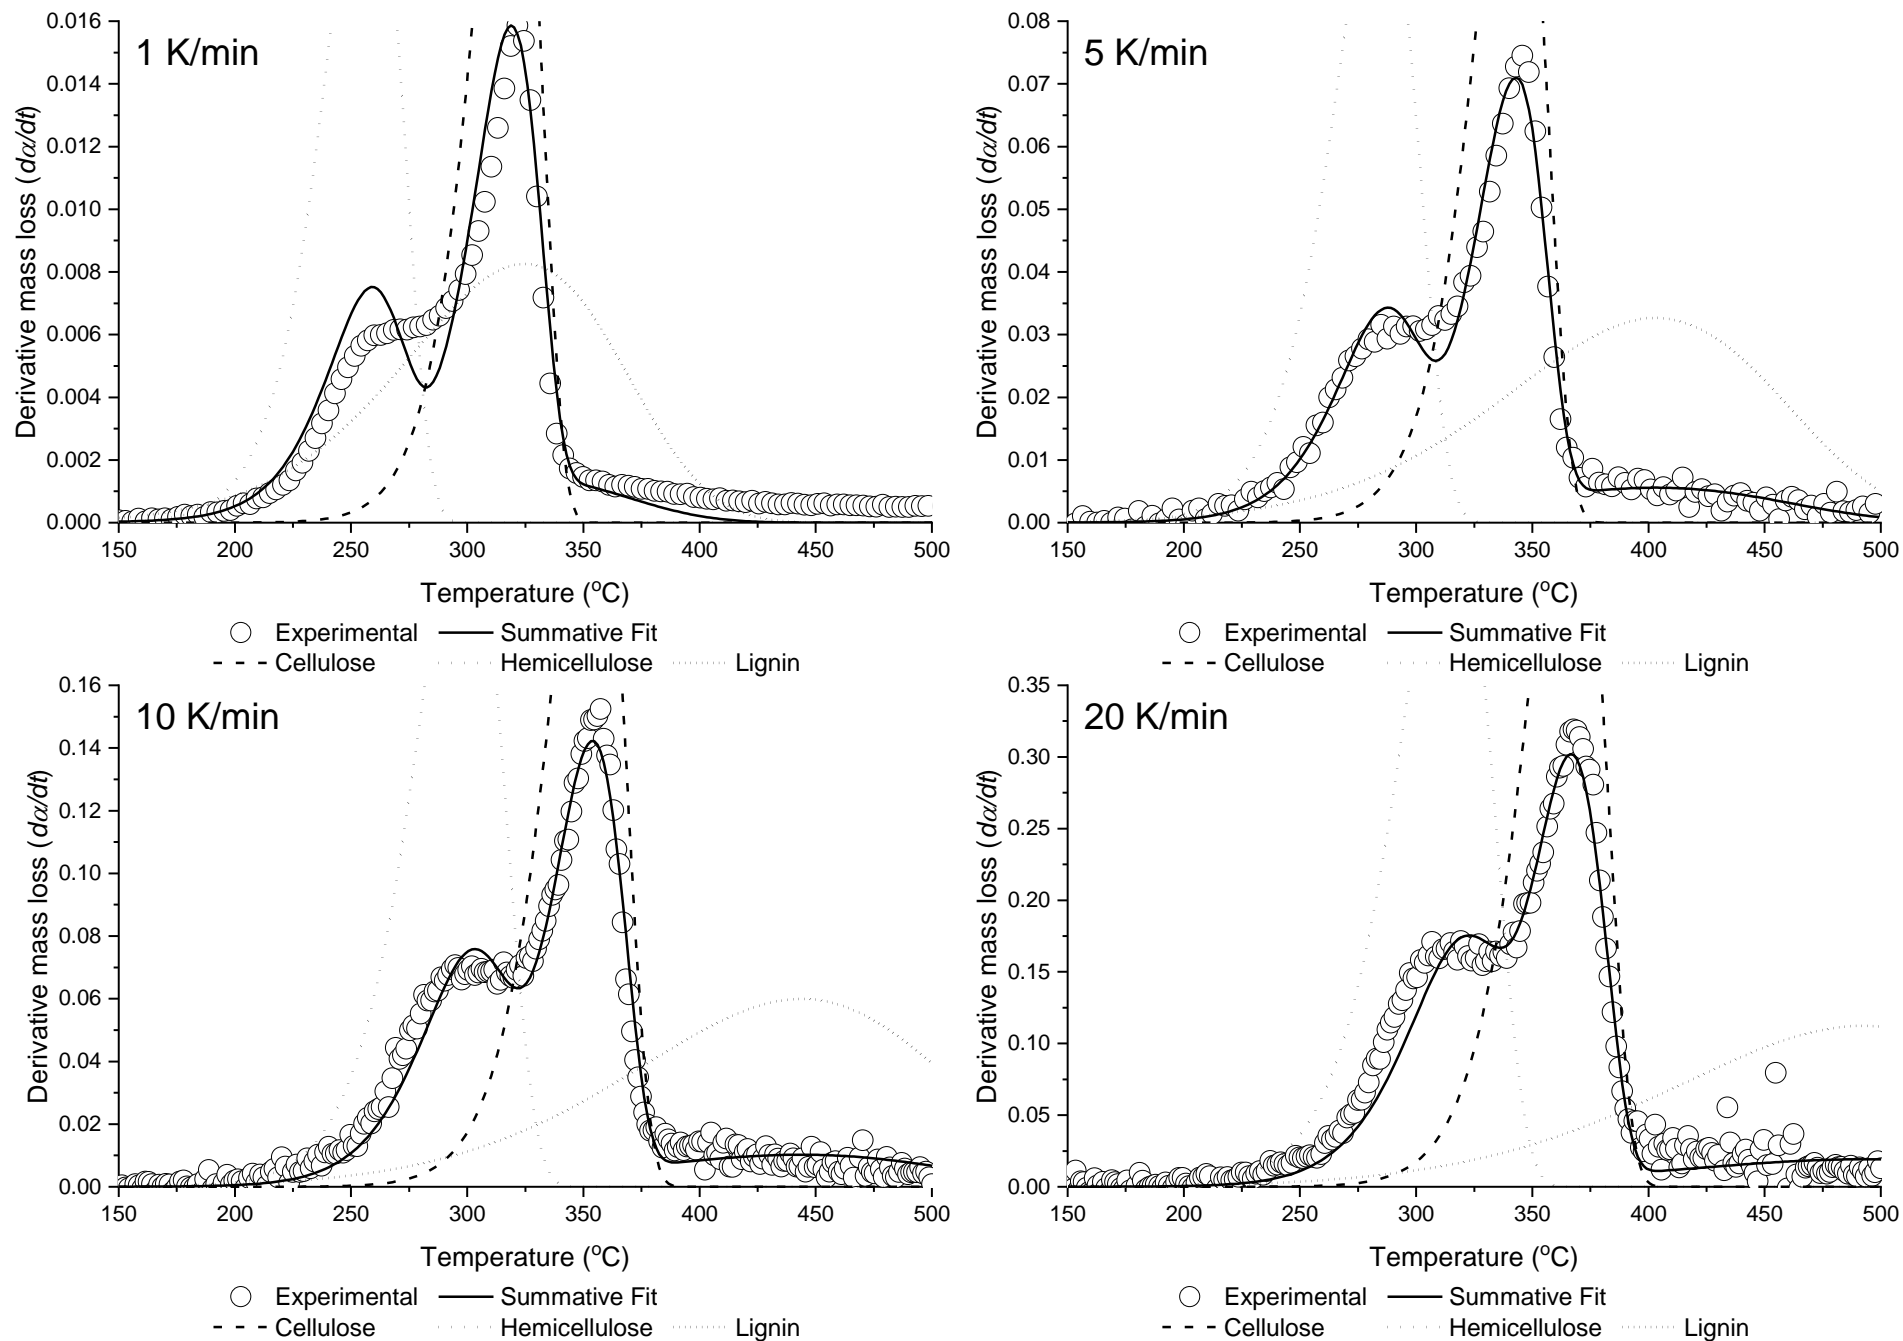

Figure S5: Model-fitting graphs for Beech, model first-order.

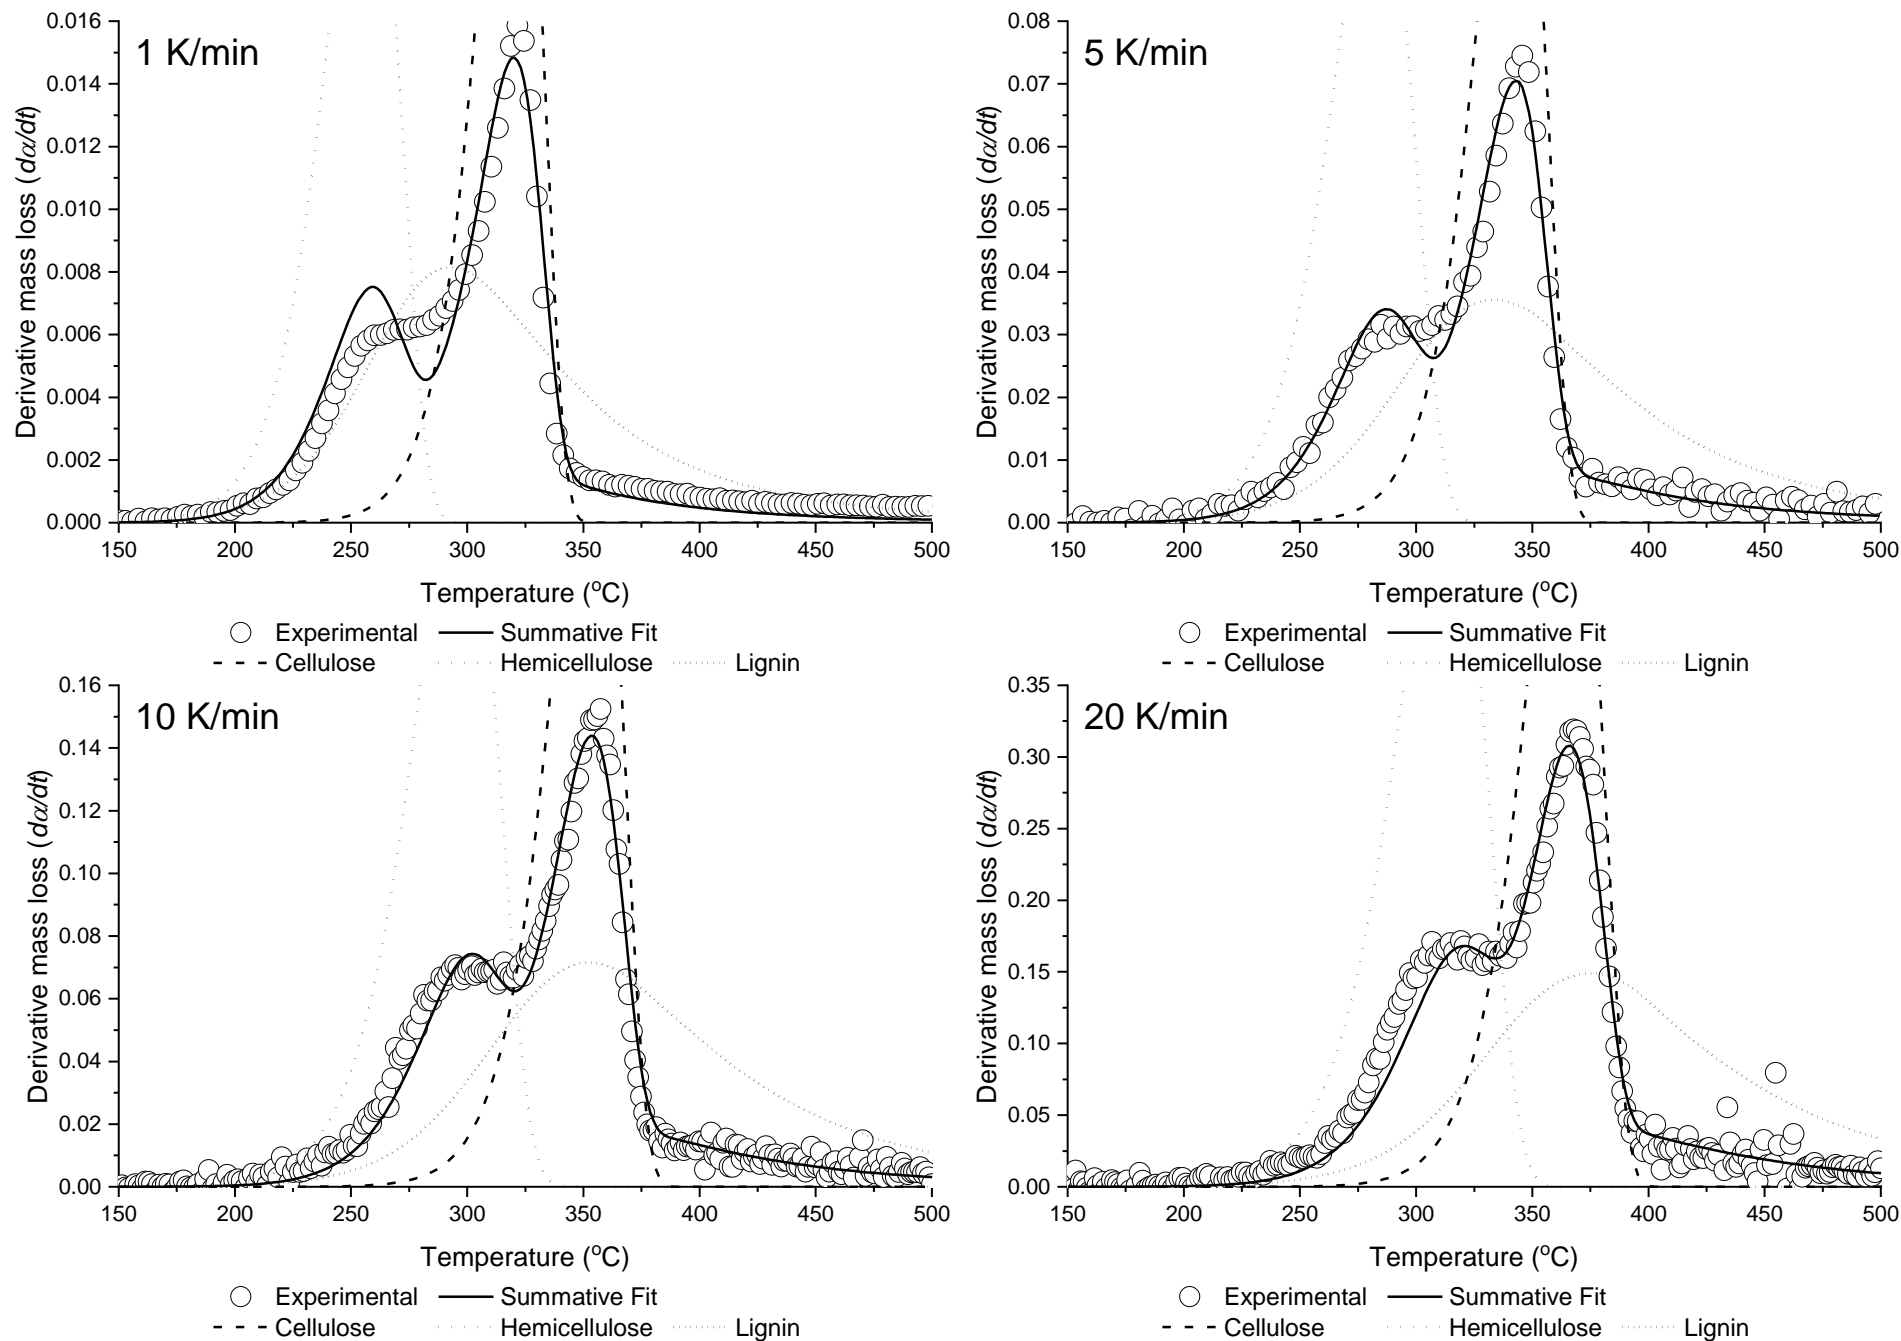

Figure S6: Model-fitting graphs for Beech, model third order to lignin.

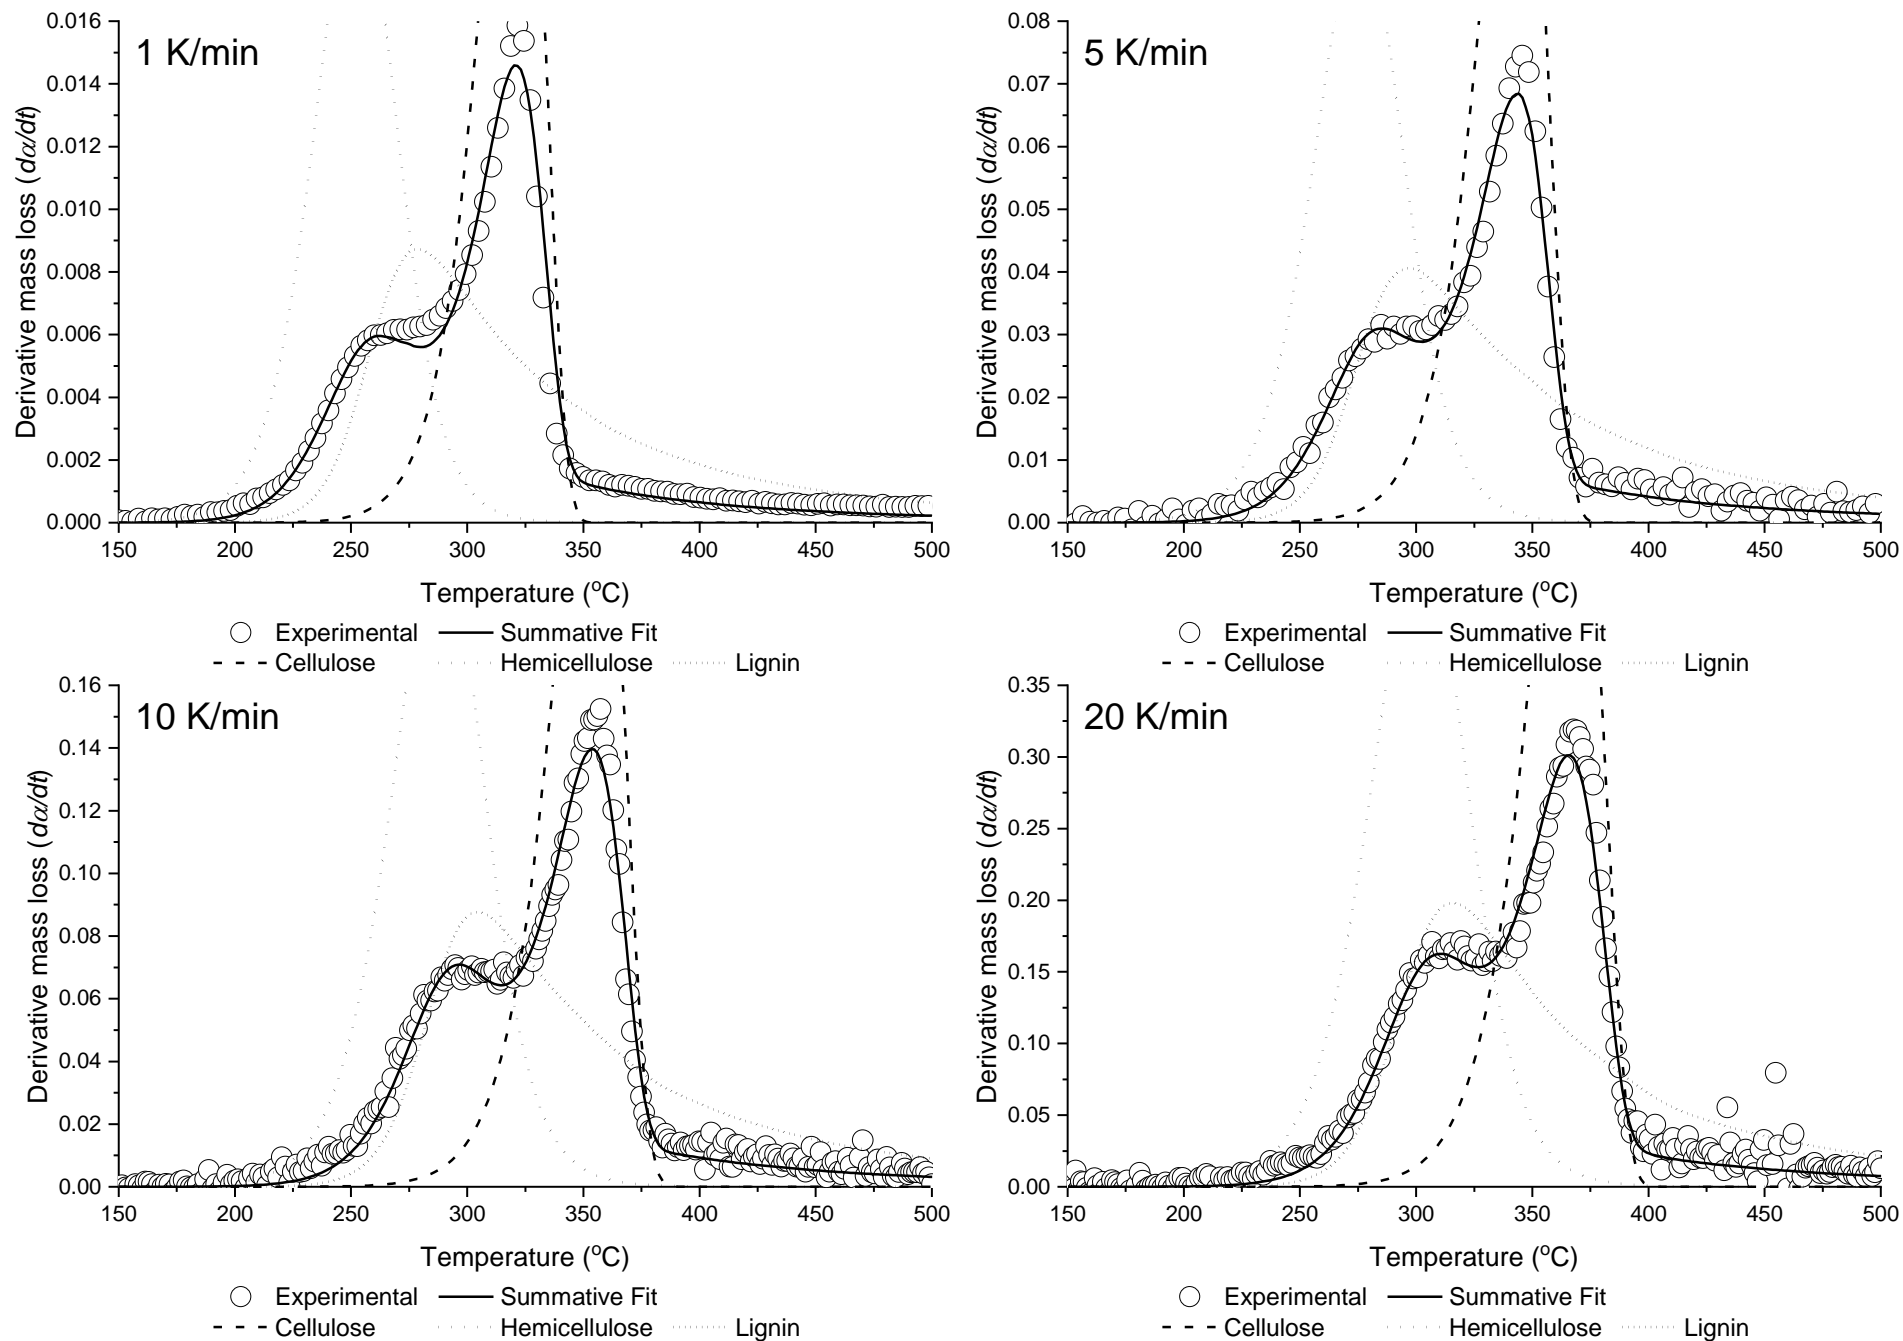

Figure S7: Model-fitting graphs for Beech, model free-order.

Kinetic parameter determination for wheat straw pyrolysis – Supplementary Information

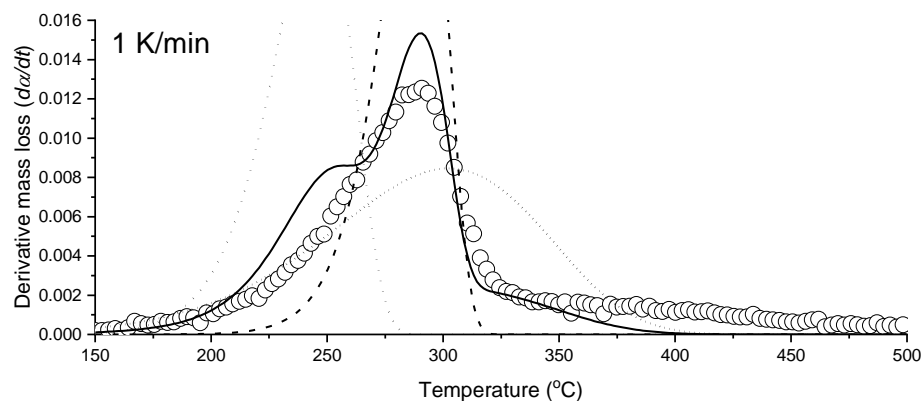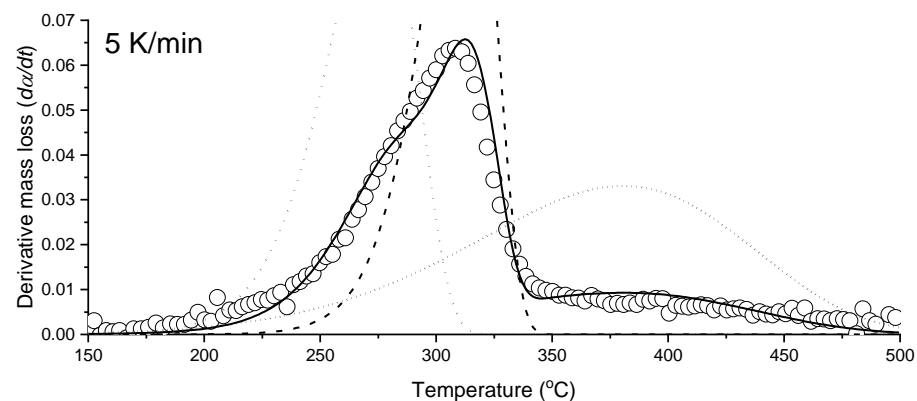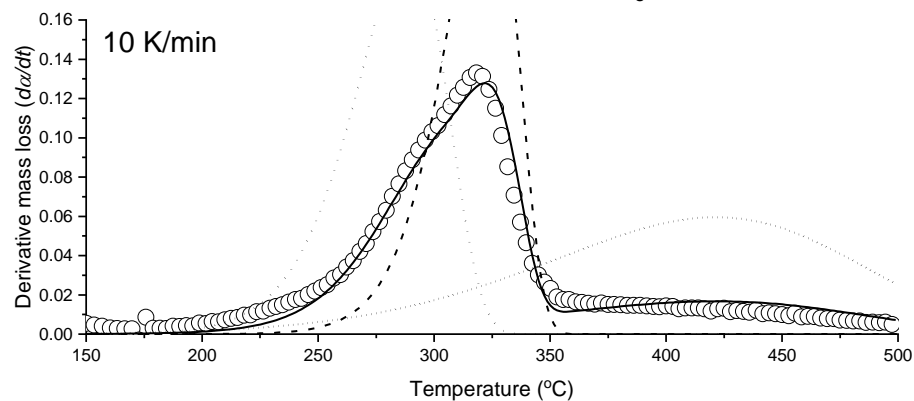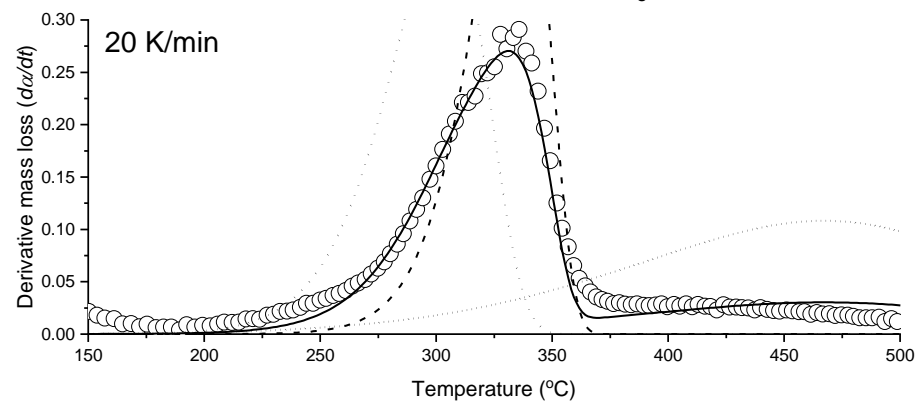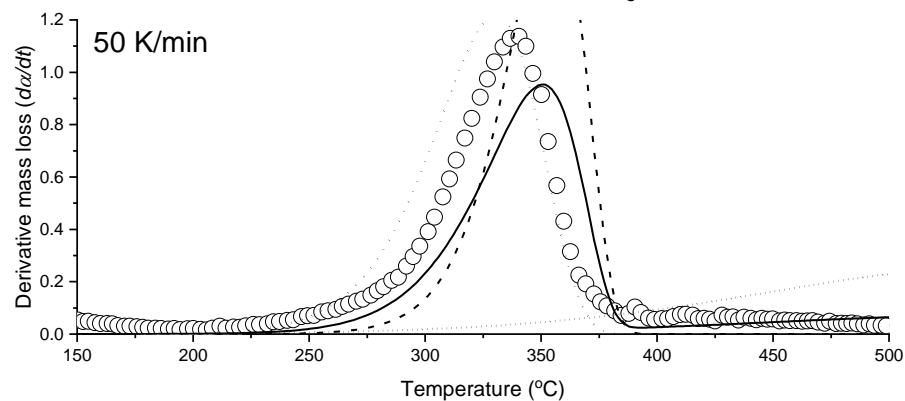

Figure S8: Model-fitting graphs for Wheat straw powder (WS-P), model first-order.

Kinetic parameter determination for wheat straw pyrolysis – Supplementary Information

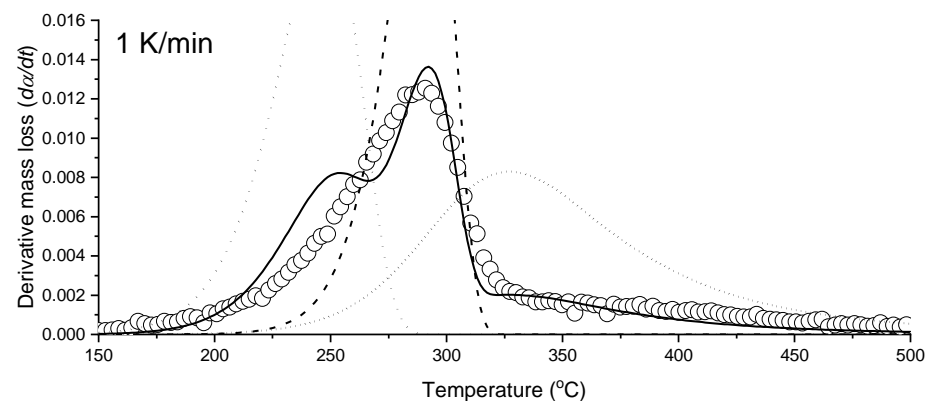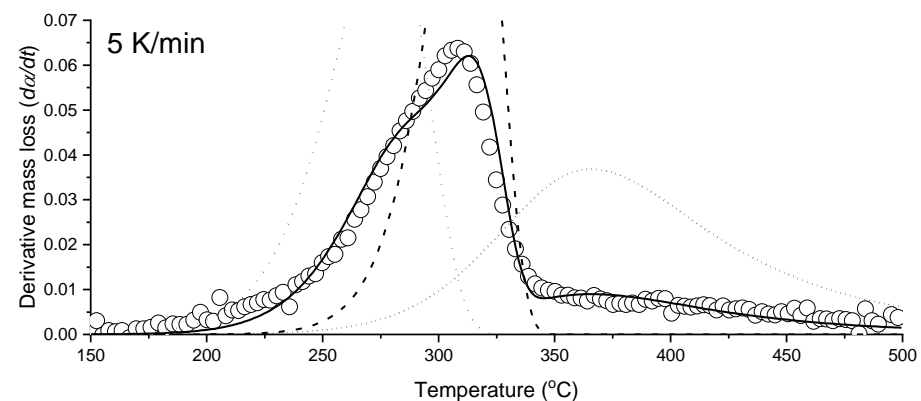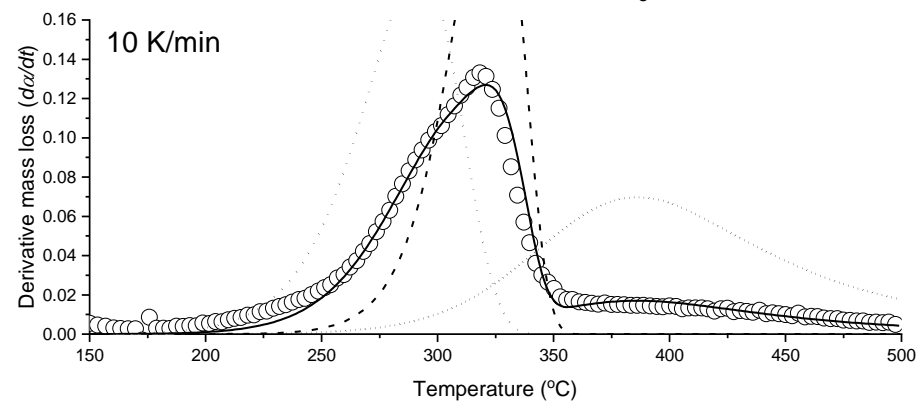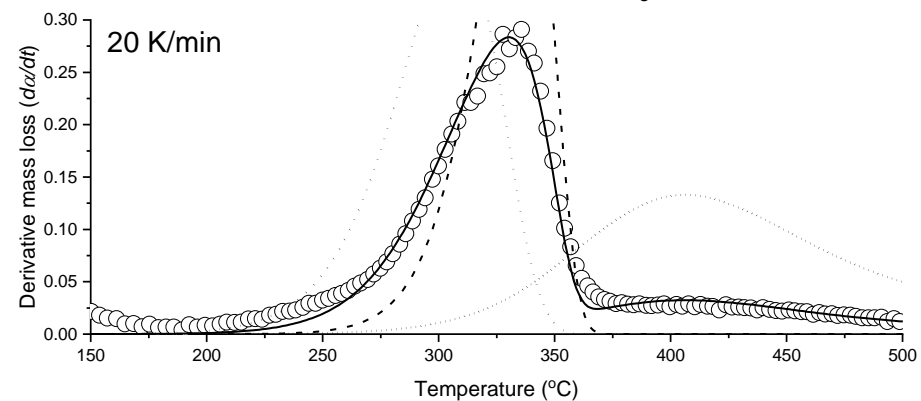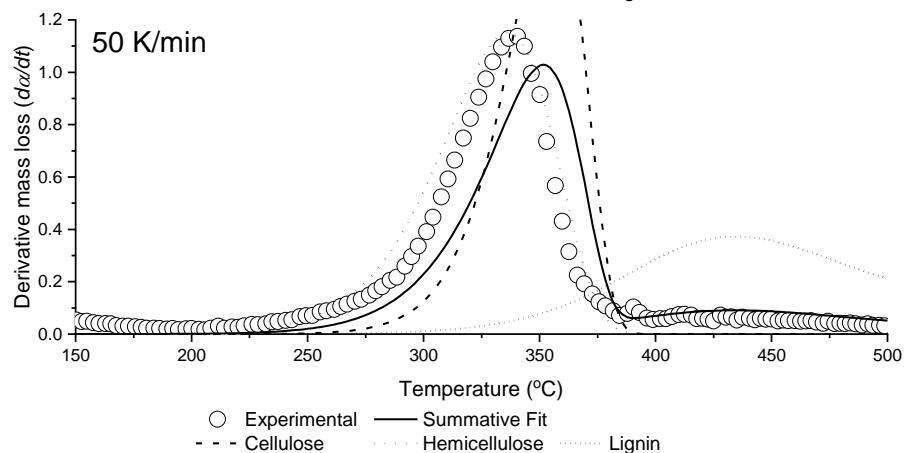

Figure S9: Model-fitting graphs for Wheat straw powder (WS-P), model third-order to lignin.



Kinetic parameter determination for wheat straw pyrolysis – Supplementary Information

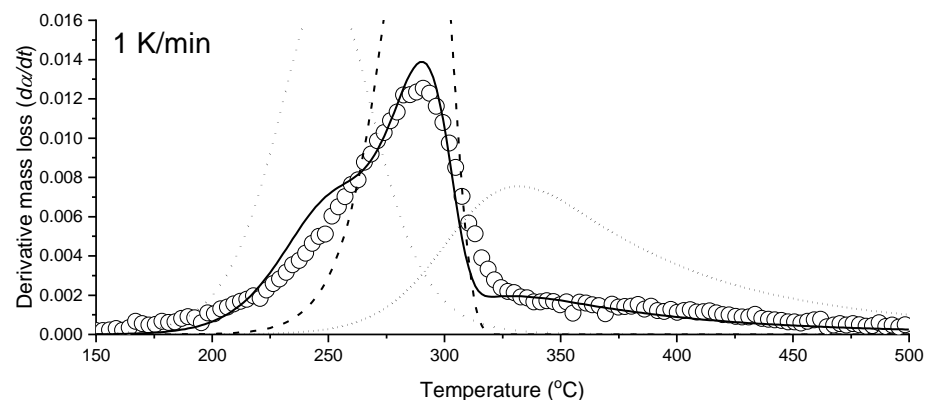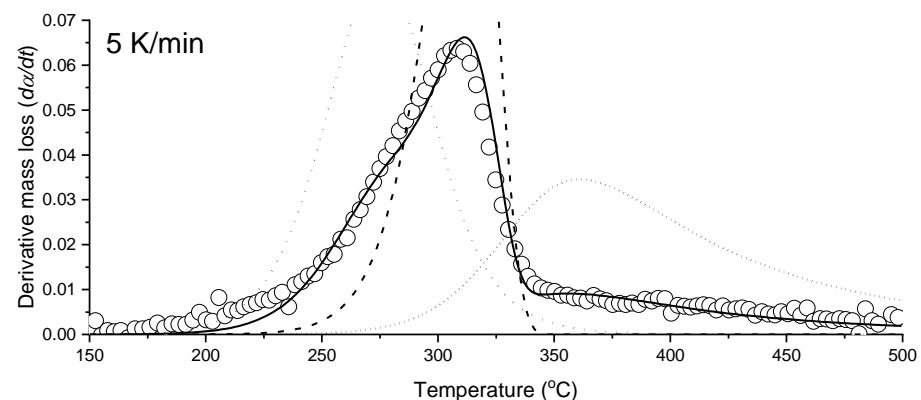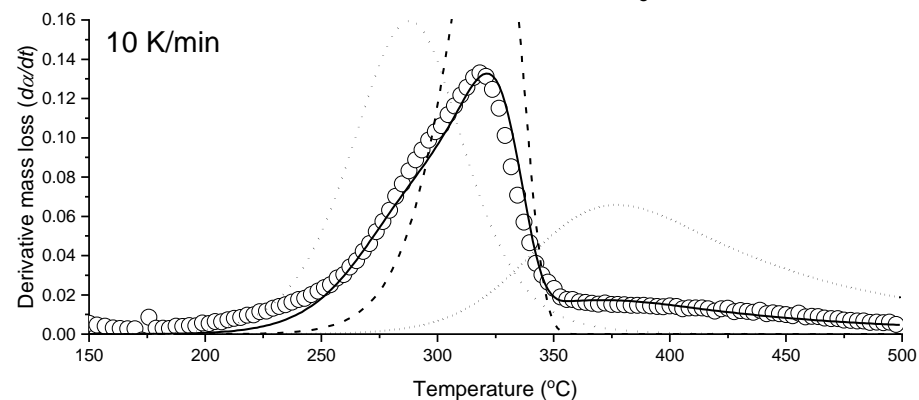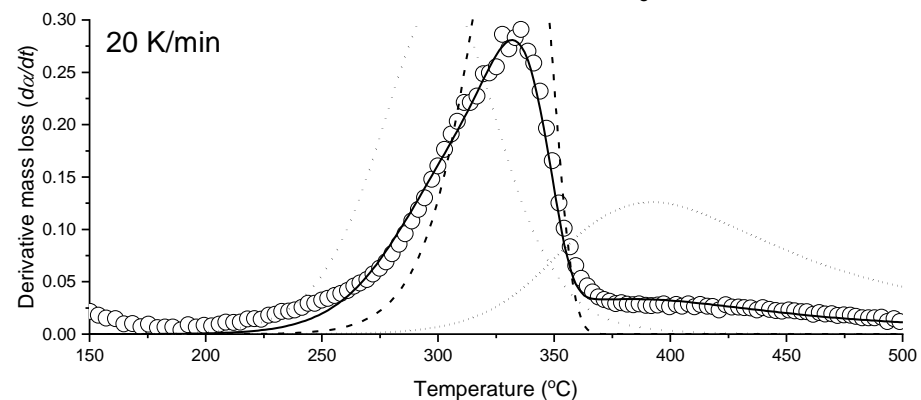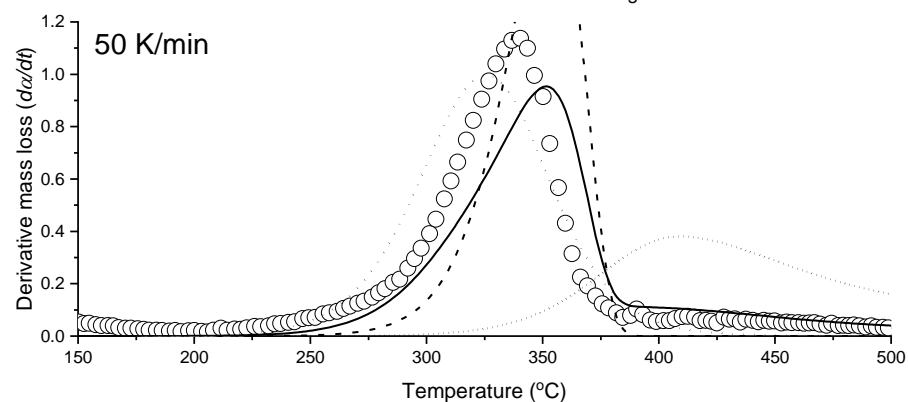

Figure S10: Model-fitting graphs for Wheat straw powder (WS-P), model free-order.

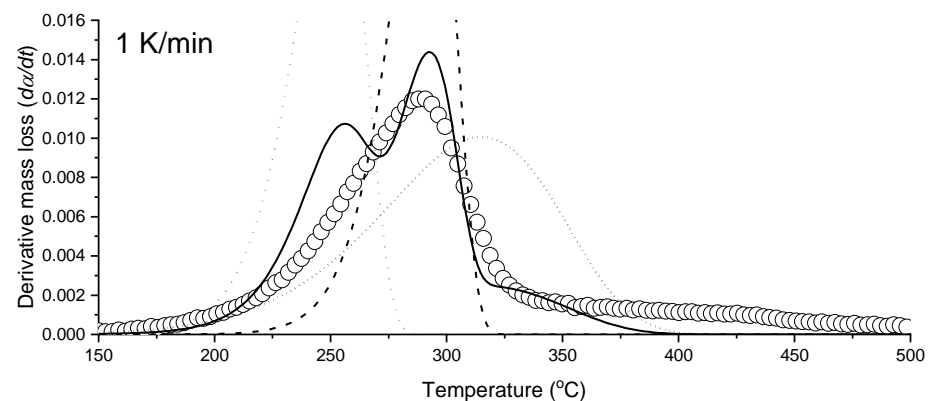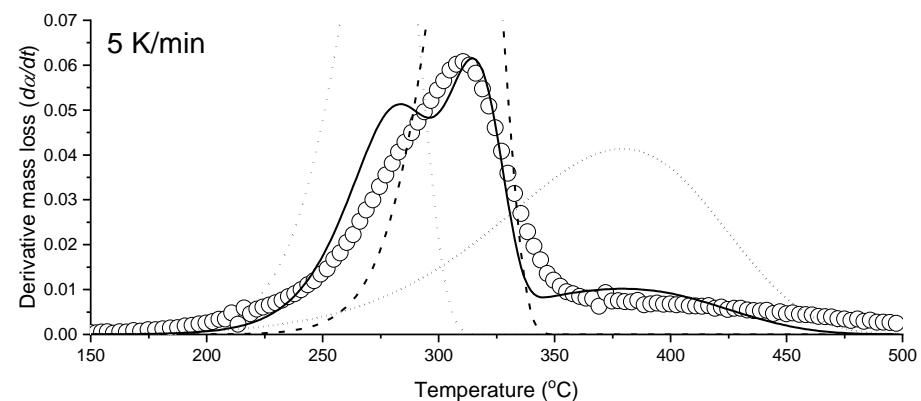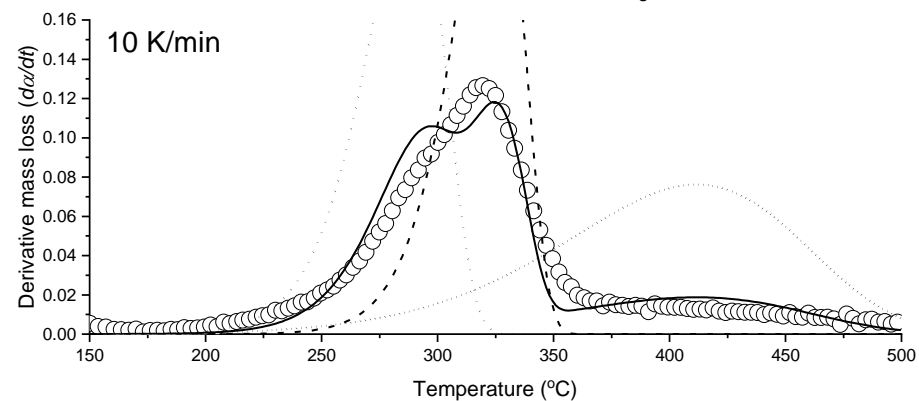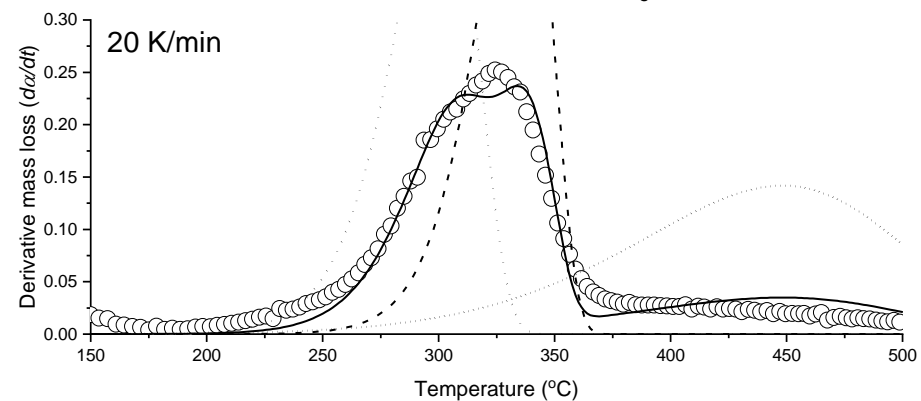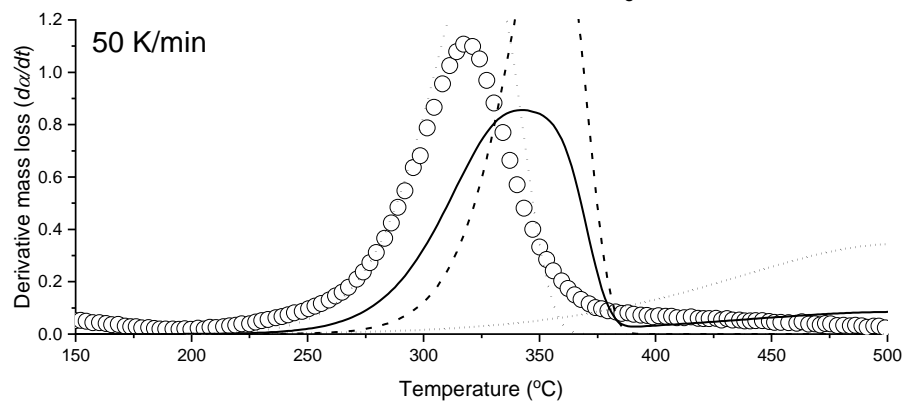

Figure S11: Model-fitting graphs for Wheat straw hull (WS-W), model first-order.

Kinetic parameter determination for wheat straw pyrolysis – Supplementary Information

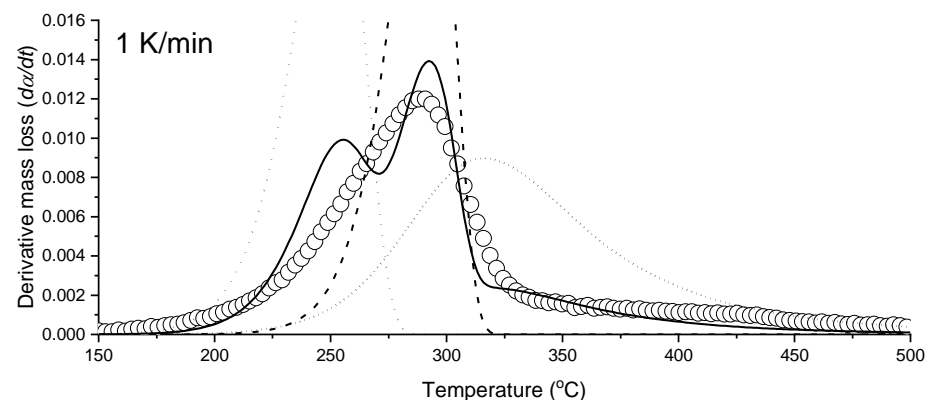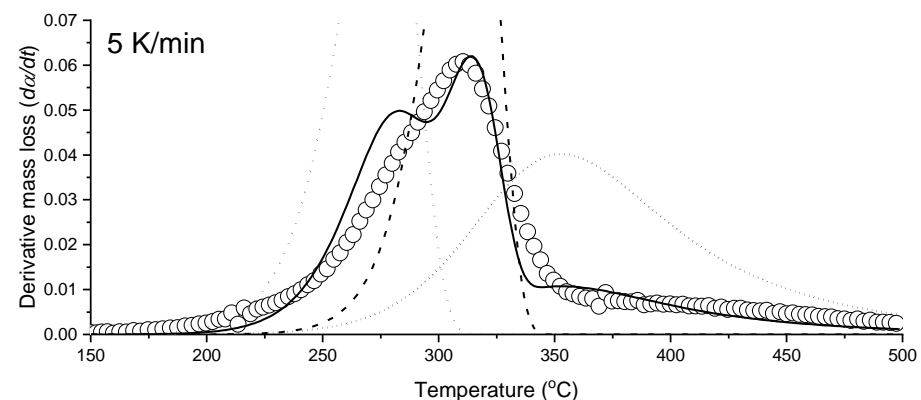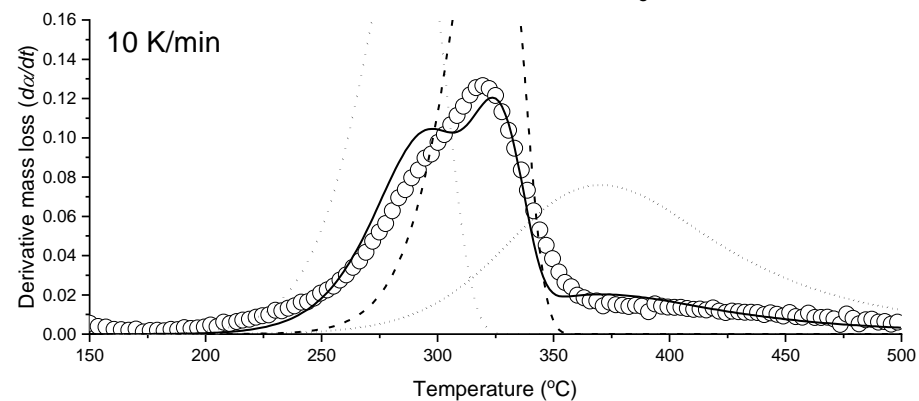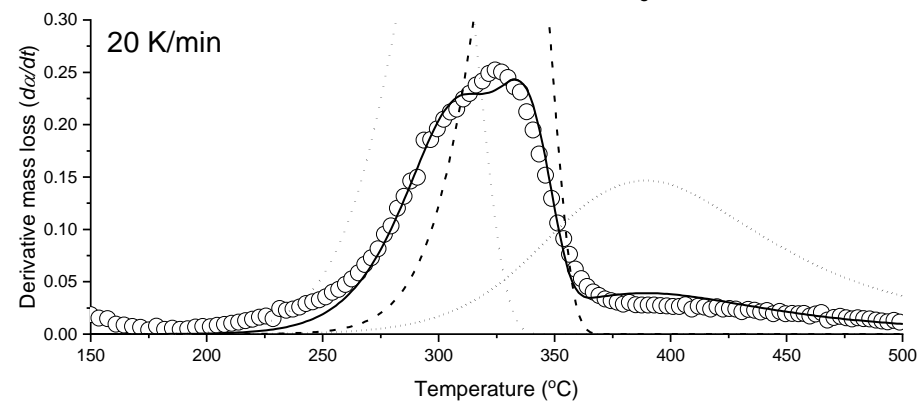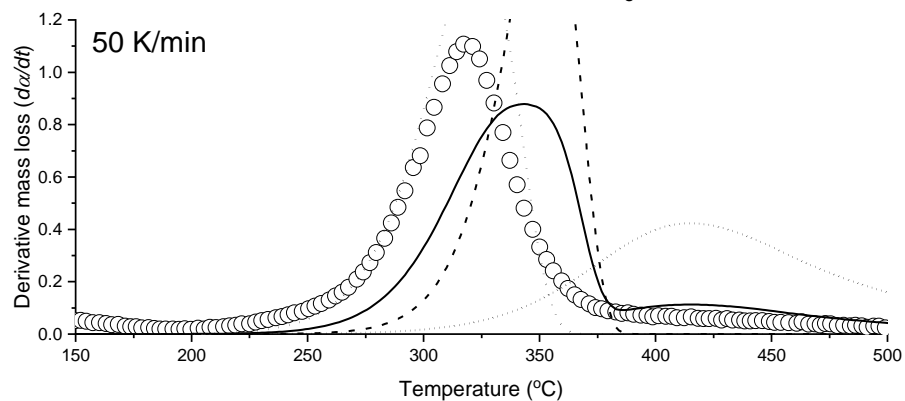

Figure S12: Model-fitting graphs for Wheat straw hull (WS-W), model third-order to lignin.

Kinetic parameter determination for wheat straw pyrolysis – Supplementary Information

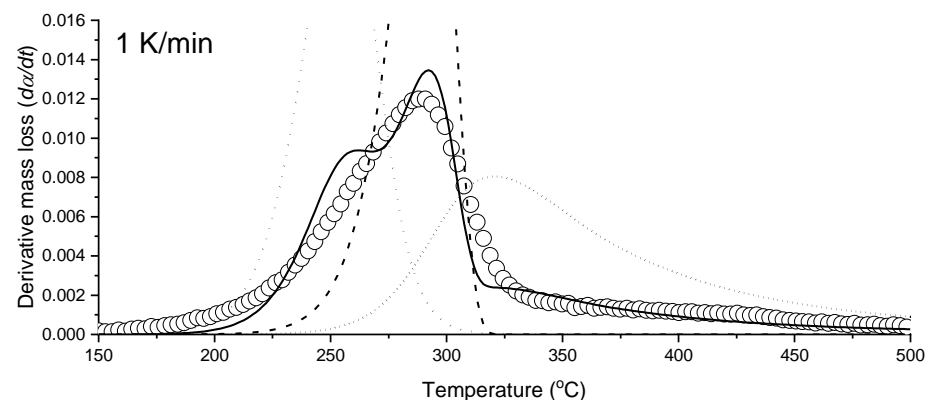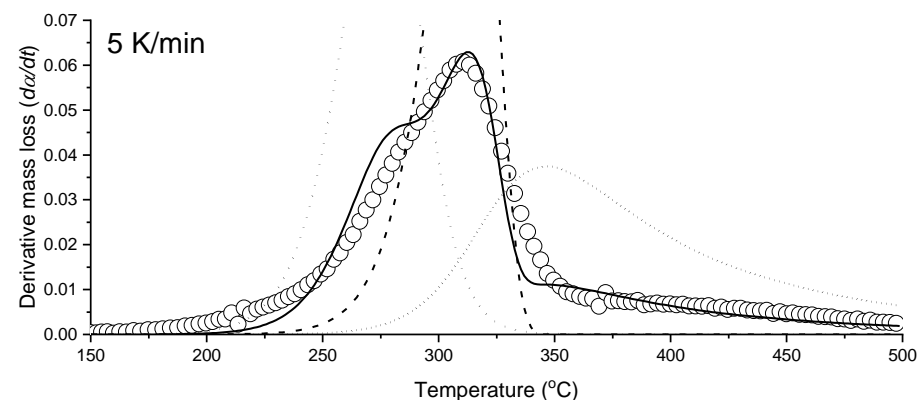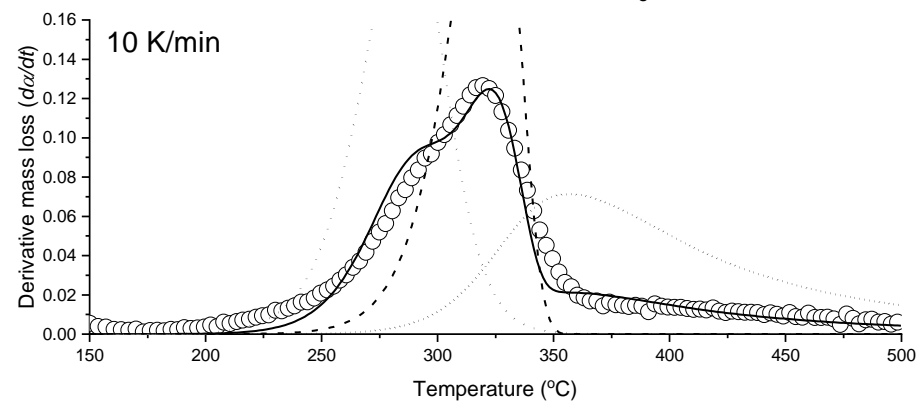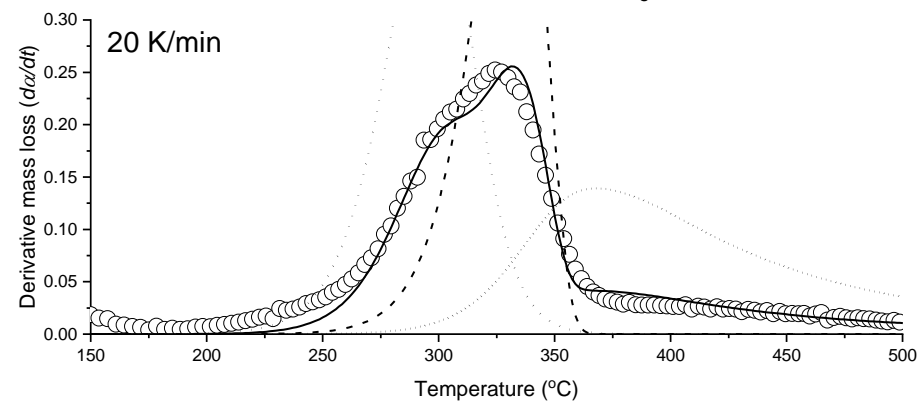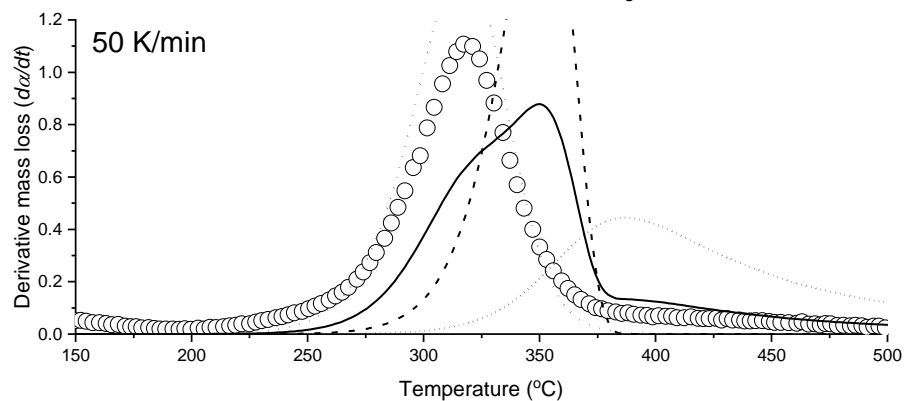

Figure S13: Model-fitting graphs for Wheat straw hull (WS-W), model free-order.

## Isoconversional Methods

### Numerical values

Table S10: Kinetic parameters obtained for Beech using the isoconversional methods.

| $\alpha$    | KAS                  |                          | FWO                 |                          | Friedman             |                          |
|-------------|----------------------|--------------------------|---------------------|--------------------------|----------------------|--------------------------|
|             | $E_a$ (kJ/mol)       | $\log_{10} (A [s^{-1}])$ | $E_a$ (kJ/mol)      | $\log_{10} (A [s^{-1}])$ | $E_a$ (kJ/mol)       | $\log_{10} (A [s^{-1}])$ |
| <b>0.05</b> | 164.21 $\pm$ 6.71    | 12.68 $\pm$ 0.50         | 164.44 $\pm$ 6.31   | 10.41 $\pm$ 5.29         | 162.65 $\pm$ 3.56    | 12.42 $\pm$ 1.41         |
| <b>0.10</b> | 164.91 $\pm$ 4.50    | 12.61 $\pm$ 0.41         | 165.33 $\pm$ 4.21   | 10.35 $\pm$ 5.04         | 169.75 $\pm$ 3.38    | 12.95 $\pm$ 1.41         |
| <b>0.15</b> | 170.44 $\pm$ 5.65    | 13.05 $\pm$ 0.80         | 170.73 $\pm$ 5.32   | 10.78 $\pm$ 4.85         | 179.13 $\pm$ 5.41    | 13.67 $\pm$ 1.20         |
| <b>0.20</b> | 177.45 $\pm$ 3.64    | 13.61 $\pm$ 0.55         | 177.53 $\pm$ 3.40   | 11.31 $\pm$ 4.71         | 188.90 $\pm$ 1.56    | 14.38 $\pm$ 1.54         |
| <b>0.25</b> | 177.52 $\pm$ 5.11    | 13.47 $\pm$ 0.94         | 177.72 $\pm$ 4.79   | 11.19 $\pm$ 4.62         | 190.76 $\pm$ 5.54    | 14.34 $\pm$ 1.15         |
| <b>0.30</b> | 187.77 $\pm$ 8.19    | 14.28 $\pm$ 1.51         | 187.60 $\pm$ 7.73   | 11.97 $\pm$ 4.46         | 197.45 $\pm$ 6.64    | 14.74 $\pm$ 1.02         |
| <b>0.35</b> | 193.60 $\pm$ 6.30    | 14.67 $\pm$ 1.30         | 193.25 $\pm$ 5.93   | 12.33 $\pm$ 4.44         | 199.26 $\pm$ 4.42    | 14.72 $\pm$ 1.20         |
| <b>0.40</b> | 196.12 $\pm$ 3.23    | 14.74 $\pm$ 0.80         | 195.76 $\pm$ 3.00   | 12.41 $\pm$ 4.35         | 199.80 $\pm$ 2.53    | 14.62 $\pm$ 1.33         |
| <b>0.45</b> | 196.71 $\pm$ 3.54    | 14.66 $\pm$ 0.94         | 196.43 $\pm$ 3.30   | 12.33 $\pm$ 4.30         | 200.80 $\pm$ 2.37    | 14.62 $\pm$ 1.31         |
| <b>0.50</b> | 201.05 $\pm$ 3.93    | 14.94 $\pm$ 1.08         | 200.64 $\pm$ 3.70   | 12.60 $\pm$ 4.25         | 200.56 $\pm$ 0.81    | 14.55 $\pm$ 1.41         |
| <b>0.55</b> | 202.88 $\pm$ 1.61    | 15.03 $\pm$ 0.55         | 202.45 $\pm$ 1.48   | 12.69 $\pm$ 3.99         | 201.08 $\pm$ 1.03    | 14.58 $\pm$ 1.34         |
| <b>0.60</b> | 199.93 $\pm$ 4.02    | 14.70 $\pm$ 1.21         | 199.72 $\pm$ 3.75   | 12.38 $\pm$ 4.14         | 198.90 $\pm$ 4.25    | 14.38 $\pm$ 1.02         |
| <b>0.65</b> | 202.65 $\pm$ 4.59    | 14.90 $\pm$ 1.37         | 202.35 $\pm$ 4.36   | 12.58 $\pm$ 4.09         | 200.60 $\pm$ 6.70    | 14.53 $\pm$ 0.76         |
| <b>0.70</b> | 201.77 $\pm$ 3.63    | 14.78 $\pm$ 1.25         | 201.57 $\pm$ 3.39   | 12.46 $\pm$ 4.01         | 201.44 $\pm$ 4.93    | 14.56 $\pm$ 0.84         |
| <b>0.75</b> | 198.78 $\pm$ 5.00    | 14.49 $\pm$ 1.56         | 198.79 $\pm$ 4.71   | 12.19 $\pm$ 3.98         | 202.19 $\pm$ 6.36    | 14.56 $\pm$ 0.65         |
| <b>0.80</b> | 198.05 $\pm$ 4.67    | 14.39 $\pm$ 1.57         | 198.16 $\pm$ 4.38   | 12.09 $\pm$ 3.91         | 210.60 $\pm$ 6.68    | 15.14 $\pm$ 0.53         |
| <b>0.85</b> | 212.14 $\pm$ 5.77    | 15.51 $\pm$ 1.82         | 211.63 $\pm$ 5.43   | 13.16 $\pm$ 3.84         | 275.01 $\pm$ 6.18    | 20.15 $\pm$ 0.45         |
| <b>0.90</b> | 354.51 $\pm$ 23.26   | 26.72 $\pm$ 3.89         | 347.28 $\pm$ 22.06  | 23.97 $\pm$ 2.98         | 443.27 $\pm$ 11.50   | 32.66 $\pm$ 0.14         |
| <b>0.95</b> | 1006.56 $\pm$ 234.32 | 74.53 $\pm$ 20.77        | 967.78 $\pm$ 222.73 | 70.93 $\pm$ 11.89        | 1101.33 $\pm$ 338.10 | 80.00 $\pm$ 24.94        |

Table S11: Kinetic parameters obtained for WS-P using the isoconversional methods.

| $\alpha$    | KAS                 |                          | FWO                 |                          | Friedman            |                          |
|-------------|---------------------|--------------------------|---------------------|--------------------------|---------------------|--------------------------|
|             | $E_a$ (kJ/mol)      | $\log_{10} (A [s^{-1}])$ | $E_a$ (kJ/mol)      | $\log_{10} (A [s^{-1}])$ | $E_a$ (kJ/mol)      | $\log_{10} (A [s^{-1}])$ |
| <b>0.05</b> | 222.51 $\pm$ 16.03  | 19.67 $\pm$ 1.87         | 241.08 $\pm$ 21.28  | 19.43 $\pm$ 4.18         | 195.54 $\pm$ 10.33  | 16.38 $\pm$ 0.70         |
| <b>0.10</b> | 186.63 $\pm$ 8.20   | 15.31 $\pm$ 1.05         | 193.57 $\pm$ 7.56   | 13.73 $\pm$ 4.94         | 168.14 $\pm$ 8.85   | 13.10 $\pm$ 0.87         |
| <b>0.15</b> | 176.54 $\pm$ 8.19   | 14.04 $\pm$ 1.21         | 185.59 $\pm$ 8.52   | 12.65 $\pm$ 4.72         | 170.23 $\pm$ 9.32   | 13.13 $\pm$ 0.82         |
| <b>0.20</b> | 182.34 $\pm$ 7.72   | 14.44 $\pm$ 1.27         | 190.19 $\pm$ 7.60   | 12.92 $\pm$ 4.64         | 181.17 $\pm$ 7.93   | 14.05 $\pm$ 0.94         |
| <b>0.25</b> | 181.98 $\pm$ 8.18   | 14.30 $\pm$ 1.44         | 190.24 $\pm$ 7.96   | 12.81 $\pm$ 4.52         | 186.86 $\pm$ 6.66   | 14.49 $\pm$ 1.04         |
| <b>0.30</b> | 184.47 $\pm$ 7.04   | 14.44 $\pm$ 1.35         | 193.45 $\pm$ 8.08   | 13.01 $\pm$ 4.43         | 192.84 $\pm$ 4.40   | 14.95 $\pm$ 1.22         |
| <b>0.35</b> | 193.29 $\pm$ 8.86   | 15.20 $\pm$ 1.70         | 201.51 $\pm$ 8.40   | 13.68 $\pm$ 4.34         | 200.59 $\pm$ 4.98   | 15.58 $\pm$ 1.14         |
| <b>0.40</b> | 197.54 $\pm$ 6.76   | 15.51 $\pm$ 1.45         | 210.33 $\pm$ 11.40  | 14.43 $\pm$ 4.12         | 209.08 $\pm$ 3.28   | 16.27 $\pm$ 1.26         |
| <b>0.45</b> | 205.68 $\pm$ 6.87   | 16.19 $\pm$ 1.54         | 216.54 $\pm$ 9.99   | 14.91 $\pm$ 4.14         | 216.00 $\pm$ 3.75   | 16.81 $\pm$ 1.18         |
| <b>0.50</b> | 200.96 $\pm$ 7.03   | 15.67 $\pm$ 1.62         | 217.55 $\pm$ 15.07  | 14.93 $\pm$ 3.79         | 219.58 $\pm$ 5.02   | 17.06 $\pm$ 1.03         |
| <b>0.55</b> | 201.21 $\pm$ 5.78   | 15.63 $\pm$ 1.48         | 220.11 $\pm$ 17.34  | 15.10 $\pm$ 3.58         | 224.17 $\pm$ 6.82   | 17.40 $\pm$ 0.83         |
| <b>0.60</b> | 210.75 $\pm$ 8.13   | 16.44 $\pm$ 1.89         | 225.84 $\pm$ 14.01  | 15.55 $\pm$ 3.75         | 233.26 $\pm$ 5.10   | 18.12 $\pm$ 0.93         |
| <b>0.65</b> | 218.34 $\pm$ 5.78   | 17.06 $\pm$ 1.59         | 234.34 $\pm$ 14.65  | 16.24 $\pm$ 3.66         | 246.28 $\pm$ 2.83   | 19.16 $\pm$ 1.08         |
| <b>0.70</b> | 233.13 $\pm$ 6.32   | 18.28 $\pm$ 1.73         | 251.05 $\pm$ 17.10  | 17.64 $\pm$ 3.45         | 276.96 $\pm$ 4.28   | 21.65 $\pm$ 0.88         |
| <b>0.75</b> | 244.29 $\pm$ 4.69   | 19.14 $\pm$ 1.52         | 266.04 $\pm$ 21.47  | 18.84 $\pm$ 3.11         | 308.74 $\pm$ 17.27  | 24.12 $\pm$ 0.31         |
| <b>0.80</b> | 293.39 $\pm$ 13.69  | 23.15 $\pm$ 2.81         | 323.86 $\pm$ 34.95  | 23.66 $\pm$ 2.08         | 410.51 $\pm$ 47.73  | 32.25 $\pm$ 2.97         |
| <b>0.85</b> | 399.75 $\pm$ 151.71 | 31.30 $\pm$ 15.28        | 389.93 $\pm$ 144.20 | 28.41 $\pm$ 6.77         | 509.70 $\pm$ 290.93 | 39.17 $\pm$ 23.13        |
| <b>0.90</b> | 499.99 $\pm$ 334.65 | 37.73 $\pm$ 29.53        | 485.73 $\pm$ 318.10 | 34.70 $\pm$ 20.34        | 495.08 $\pm$ 345.33 | 35.97 $\pm$ 26.40        |
| <b>0.95</b> | 656.71 $\pm$ 600.22 | 47.35 $\pm$ 48.14        | 635.34 $\pm$ 570.53 | 44.13 $\pm$ 38.44        | 723.02 $\pm$ 653.27 | 50.93 $\pm$ 48.05        |

Table S12: Kinetic parameters obtained for WS-H using the isoconversional methods.

| $\alpha$    | KAS            |                         | FWO            |                         | Friedman       |                         |
|-------------|----------------|-------------------------|----------------|-------------------------|----------------|-------------------------|
|             | $E_a$ (kJ/mol) | $\log_{10}(A [s^{-1}])$ | $E_a$ (kJ/mol) | $\log_{10}(A [s^{-1}])$ | $E_a$ (kJ/mol) | $\log_{10}(A [s^{-1}])$ |
| <b>0.05</b> | 219.08 ± 23.28 | 19.04 ± 2.76            | 216.27 ± 22.16 | 16.49 ± 4.11            | 191.55 ± 9.25  | 15.78 ± 0.81            |
| <b>0.10</b> | 192.54 ± 14.15 | 15.81 ± 1.86            | 191.36 ± 13.49 | 13.40 ± 4.57            | 189.51 ± 11.80 | 15.20 ± 0.57            |
| <b>0.15</b> | 198.97 ± 13.35 | 16.21 ± 1.92            | 197.65 ± 12.74 | 13.79 ± 4.46            | 205.13 ± 13.57 | 16.52 ± 0.40            |
| <b>0.20</b> | 204.35 ± 13.73 | 16.57 ± 2.09            | 202.90 ± 13.09 | 14.13 ± 4.32            | 212.06 ± 13.83 | 17.01 ± 0.37            |
| <b>0.25</b> | 204.04 ± 14.73 | 16.42 ± 2.31            | 202.71 ± 14.05 | 14.00 ± 4.16            | 215.23 ± 15.96 | 17.17 ± 0.16            |
| <b>0.30</b> | 209.52 ± 16.45 | 16.84 ± 2.60            | 208.00 ± 15.69 | 14.40 ± 3.97            | 219.03 ± 18.29 | 17.40 ± 0.07            |
| <b>0.35</b> | 215.63 ± 18.45 | 17.30 ± 2.90            | 213.89 ± 17.58 | 14.84 ± 3.77            | 221.32 ± 18.50 | 17.49 ± 0.11            |
| <b>0.40</b> | 215.69 ± 14.95 | 17.22 ± 2.55            | 214.02 ± 14.26 | 14.77 ± 3.94            | 224.49 ± 14.02 | 17.69 ± 0.28            |
| <b>0.45</b> | 226.86 ± 18.57 | 18.15 ± 3.02            | 224.72 ± 17.69 | 15.67 ± 3.65            | 235.21 ± 16.02 | 18.55 ± 0.07            |
| <b>0.50</b> | 229.45 ± 17.59 | 18.29 ± 2.97            | 227.25 ± 16.76 | 15.81 ± 3.66            | 240.52 ± 15.75 | 18.92 ± 0.06            |
| <b>0.55</b> | 225.04 ± 14.68 | 17.82 ± 2.68            | 223.11 ± 14.01 | 15.36 ± 3.79            | 238.31 ± 14.34 | 18.64 ± 0.15            |
| <b>0.60</b> | 230.22 ± 16.60 | 18.20 ± 2.95            | 228.10 ± 15.83 | 15.73 ± 3.62            | 246.08 ± 17.82 | 19.21 ± 0.20            |
| <b>0.65</b> | 244.68 ± 13.63 | 19.40 ± 2.65            | 241.92 ± 13.01 | 16.87 ± 3.75            | 269.20 ± 16.42 | 21.08 ± 0.12            |
| <b>0.70</b> | 241.81 ± 21.62 | 19.02 ± 3.60            | 239.26 ± 20.60 | 16.51 ± 3.20            | 267.03 ± 29.81 | 20.69 ± 1.34            |
| <b>0.75</b> | 262.39 ± 23.47 | 20.68 ± 3.84            | 258.92 ± 22.35 | 18.11 ± 3.04            | 300.05 ± 35.25 | 23.28 ± 1.86            |
| <b>0.80</b> | 275.57 ± 15.46 | 21.48 ± 3.02            | 271.57 ± 14.73 | 18.89 ± 3.50            | 326.19 ± 20.22 | 24.89 ± 0.65            |
| <b>0.85</b> | 363.52 ± 79.40 | 28.17 ± 9.05            | 355.49 ± 75.49 | 25.37 ± 1.11            | 375.81 ± 88.40 | 27.92 ± 6.36            |
| <b>0.90</b> | 435.08 ± 75.05 | 32.36 ± 8.43            | 424.06 ± 71.36 | 31.76 ± 0.54            | 455.00 ± 76.93 | 32.61 ± 5.26            |
| <b>0.95</b> | 600.73 ± 67.29 | 42.79 ± 7.58            | 582.18 ± 63.98 | 41.97 ± 0.22            | 605.02 ± 58.80 | 41.80 ± 3.87            |

## Arrhenius Plots

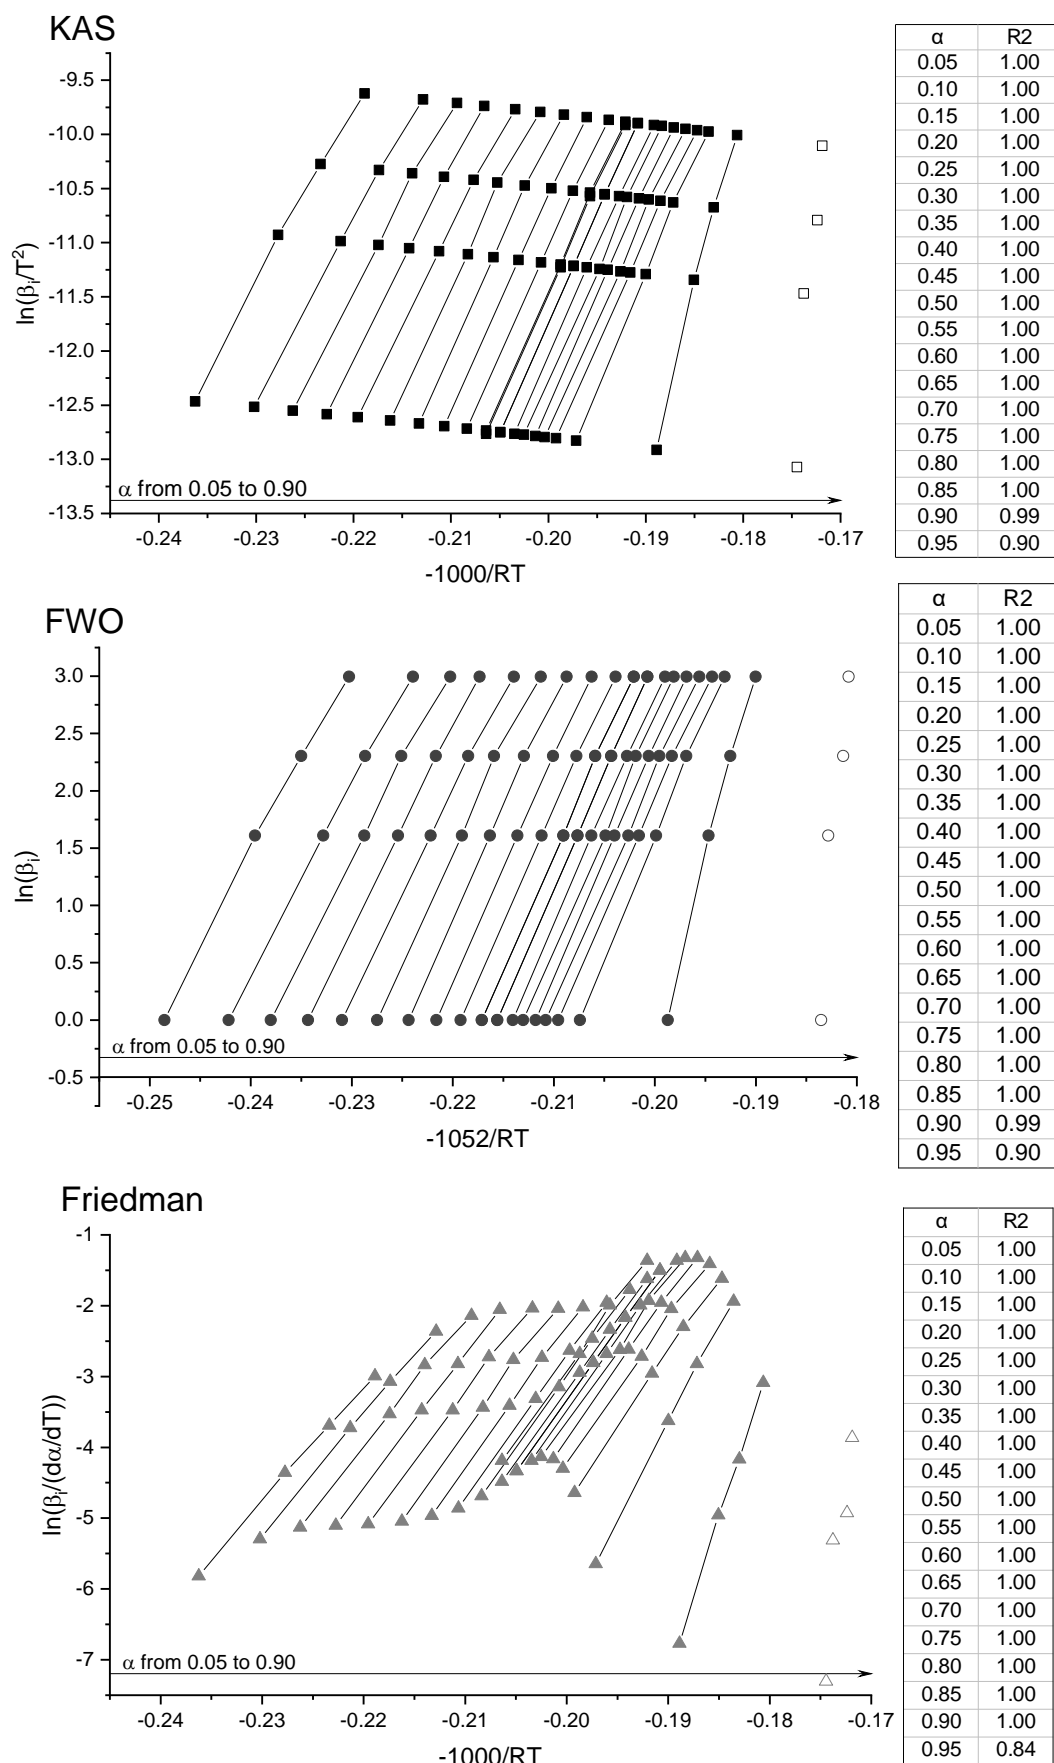

Figure S14: Arrhenius plots for the isoconversional methods for Beech.



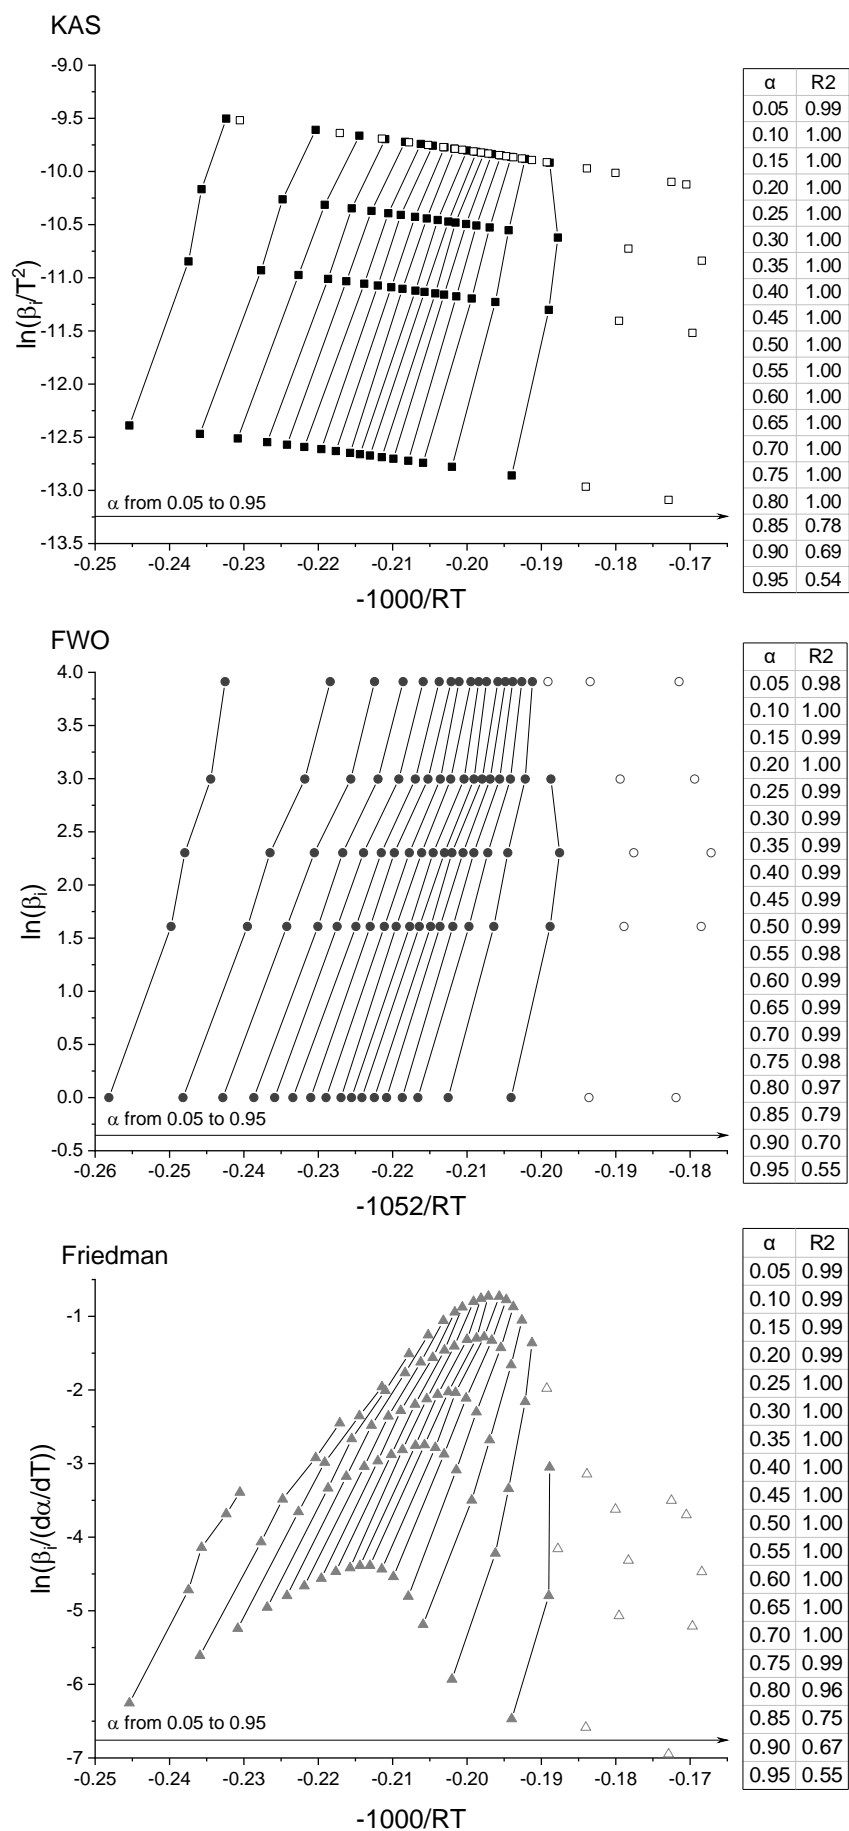

Figure S15: Arrhenius plots for the isoconversional methods for WS-P.

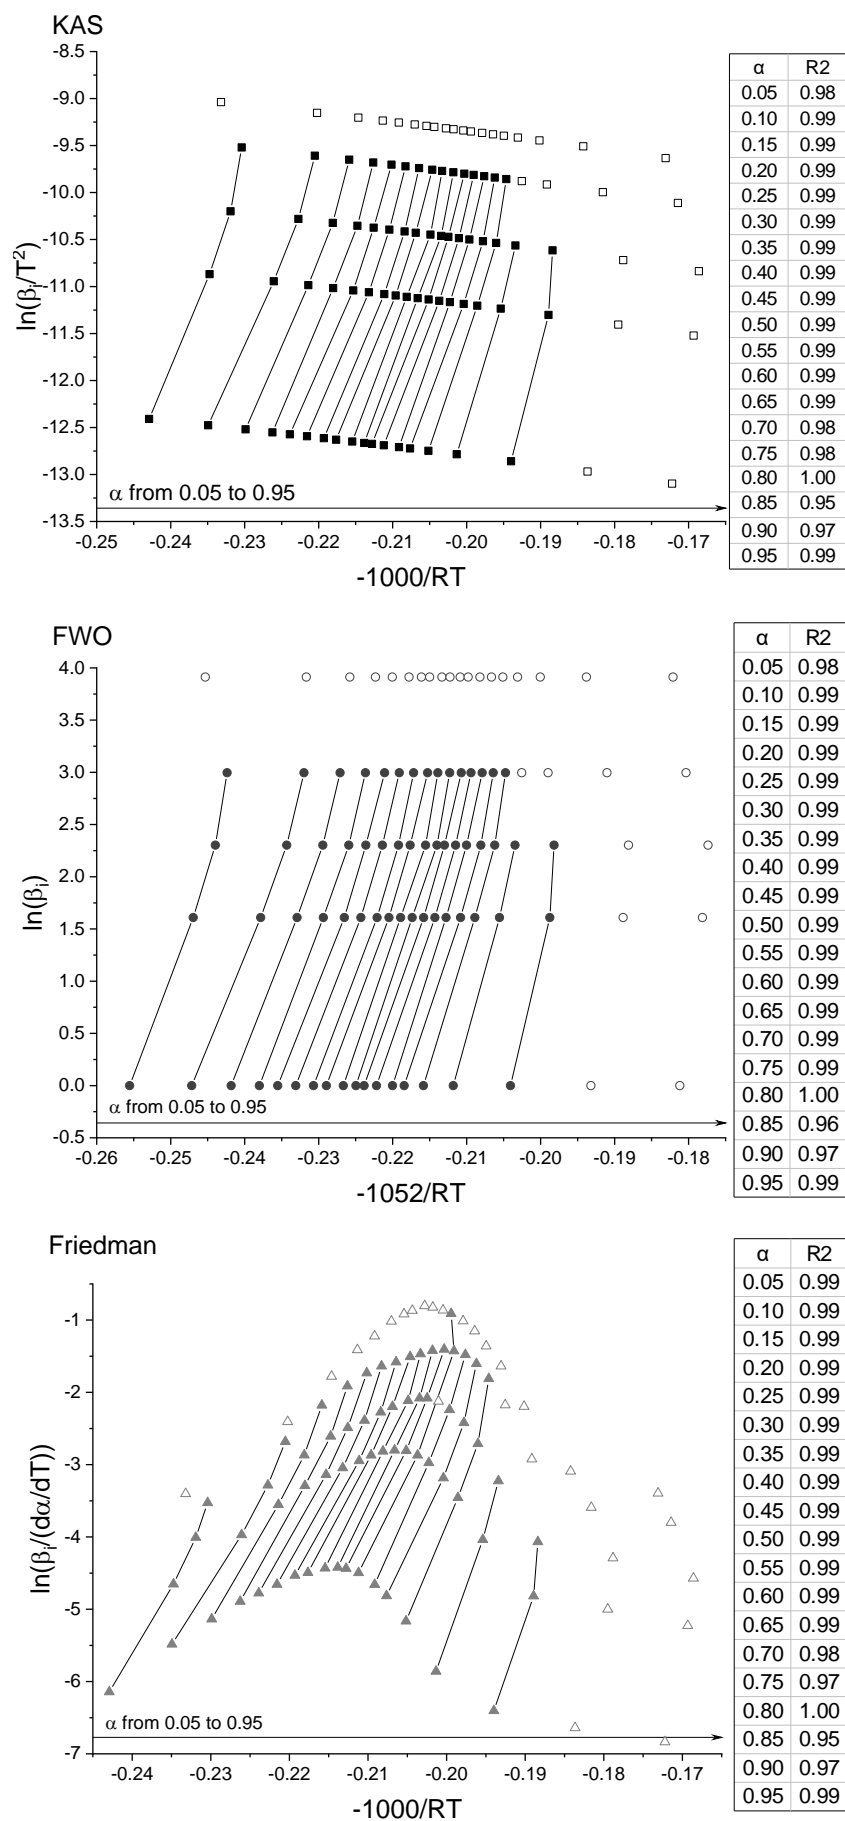

Figure S16: Arrhenius plots for the isoconversional methods for WS-H.

## Comparison of results – Isoconversional and Model-fitting

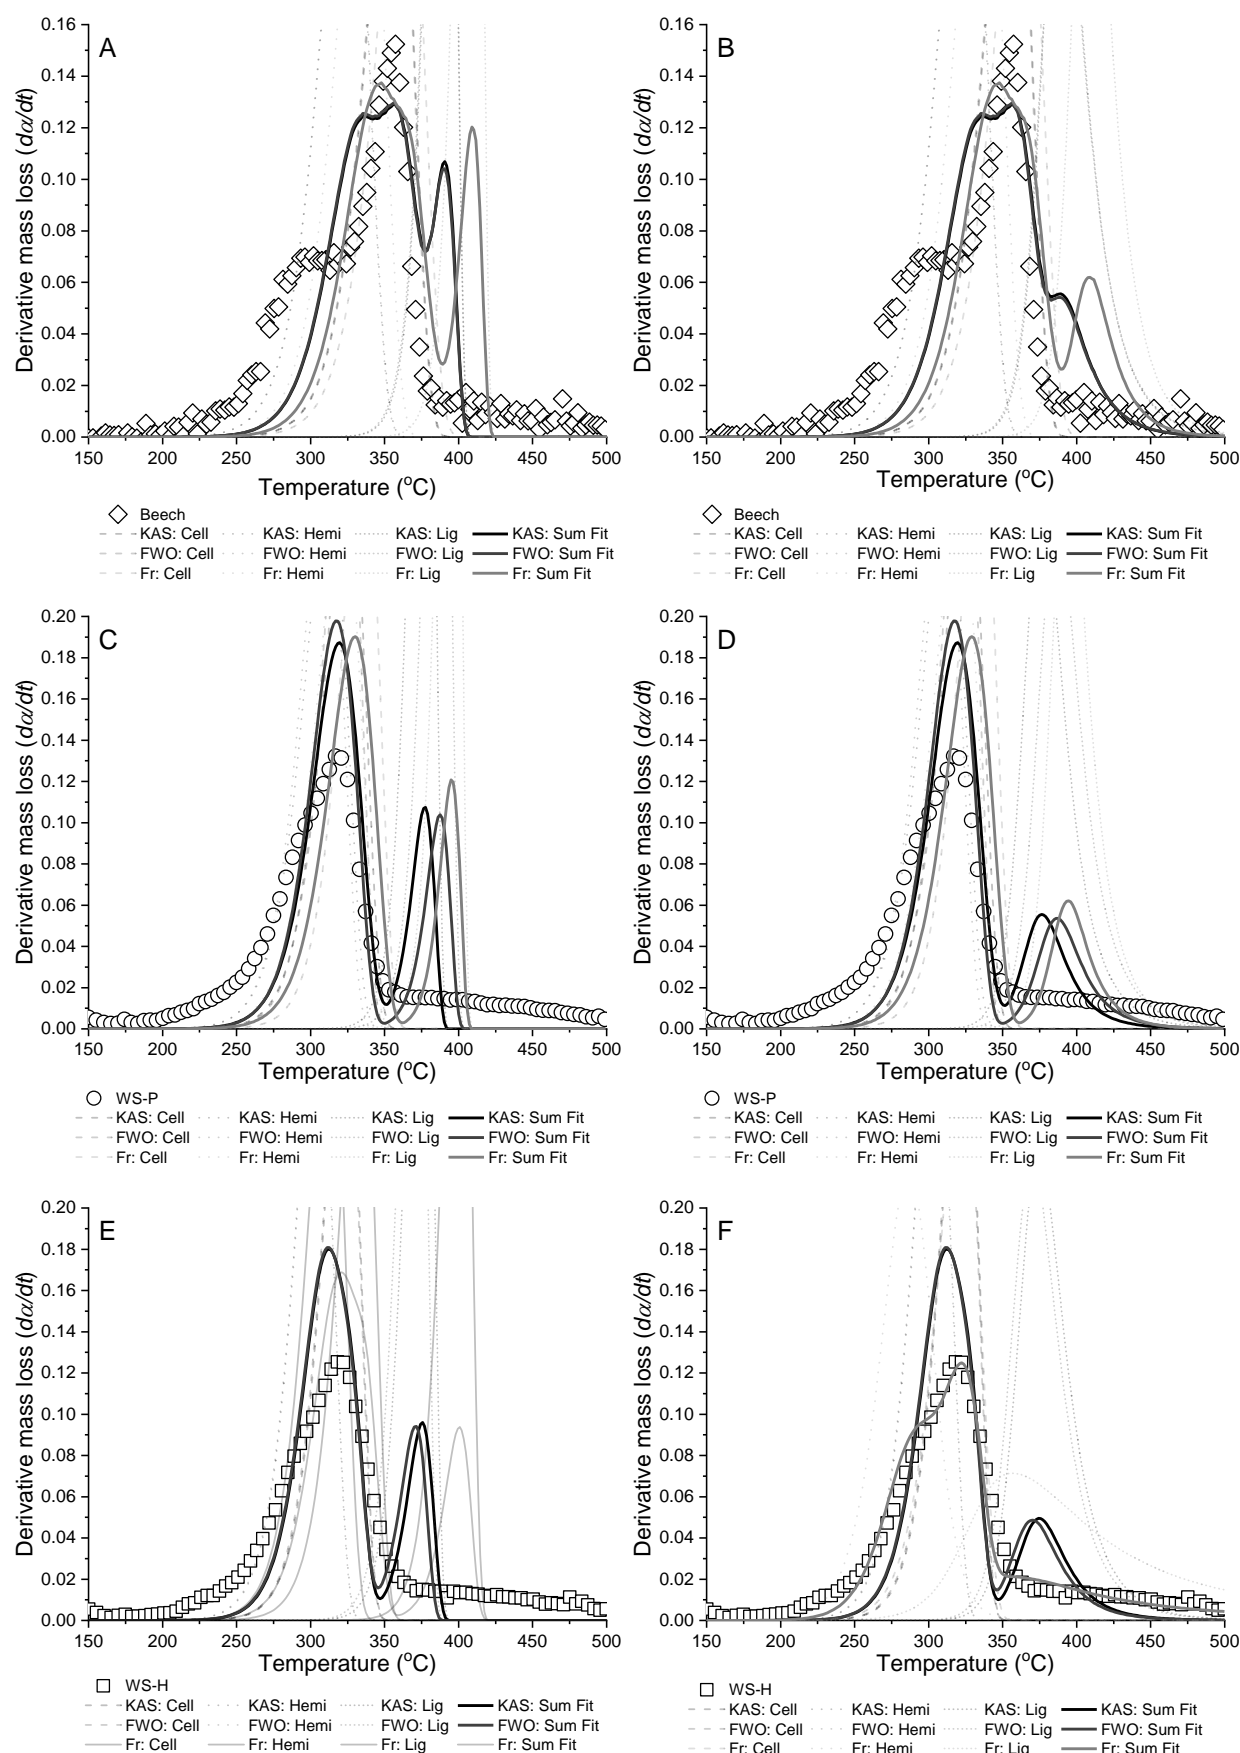

Figure S17: Comparison of degradation behavior using curves traced using the estimated isoconversional methods and the experimental data at 10 K/min. A: Beech,  $n_3=1$ ; B: Beech,  $n_3=3$ ; C: WS-P,  $n_3=1$ ; D: WS-P,  $n_3=3$ ; E: WS-W,  $n_3=1$ ; F: WS-W,  $n_3=3$ . Fr = Friedman method.

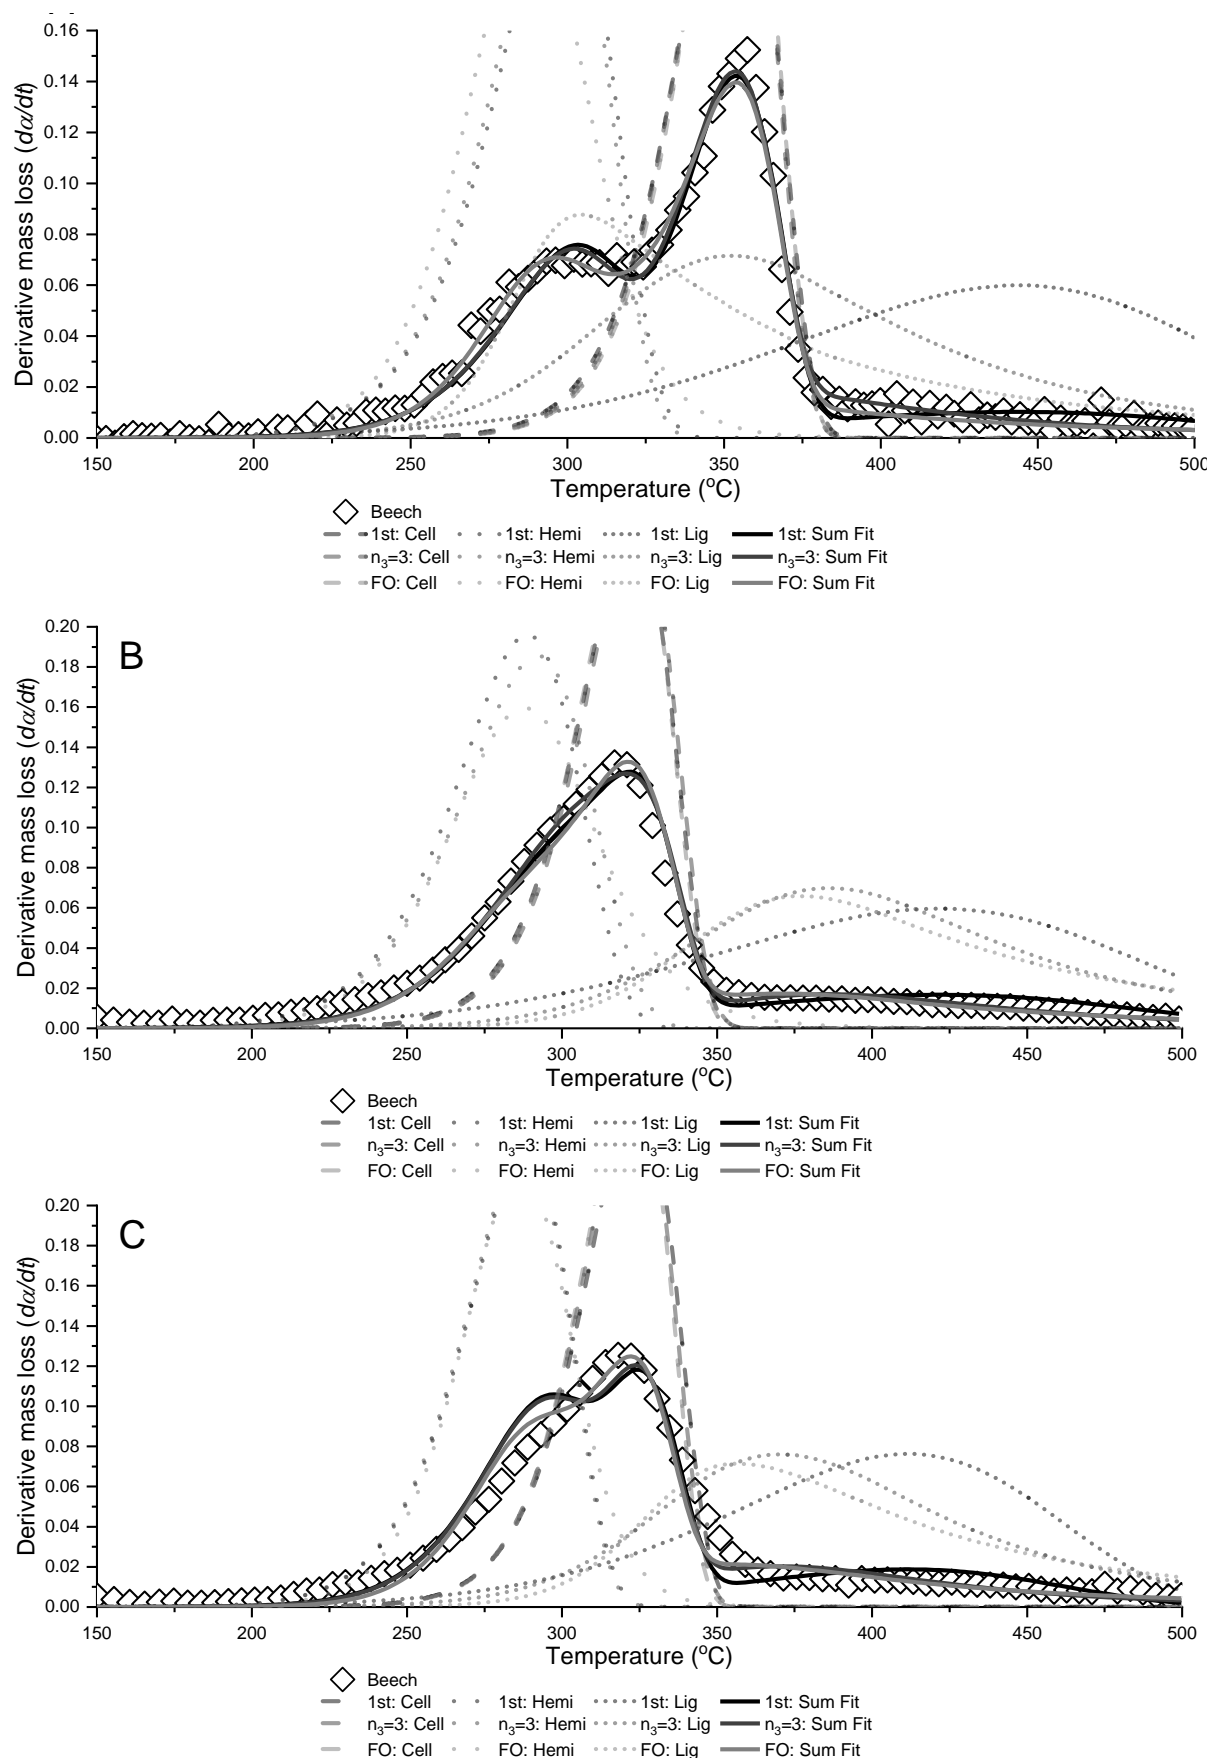

Figure S18: Comparison of degradation behavior using curves traced using the estimated curve-fitting methods and the experimental data at 10 K/min. A: Beech; B: WS-P; C: WS-W. FO = Free-order.

## Reaction Networks

All the kinetics assume first-order (also called power law), which can vary with the operational temperature:

$$r = AT^n \exp\left(\frac{E_a}{RT}\right)$$

Table S13: Reaction network from Ranzi et al. [11].

| Group         | # |                                                                                                                                                                              | E <sub>a</sub><br>(kJ/mol) | log <sub>10</sub> [A<br>(s <sup>-1</sup> )] | T <sup>n</sup> |
|---------------|---|------------------------------------------------------------------------------------------------------------------------------------------------------------------------------|----------------------------|---------------------------------------------|----------------|
| Cellulose     | 1 | CELLULOS → CELL-ACT                                                                                                                                                          | 192.28                     | 13.90                                       | 0              |
|               | 2 | CELL-ACT → 0.95 HAA + 0.25 GLYOXAL + 0.2 ACETALDY + 0.25 HMF + 0.2 CO <sub>2</sub> + 0.15 CO + 0.9 WATER + 0.65 C + 0.2 ACETONE + 0.1 H <sub>2</sub> + 0.1 CH <sub>4</sub>   | 125.40                     | 9.00                                        | 0              |
|               | 3 | CELL-ACT → LEVOGLUC                                                                                                                                                          | 41.80                      | 0.60                                        | 1              |
|               | 4 | CELLULOS → 5 WATER + 6 C                                                                                                                                                     | 133.76                     | 7.90                                        | 0              |
| Hemicellulose | 1 | HEMICELL → 0.4 HEMCELL1 + 0.6 HEMCELL2                                                                                                                                       | 129.58                     | 10.00                                       | 0              |
|               | 2 | HEMCELL1 → 2.5 H <sub>2</sub> + 0.775 CO <sub>2</sub> + CO + 0.5 FORMALDY + 0.25 METHANOL + 0.125 ETHANOL + 0.125 WATER + 2 C                                                | 112.86                     | 9.48                                        | 0              |
|               | 3 | HEMCELL1 → XYLOSE                                                                                                                                                            | 45.98                      | 0.48                                        | 1              |
|               | 4 | HEMCELL2 → 0.2 CO <sub>2</sub> + 1.5 H <sub>2</sub> + 0.7 FORMALDY + 0.25 METHANOL + 0.125 ETHANOL + 0.125 WATER + 2 C + 0.8 GCO <sub>2</sub> + 0.8 GCOH <sub>2</sub>        | 137.94                     | 10.00                                       | 0              |
| Lignin        | 1 | LIGNIN-C → 0.35 LIGN-CC + 0.1 CMRYLALC + 0.08 PHENOL + 1.49 H <sub>2</sub> + WATER + 7.05 C + 1.32 GCOH <sub>2</sub>                                                         | 202.73                     | 15.60                                       | 0              |
|               | 2 | LIGNIN-H → LIGN-OH + ACETONE                                                                                                                                                 | 156.75                     | 13.30                                       | 0              |
|               | 3 | LIGNIN-O → LIGN-OH + CO <sub>2</sub>                                                                                                                                         | 106.59                     | 9.00                                        | 0              |
|               | 4 | LIGN-CC → 0.3 CMRYLALC + 0.2 PHENOL + 0.35 PROPDIAL + 1.2 H <sub>2</sub> + 0.7 WATER + 0.25 CH <sub>4</sub> + 0.25 ETHENE + 7.5 C + 0.5 GCO + 1.3 GCOH <sub>2</sub>          | 131.67                     | 6.70                                        | 0              |
|               | 5 | LIGN-OH → LIG + 0.5 H <sub>2</sub> + WATER + METHANOL + 5 C + GCO + GCOH <sub>2</sub>                                                                                        | 206.91                     | 13.00                                       | 0              |
|               | 6 | LIG → SYNAPALD                                                                                                                                                               | 50.16                      | 1.90                                        | 1              |
|               | 7 | LIG → WATER + 0.5 CO + 0.4 CH <sub>4</sub> + 0.4 FORMALDY + 0.5 ETHENE + 6 C + 0.7 H <sub>2</sub> + 0.4 METHANOL + 0.2 ACETALDY + 0.2 PROPDIAL + GCO + 0.5 GCOH <sub>2</sub> | 125.40                     | 9.08                                        | 0              |

Table S14: Reaction network from Ranzi et al. [11] and Faravelli et al. [13], and modified by Peters et al. [54].

| Group         | #  |                                                                                                                                                                            | E <sub>a</sub><br>(kJ/mol) | log <sub>10</sub> [A<br>(s <sup>-1</sup> )] | T <sup>n</sup> |
|---------------|----|----------------------------------------------------------------------------------------------------------------------------------------------------------------------------|----------------------------|---------------------------------------------|----------------|
| Cellulose     | 1  | CELLULOS → CELL-ACT                                                                                                                                                        | 221.12                     | 13.90                                       | 0              |
|               | 2  | CELL-ACT → 0.95 HAA + 0.25 GLYOXAL + 0.2 ACETALDY + 0.25 HMF + 0.2 CO <sub>2</sub> + 0.15 CO + 0.9 WATER + 0.65 C + 0.2 ACETONE + 0.1 H <sub>2</sub> + 0.1 CH <sub>4</sub> | 125.40                     | 9.00                                        | 0              |
|               | 3  | CELL-ACT → LEVOGLUC                                                                                                                                                        | 41.80                      | 0.60                                        | 1              |
|               | 4  | CELLULOS → 5 WATER + 6 C                                                                                                                                                   | 153.82                     | 7.90                                        | 0              |
| Hemicellulose | 1  | HEMICELL → 0.4 HEMCELL1 + 0.6 HEMCELL2                                                                                                                                     | 129.58                     | 10.00                                       | 0              |
|               | 2  | HEMICELL1 → 2.5 H <sub>2</sub> + 0.775 CO <sub>2</sub> + CO + 0.5 FORMALDY + 0.25 METHANOL + 0.125 ETHANOL + 0.125 WATER + 2 C                                             | 11.29                      | 9.48                                        | 0              |
|               | 3  | HEMICELL1 → XYLOSE                                                                                                                                                         | 45.98                      | 0.48                                        | 1              |
|               | 4  | HEMICELL2 → 0.2 CO <sub>2</sub> + 1.5 H <sub>2</sub> + 0.7 FORMALDY + 0.25 METHANOL + 0.125 ETHANOL + 0.125 WATER + 2 C + 0.8 GCO <sub>2</sub> + 0.8 GCOH <sub>2</sub>     | 137.94                     | 9.90                                        | 0              |
| Lignin        | 1  | 1LIGH → PROPENE + 1ROH + 1RLIGM2A                                                                                                                                          | 163.25                     | 13.00                                       | 0              |
|               | 2  | LIGNIN-H → 1PRLIGH + 1RH                                                                                                                                                   | 163.25                     | 13.00                                       | 0              |
|               | 3  | 1LIGM2 → 1RPHOXM2 + 1RADIOM2                                                                                                                                               | 163.25                     | 13.00                                       | 0              |
|               | 4  | LIGN-OH → 1PRLGM2A + 1RH                                                                                                                                                   | 163.25                     | 13.00                                       | 0              |
|               | 5  | LIGN-OH + 1RH → 1RPHOXM2 + 1RADIOM2                                                                                                                                        | 163.25                     | 13.00                                       | 0              |
|               | 6  | 1LIG → 1RPHENOX + 1RADIO                                                                                                                                                   | 184.18                     | 13.00                                       | 0              |
|               | 7  | LIGNIN-C → 1PRLIG-A + 1RH                                                                                                                                                  | 184.18                     | 13.00                                       | 0              |
|               | 8  | LIGNIN-C → 1RPHENOX + 1PRADIO                                                                                                                                              | 188.37                     | 13.00                                       | 0              |
|               | 9  | 1PADIOM2 → 1RADIOM2                                                                                                                                                        | 171.63                     | 13.00                                       | 0              |
|               | 10 | 1PADIO → 1PRADIO + 1RH                                                                                                                                                     | 180.00                     | 13.00                                       | 0              |
|               | 11 | 1PKETM2 → 1PRKETM2 + 1RH                                                                                                                                                   | 167.44                     | 13.00                                       | 0              |
|               | 12 | 1PLIGC → LIGNIN-C + KETEN-01                                                                                                                                               | 121.39                     | 8.00                                        | 0              |
|               | 13 | LIGNIN-O → LIGN-OH + CO <sub>2</sub>                                                                                                                                       | 108.84                     | 9.00                                        | 0              |

Table S15: Reaction network from Corbetta et al. [19]. Hemicellulose assumed to be xylan-rich based on the conclusions of Peng and Wu [52].

| Group         | # |                                                                                                                                                                                                                                                                                              | E <sub>a</sub><br>(kJ/mol) | log <sub>10</sub> [A<br>(s <sup>-1</sup> )] | T <sup>n</sup> |
|---------------|---|----------------------------------------------------------------------------------------------------------------------------------------------------------------------------------------------------------------------------------------------------------------------------------------------|----------------------------|---------------------------------------------|----------------|
| Cellulose     | 1 | CELL → CELLA                                                                                                                                                                                                                                                                                 | 188.10                     | 13.60                                       | 0              |
|               | 2 | CELLA → 0.8 HAA + 0.2 GLYOXAL + 0.1 ACETALDY + 0.25 HMF + 0.3 ACETONE + 0.21 CO <sub>2</sub> + 0.1 H <sub>2</sub> + 0.4 FORMALDY + 0.16 CO + 0.1 CH <sub>4</sub> + 0.83 WATER + 0.02 FORMICAC + 0.61 C                                                                                       | 121.22                     | 8.70                                        | 0              |
|               | 3 | CELLA → LEVOGLUC                                                                                                                                                                                                                                                                             | 41.80                      | 0.26                                        | 1              |
|               | 4 | CELL → 5 WATER + 6 C                                                                                                                                                                                                                                                                         | 163.02                     | 7.60                                        | 0              |
| Hemicellulose | 1 | XYHW → 0.4 HEM1 + 0.6 HEM2                                                                                                                                                                                                                                                                   | 129.58                     | 9.52                                        | 0              |
|               | 2 | HEM1 → 0.025 WATER + 0.5 CO <sub>2</sub> + 0.025 FORMICAC + 0.5 CO + 0.8 FORMALDY + 0.125 ETHANOL + 0.1 METHANOL + 0.25 C <sub>2</sub> H <sub>4</sub> + 0.125 GH <sub>2</sub> + 0.275 GCO <sub>2</sub> + 0.4 GCOH <sub>2</sub> + 0.45 GCH <sub>3</sub> OH + 0.325 GCH <sub>4</sub> + 0.875 C | 133.76                     | 9.00                                        | 0              |
|               | 3 | HEM1 → 0.25 WATER + 0.5 CO <sub>2</sub> + 0.05 FORMICAC + 0.3 CO + 0.15 GCO + 0.25 GCO <sub>2</sub> + 1.7 GCOH <sub>2</sub> + 0.625 GCH <sub>4</sub> + 0.375 GC <sub>2</sub> H <sub>4</sub> + 0.875 C                                                                                        | 45.98                      | -0.05                                       | 1              |
|               | 4 | HEM1 → XYLOSAN                                                                                                                                                                                                                                                                               | 33.44                      | -1.30                                       | 1              |
|               | 5 | HEM2 → 0.2 WATER + 0.175 CO + 0.275 CO <sub>2</sub> + 0.5 FORMALDY + 0.1 ETHANOL + 0.2 HAA + 0.025 FORMICAC + 0.25 GCH <sub>4</sub> + 0.3 GCH <sub>3</sub> OH + 0.275 GC <sub>2</sub> H <sub>4</sub> + 0.4 GCO <sub>2</sub> + 0.925 GCOH <sub>2</sub> + C                                    | 137.94                     | 9.52                                        | 0              |
| Lignin        | 1 | LIGC → 0.35 LIGCC + 0.1 CMRYLALC + 0.08 PHENOL + 0.41 C <sub>2</sub> H <sub>4</sub> + WATER + 0.3 FORMALDY + 0.32 CO + 0.7 GCOH <sub>2</sub> + 0.495 GCH <sub>4</sub> + 5.735 C                                                                                                              | 202.73                     | 15.12                                       | 0              |
|               | 2 | LIGH → LIGO + ACETONE                                                                                                                                                                                                                                                                        | 156.75                     | 12.83                                       | 0              |
|               | 3 | LIGO → LIGO + GCO <sub>2</sub>                                                                                                                                                                                                                                                               | 106.59                     | 8.52                                        | 0              |
|               | 4 | LIGCC → 0.3 CMRYLALC + 0.2 PHENOL + 0.35 HAA + 0.7 WATER + 0.4 CO + 0.65 GCH <sub>4</sub> + 0.6 GC <sub>2</sub> H <sub>4</sub> + GCOH <sub>2</sub> + 0.4 GCO + 6.75 C                                                                                                                        | 131.67                     | 6.20                                        | 0              |
|               | 5 | LIGO → LIG + 0.15 GH <sub>2</sub> + 0.9 WATER + 0.1 CH <sub>4</sub> + 0.5 METHANOL + 0.5 GCH <sub>3</sub> OH + 0.05 CO <sub>2</sub> + 0.3 CO + GCO + 0.05 FORMICAC + 0.6 GCOH <sub>2</sub> + 0.35 GCH <sub>4</sub> + 0.2 GC <sub>2</sub> H <sub>4</sub> + 4.15 C                             | 125.40                     | 7.70                                        | 0              |
|               | 6 | LIGO → 1.5 WATER + 0.5 CO + 0.1 CH <sub>4</sub> + 0.5 GH <sub>2</sub> + 1.6 GCO + 3.9 GCOH <sub>2</sub> + 1.65 GCH <sub>4</sub> + 0.3 GC <sub>2</sub> H <sub>4</sub> + 0.5 GCH <sub>3</sub> OH + 10.15 C                                                                                     | 62.70                      | 1.52                                        | 1              |
|               | 7 | LIG → SYNAPALD                                                                                                                                                                                                                                                                               | 50.16                      | 0.38                                        | 1              |
|               | 8 | LIG → 0.95 WATER + 0.2 FORMALDY + 0.4 METHANOL + CO + 0.2 CH <sub>4</sub> + 0.05 FORMICAC + 0.45 GCO + 0.5 GCOH <sub>2</sub> + 0.4 GCH <sub>4</sub> + 0.65 GC <sub>2</sub> H <sub>4</sub> + 0.2 ACETALDY + 0.2 ACETONE + 5.5 C                                                               | 125.40                     | 8.60                                        | 0              |
|               | 9 | LIG → 0.6 WATER + 0.4 CO + 0.2 CH <sub>4</sub> + 0.4 FORMALDY + 0.2 GCO + 0.4 GCH <sub>4</sub> + 0.5 GC <sub>2</sub> H <sub>4</sub> + 0.4 GCH <sub>3</sub> OH + 2 GCOH <sub>2</sub> + 6 C                                                                                                    | 33.44                      | -1.08                                       | 1              |

Table S16: Reaction network from Anca-Couce and Scharler [12], assuming low charring conditions as reported by Pecha et al. [23].

| Group         | # |                                                                                                                                                                                                                                                                                                                                                | E <sub>a</sub><br>(kJ/mol) | log <sub>10</sub> [A<br>(s <sup>-1</sup> )] | T <sup>n</sup> |
|---------------|---|------------------------------------------------------------------------------------------------------------------------------------------------------------------------------------------------------------------------------------------------------------------------------------------------------------------------------------------------|----------------------------|---------------------------------------------|----------------|
| Cellulose     | 1 | CELLULOS → CELL-ACT                                                                                                                                                                                                                                                                                                                            | 188.37                     | 13.60                                       | 0              |
|               | 2 | CELL-ACT → 0.43875 HAA + 0.195 GLYOXAL + 0.2925 ACETONE + 0.24375 HMF + 0.07375 H <sub>2</sub> + 0.30225 CO + 0.41225 CO <sub>2</sub> + 0.39 FORMALDY + 0.14625 METHANOL + 0.0975 ACETALDY + 0.90925 WATER + 0.0195 FORMICAC + 0.04875 GH <sub>2</sub> + 0.195 GCH <sub>4</sub> + 0.73225 C                                                    | 80.00                      | 6.30                                        | 0              |
|               | 3 | CELL-ACT → 0.975 LEVOGLUC + 0.1375 C + 0.1 WATER + 0.0125 CO <sub>2</sub> + 0.025 H <sub>2</sub>                                                                                                                                                                                                                                               | 41.86                      | 0.60                                        | 1              |
| Hemicellulose | 1 | HEMICELL → 0.58 HEMCELL1 + 0.42 HEMCELL2 + 0.4 ACETICAC                                                                                                                                                                                                                                                                                        | 129.77                     | 10.00                                       | 0              |
|               | 2 | HEMICELL1 → 0.475 CO + 0.5 CO <sub>2</sub> + 0.30875 CH <sub>4</sub> + 0.76 FORMALDY + 0.095 METHANOL + 0.2375 C <sub>2</sub> H <sub>4</sub> + 0.11875 ETHANOL + 0.17375 WATER + 0.02375 FORMICAC + 0.26125 GCO <sub>2</sub> + 0.38 GCOH <sub>2</sub> + 0.11875 GH <sub>2</sub> + 0.4275 GCH <sub>3</sub> OH + 1.05625 C + 0.05 H <sub>2</sub> | 125.58                     | 9.08                                        | 0              |
|               | 3 | HEMICELL1 → 0.095 CO + 0.785 CO <sub>2</sub> + 0.285 FORMALDY + 0.3875 WATER + 0.0475 FORMICAC + 0.1425 GCO <sub>2</sub> + 0.1425 GCO + 1.14 GCOH <sub>2</sub> + 0.19 GH <sub>2</sub> + 0.59375 GCH <sub>4</sub> + 0.35625 GC <sub>2</sub> H <sub>4</sub> + 1.05625 C + 0.05 H <sub>2</sub>                                                    | 33.50                      | -0.82                                       | 1              |
|               | 4 | HEMICELL1 → 0.95 XYLOSAN + 0.225 C + 0.15 WATER + 0.025 CO <sub>2</sub> + 0.05 H <sub>2</sub>                                                                                                                                                                                                                                                  | 46.05                      | 0.48                                        | 1              |
|               | 5 | HEMICELL2 → 0.19 HAA + 0.16625 CO + 0.29 CO <sub>2</sub> + 0.475 FORMALDY + 0.095 ETHANOL + 0.34 WATER + 0.02375 FORMICAC + 0.38 GCO <sub>2</sub> + 0.87875 GCOH <sub>2</sub> + 0.2375 GCH <sub>4</sub> + 0.285 GCH <sub>3</sub> OH + 0.26125 GC <sub>2</sub> H <sub>4</sub> + 1.18 C + 0.05 H <sub>2</sub>                                    | 138.14                     | 9.70                                        | 0              |
| Lignin        | 1 | LIGNIN-C → 0.35 LIGN-CC + 0.1 CMRYLALC + 0.08 PHENOL + 0.32 CO + 0.3 FORMALDY + WATER + 0.7 GCOH <sub>2</sub> + 0.495 GCH <sub>4</sub> + 0.41 GC <sub>2</sub> H <sub>4</sub> + 5.735 C                                                                                                                                                         | 203.02                     | 15.12                                       | 0              |
|               | 2 | LIGNIN-H → LIGN-OH + 0.25 HAA + 0.5 ACETONE + 5 GC <sub>2</sub> H <sub>4</sub>                                                                                                                                                                                                                                                                 | 156.97                     | 12.83                                       | 0              |
|               | 3 | LIGNIN-O → LIGN-OH + CO <sub>2</sub>                                                                                                                                                                                                                                                                                                           | 106.74                     | 8.52                                        | 0              |
|               | 4 | LIGN-CC → 0.315 HAA + 0.27 CMRYLALC + 0.18 PHENOL + 0.36 CO + 0.585 CH <sub>4</sub> + 0.54 C <sub>2</sub> H <sub>4</sub> + 1.03 WATER + 0.36 GCO + 0.9 GCOH <sub>2</sub> + 7.575 C + 0.3 H <sub>2</sub>                                                                                                                                        | 131.86                     | 7.48                                        | 0              |
|               | 5 | LIGN-OH → LIG + 0.55 CO + 0.05 CO <sub>2</sub> + 0.1 CH <sub>4</sub> + 0.6 METHANOL + 0.9 WATER + 0.05 FORMICAC + 0.6 GCO + 0.85 GCOH <sub>2</sub> + 0.1 GH <sub>2</sub> + 0.35 GCH <sub>4</sub> + 0.3 GCH <sub>3</sub> OH + 0.2 GC <sub>2</sub> H <sub>4</sub> + 4.15 C                                                                       | 125.58                     | 8.00                                        | 0              |
|               | 6 | LIG → 0.9 SYNAPALD + 1.1 C + 0.3 WATER + 0.1 CO <sub>2</sub> + 0.3 H <sub>2</sub>                                                                                                                                                                                                                                                              | 50.20                      | 0.60                                        | 1              |
|               | 7 | LIG → 0.18 ACETONE + 0.9 CO + 0.18 CH <sub>4</sub> + 0.18 FORMALDY + 0.36 METHANOL + 0.18 ACETALDY + 1.155 WATER + 0.045 FORMICAC + 0.405 GCO + 0.45 GCOH <sub>2</sub> + 0.36 GCH <sub>4</sub> + 0.585 GC <sub>2</sub> H <sub>4</sub> + 6 C + 0.05 CO <sub>2</sub> + 0.3 H <sub>2</sub>                                                        | 125.58                     | 8.60                                        | 0              |
|               | 8 | LIG → 0.36 CO + 0.18 CH <sub>4</sub> + 0.36 FORMALDY + 0.84 WATER + 0.18 GCO + 1.8 GCOH <sub>2</sub> + 0.36 GCH <sub>4</sub> + 0.36 GCH <sub>3</sub> OH + 0.45 GC <sub>2</sub> H <sub>4</sub> + 6.45 C + 0.05 CO <sub>2</sub> + 0.3 H <sub>2</sub>                                                                                             | 33.50                      | -1.08                                       | 1              |
| Extractives   | 1 | TANN → PHENOL + ITANN                                                                                                                                                                                                                                                                                                                          | 46.02                      | 1.70                                        | 0              |
|               | 2 | ITANN → 5 C + 3 CO + GCOH <sub>2</sub> + 2 WATER                                                                                                                                                                                                                                                                                               | 25.52                      | 3.79                                        | 0              |
|               | 3 | TGL → ACROLEIN + 3 FFA                                                                                                                                                                                                                                                                                                                         | 191.20                     | 12.85                                       | 0              |



Table S17: Reaction network from Anca-Couce and Scharler [12], assuming high charring conditions as reported by Pecha et al. [23].

| Group         | # |                                                                                                                                                                                                                                                                                                               | E <sub>a</sub><br>(kJ/mol) | log <sub>10</sub> [A<br>(s <sup>-1</sup> )] | T <sup>n</sup> |
|---------------|---|---------------------------------------------------------------------------------------------------------------------------------------------------------------------------------------------------------------------------------------------------------------------------------------------------------------|----------------------------|---------------------------------------------|----------------|
| Cellulose     | 1 | CELLULOS → CELL-ACT                                                                                                                                                                                                                                                                                           | 188.37                     | 13.60                                       | 0              |
|               | 2 | CELL-ACT → 0.405 HAA + 0.18 GLYOXAL + 0.27 ACETONE + 0.225 HMF + 0.145 H <sub>2</sub> + 0.279 CO + 0.419 CO <sub>2</sub> + 0.36 FORMALDY + 0.135 METHANOL + 0.09 ACETALDY + 1.147 WATER + 0.018 FORMICAC + 0.045 GH <sub>2</sub> + 0.18 GCH <sub>4</sub> + 1.099 C                                            | 80.00                      | 6.30                                        | 0              |
|               | 3 | CELL-ACT → 0.405 HAA + 0.18 GLYOXAL + 0.27 ACETONE + 0.225 HMF + 0.145 H <sub>2</sub> + 0.279 CO + 0.419 CO <sub>2</sub> + 0.36 FORMALDY + 0.135 METHANOL + 0.09 ACETALDY + 1.147 WATER + 0.018 FORMICAC + 0.045 GH <sub>2</sub> + 0.18 GCH <sub>4</sub> + 1.099 C                                            | 41.86                      | 0.60                                        | 1              |
| Hemicellulose | 1 | HEMICELL → 0.58 HEMCELL1 + 0.42 HEMCELL2 + 0.4 ACETICAC                                                                                                                                                                                                                                                       | 129.77                     | 10.00                                       | 0              |
|               | 2 | HEMICELL1 → 0.4 CO + 0.5 CO <sub>2</sub> + 0.26 CH <sub>4</sub> + 0.64 FORMALDY + 0.08 METHANOL + 0.2 C <sub>2</sub> H <sub>4</sub> + 0.1 ETHANOL + 0.62 WATER + 0.02 FORMICAC + 0.22 GCO <sub>2</sub> + 0.32 GCOH <sub>2</sub> + 0.1 GH <sub>2</sub> + 0.36 GCH <sub>3</sub> OH + 1.6 C + 0.2 H <sub>2</sub> | 125.58                     | 9.08                                        | 0              |
|               | 3 | HEMICELL1 → 0.08 CO + 0.74 CO <sub>2</sub> + 0.24 FORMALDY + 0.8 WATER + 0.04 FORMICAC + 0.12 GCO <sub>2</sub> + 0.12 GCO + 0.96 GCOH <sub>2</sub> + 0.16 GH <sub>2</sub> + 0.5 GCH <sub>4</sub> + 0.3 GC <sub>2</sub> H <sub>4</sub> + 1.6 C + 0.2 H <sub>2</sub>                                            | 33.50                      | -0.82                                       | 1              |
|               | 4 | HEMICELL1 → 0.08 CO + 0.74 CO <sub>2</sub> + 0.24 FORMALDY + 0.8 WATER + 0.04 FORMICAC + 0.12 GCO <sub>2</sub> + 0.12 GCO + 0.96 GCOH <sub>2</sub> + 0.16 GH <sub>2</sub> + 0.5 GCH <sub>4</sub> + 0.3 GC <sub>2</sub> H <sub>4</sub> + 1.6 C + 0.2 H <sub>2</sub>                                            | 46.05                      | 0.48                                        | 1              |
|               | 5 | HEMICELL2 → 0.16 HAA + 0.14 CO + 0.32 CO <sub>2</sub> + 0.4 FORMALDY + 0.08 ETHANOL + 0.76 WATER + 0.02 FORMICAC + 0.32 GCO <sub>2</sub> + 0.74 GCOH <sub>2</sub> + 0.2 GCH <sub>4</sub> + 0.24 GCH <sub>3</sub> OH + 0.22 GC <sub>2</sub> H <sub>4</sub> + 1.7 C + 0.2 H <sub>2</sub>                        | 138.14                     | 9.70                                        | 0              |
| Lignin        | 1 | LIGNIN-C → 0.35 LIGN-CC + 0.1 CMRYLALC + 0.08 PHENOL + 0.32 CO + 0.3 FORMALDY + WATER + 0.7 GCOH <sub>2</sub> + 0.495 GCH <sub>4</sub> + 0.41 GC <sub>2</sub> H <sub>4</sub> + 5.735 C                                                                                                                        | 203.02                     | 15.12                                       | 0              |
|               | 2 | LIGNIN-H → LIGN-OH + 0.25 HAA + 0.5 ACETONE + 5 GC <sub>2</sub> H <sub>4</sub>                                                                                                                                                                                                                                | 156.97                     | 12.83                                       | 0              |
|               | 3 | LIGNIN-O → LIGN-OH + CO <sub>2</sub>                                                                                                                                                                                                                                                                          | 106.74                     | 8.52                                        | 0              |
|               | 4 | LIGN-CC → 0.21 HAA + 0.18 CMRYLALC + 0.12 PHENOL + 0.24 CO + 0.39 CH <sub>4</sub> + 0.36 C <sub>2</sub> H <sub>4</sub> + 2.02 WATER + 0.24 GCO + 0.6 GCOH <sub>2</sub> + 10.05 C + 1.2 H <sub>2</sub>                                                                                                         | 131.86                     | 7.48                                        | 0              |
|               | 5 | LIGN-OH → LIG + 0.55 CO + 0.05 CO <sub>2</sub> + 0.1 CH <sub>4</sub> + 0.6 METHANOL + 0.9 WATER + 0.05 FORMICAC + 0.6 GCO + 0.85 GCOH <sub>2</sub> + 0.1 GH <sub>2</sub> + 0.35 GCH <sub>4</sub> + 0.3 GCH <sub>3</sub> OH + 0.2 GC <sub>2</sub> H <sub>4</sub> + 4.15 C                                      | 125.58                     | 8.00                                        | 0              |
|               | 6 | LIG → 0.6 SYNAPALD + 4.2 C + 1.2 WATER + 0.2 CO <sub>2</sub> + 1.2 H <sub>2</sub>                                                                                                                                                                                                                             | 50.20                      | 0.60                                        | 1              |
|               | 7 | LIG → 0.12 ACETONE + 0.6 CO + 0.12 CH <sub>4</sub> + 0.12 FORMALDY + 0.24 METHANOL + 0.12 ACETALDY + 1.77 WATER + 0.03 FORMICAC + 0.27 GCO + 0.3 GCOH <sub>2</sub> + 0.24 GCH <sub>4</sub> + 0.39 GC <sub>2</sub> H <sub>4</sub> + 8 C + 0.2 CO <sub>2</sub> + 1.2 H <sub>2</sub>                             | 125.58                     | 8.60                                        | 0              |
|               | 8 | LIG → 0.24 CO + 0.12 CH <sub>4</sub> + 0.24 FORMALDY + 1.56 WATER + 0.12 GCO + 1.2 GCOH <sub>2</sub> + 0.24 GCH <sub>4</sub> + 0.24 GCH <sub>3</sub> OH + 0.3 GC <sub>2</sub> H <sub>4</sub> + 7.8 C + 0.2 CO <sub>2</sub> + 1.2 H <sub>2</sub>                                                               | 33.50                      | -1.08                                       | 1              |
| Extractives   | 1 | TANN → PHENOL + ITANN                                                                                                                                                                                                                                                                                         | 46.02                      | 1.70                                        | 0              |
|               | 2 | ITANN → 5 C + 3 CO + GCOH <sub>2</sub> + 2 WATER                                                                                                                                                                                                                                                              | 25.52                      | 3.79                                        | 0              |
|               | 3 | TGL → ACROLEIN + 3 FFA                                                                                                                                                                                                                                                                                        | 191.20                     | 12.85                                       | 0              |

Table S18: Reaction network from Ranzi et al. [20]. Hemicellulose assumed to be xylan-rich based on the conclusions of Peng and Wu [52].

| Group         | # |                                                                                                                                                                                                                                                                                              | E <sub>a</sub><br>(kJ/mol) | log <sub>10</sub> [A<br>(s <sup>-1</sup> )] | T <sup>n</sup> |
|---------------|---|----------------------------------------------------------------------------------------------------------------------------------------------------------------------------------------------------------------------------------------------------------------------------------------------|----------------------------|---------------------------------------------|----------------|
| Cellulose     | 1 | CELL → CELLA                                                                                                                                                                                                                                                                                 | 196.46                     | 14.18                                       | 0              |
|               | 2 | CELLA → 0.45 HAA + 0.2 GLYOXAL + 0.1 ACETALDY + 0.25 HMF + 0.3 NPROPALD + 0.15 METHANOL + 0.4 FORMALDY + 0.31 CO + 0.41 CO <sub>2</sub> + 0.05 H <sub>2</sub> + 0.83 WATER + 0.02 FORMICAC + 0.2 GCH <sub>4</sub> + 0.05 GH <sub>2</sub> + 0.61 C                                            | 79.84                      | 6.30                                        | 0              |
|               | 3 | CELLA → LEVOGLUC                                                                                                                                                                                                                                                                             | 41.80                      | 0.60                                        | 1              |
|               | 4 | CELL → 5 WATER + 6 C                                                                                                                                                                                                                                                                         | 129.58                     | 7.81                                        | 0              |
| Hemicellulose | 1 | XYHW → 0.58 HEM1 + 0.42 HEM2                                                                                                                                                                                                                                                                 | 129.58                     | 10.00                                       | 0              |
|               | 2 | HEM1 → 0.025 WATER + 0.5 CO <sub>2</sub> + 0.025 FORMICAC + 0.5 CO + 0.8 FORMALDY + 0.125 ETHANOL + 0.1 METHANOL + 0.25 C <sub>2</sub> H <sub>4</sub> + 0.125 GH <sub>2</sub> + 0.275 GCO <sub>2</sub> + 0.4 GCOH <sub>2</sub> + 0.45 GCH <sub>3</sub> OH + 0.325 GCH <sub>4</sub> + 0.875 C | 125.40                     | 9.08                                        | 0              |
|               | 3 | HEM1 → 0.25 WATER + 0.8 CO <sub>2</sub> + 0.05 FORMICAC + 0.1 CO + 0.15 GCO + 0.15 GCO <sub>2</sub> + 0.2 GH <sub>2</sub> + 0.3 FORMALDY + 1.2 GCOH <sub>2</sub> + 0.625 GCH <sub>4</sub> + 0.375 GC <sub>2</sub> H <sub>4</sub> + 0.875 C                                                   | 33.44                      | -0.82                                       | 1              |
|               | 4 | HEM1 → XYLOSAN                                                                                                                                                                                                                                                                               | 45.98                      | 0.48                                        | 1              |
|               | 5 | HEM2 → 0.2 WATER + 0.175 CO + 0.275 CO <sub>2</sub> + 0.5 FORMALDY + 0.1 ETHANOL + 0.2 HAA + 0.025 FORMICAC + 0.25 GCH <sub>4</sub> + 0.3 GCH <sub>3</sub> OH + 0.275 GC <sub>2</sub> H <sub>4</sub> + 0.4 GCO <sub>2</sub> + 0.925 GCOH <sub>2</sub> + C                                    | 137.94                     | 9.70                                        | 0              |
| Lignin        | 1 | LIGC → 0.35 LIGCC + 0.1 CMRYLALC + 0.08 PHENOL + 0.41 C <sub>2</sub> H <sub>4</sub> + WATER + 0.7 GCOH <sub>2</sub> + 0.3 FORMALDY + 0.32 CO + 0.495 GCH <sub>4</sub> + 5.735 C                                                                                                              | 202.73                     | 15.12                                       | 0              |
|               | 2 | LIGH → LIGO + 0.5 NPROPALD + 0.5 C <sub>2</sub> H <sub>4</sub> + 0.25 HAA                                                                                                                                                                                                                    | 156.75                     | 12.83                                       | 0              |
|               | 3 | LIGO → LIGO + CO <sub>2</sub>                                                                                                                                                                                                                                                                | 106.59                     | 8.52                                        | 0              |
|               | 4 | LIGCC → 0.3 CMRYLALC + 0.2 PHENOL + 0.35 HAA + 0.7 WATER + 0.65 GCH <sub>4</sub> + 0.6 GC <sub>2</sub> H <sub>4</sub> + GCOH <sub>2</sub> + 0.4 CO + 0.4 GCO + 6.75 C                                                                                                                        | 131.67                     | 6.22                                        | 0              |
|               | 5 | LIGO → LIG + 0.9 WATER + 0.1 CH <sub>4</sub> + 0.6 METHANOL + 0.1 GH <sub>2</sub> + 0.3 GCH <sub>3</sub> OH + 0.05 CO <sub>2</sub> + 0.55 CO + 0.6 GCO + 0.05 FORMICAC + 0.85 GCOH <sub>2</sub> + 0.35 GCH <sub>4</sub> + 0.2 GC <sub>2</sub> H <sub>4</sub> + 4.15 C                        | 125.40                     | 8.00                                        | 0              |
|               | 6 | LIG → 0.7 SYNAPALD + 0.3 ANISOLE + 0.3 CO + 0.3 GCO + 0.3 ACETALDY                                                                                                                                                                                                                           | 50.16                      | 0.60                                        | 1              |
|               | 7 | LIG → 0.95 WATER + 0.2 FORMALDY + 0.4 METHANOL + CO + 0.2 CH <sub>4</sub> + 0.05 FORMICAC + 0.45 GCO + 0.5 GCOH <sub>2</sub> + 0.4 GCH <sub>4</sub> + 0.65 GC <sub>2</sub> H <sub>4</sub> + 0.2 ACETALDY + 0.2 NPROPALD + 5.5 C                                                              | 125.40                     | 8.60                                        | 0              |
|               | 8 | LIG → 0.6 WATER + 0.4 CO + 0.2 CH <sub>4</sub> + 0.4 FORMALDY + 0.2 GCO + 0.4 GCH <sub>4</sub> + 0.5 GC <sub>2</sub> H <sub>4</sub> + 0.4 GCH <sub>3</sub> OH + 2 GCOH <sub>2</sub> + 6 C                                                                                                    | 33.44                      | -1.08                                       | 1              |
| Extractives   | 1 | TGL → ACROLEIN + 3 FFA                                                                                                                                                                                                                                                                       | 191.03                     | 12.85                                       | 0              |
|               | 2 | TANN → PHENOL + ITANN                                                                                                                                                                                                                                                                        | 45.98                      | 1.70                                        | 0              |
|               | 3 | ITANN → 6 C + 3 CO + 3 WATER                                                                                                                                                                                                                                                                 | 25.50                      | -1.82                                       | 0              |

Table S19: Reaction network from Ranzi et al. [21]. Hemicellulose assumed to be xylan-rich based on the conclusions of Peng and Wu [52].

| Group         | # |                                                                                                                                                                                                                                                                            | E <sub>a</sub><br>(kJ/mol) | log <sub>10</sub> [A<br>(s <sup>-1</sup> )] | T <sup>n</sup> |
|---------------|---|----------------------------------------------------------------------------------------------------------------------------------------------------------------------------------------------------------------------------------------------------------------------------|----------------------------|---------------------------------------------|----------------|
| Cellulose     | 1 | CELL → CELLA                                                                                                                                                                                                                                                               | 196.46                     | 14.18                                       | 0              |
|               | 2 | CELLA → 0.4 HAA + 0.05 GLYOXAL + 0.15 ACETALDY + 0.25 HMF + 0.35 NPROPALD + 0.15 METHANOL + 0.3 FORMALDY + 0.61 CO + 0.36 CO <sub>2</sub> + 0.05 H <sub>2</sub> + 0.93 WATER + 0.02 FORMICAC + 0.05 GCH <sub>4</sub> + 0.05 GH <sub>2</sub> + 0.61 C                       | 79.84                      | 6.41                                        | 0              |
|               | 3 | CELLA → LEVOGLUC                                                                                                                                                                                                                                                           | 41.80                      | 0.52                                        | 1              |
|               | 4 | CELL → 5 WATER + 6 C                                                                                                                                                                                                                                                       | 129.58                     | 7.78                                        | 0              |
| Hemicellulose | 1 | XYHW → 0.35 HEM1 + 0.65 HEM2                                                                                                                                                                                                                                               | 119.13                     | 10.00                                       | 0              |
|               | 2 | HEM1 → 0.6 XYLOSAN + 0.2 ACETOL + 0.12 GLYOXAL + 0.2 FURFURAL + 0.4 WATER + 0.08 GH <sub>2</sub> + 0.16 CO                                                                                                                                                                 | 45.98                      | 0.48                                        | 1              |
|               | 3 | HEM1 → 0.4 WATER + 0.79 CO <sub>2</sub> + 0.05 FORMICAC + 0.69 CO + 0.01 GCO + 0.01 GCO <sub>2</sub> + 0.35 GH <sub>2</sub> + 0.3 FORMALDY + 0.9 GCOH <sub>2</sub> + 0.625 GCH <sub>4</sub> + 0.375 GC <sub>2</sub> H <sub>4</sub> + 0.875 C                               | 12.54                      | -2.74                                       | 1              |
|               | 4 | HEM2 → 0.2 WATER + 0.275 CO + 0.275 CO <sub>2</sub> + 0.5 FORMALDY + 0.1 ETHANOL + 0.05 HAA + 0.35 ACETICAC + 0.025 FORMICAC + 0.25 GCH <sub>4</sub> + 0.3 GCH <sub>3</sub> OH + 0.225 GC <sub>2</sub> H <sub>4</sub> + 0.4 GCO <sub>2</sub> + 0.725 GCOH <sub>2</sub> + C | 131.67                     | 9.70                                        | 0              |
| Lignin        | 1 | LIGNIN-C → 0.35 LIGN-CC + 0.1 CMRYLALC + 0.08 PHENOL + 0.41 C <sub>2</sub> H <sub>4</sub> + WATER + 0.7 GCOH <sub>2</sub> + 0.3 FORMALDY + 0.32 CO + 0.495 GCH <sub>4</sub> + 5.735 C                                                                                      | 155.50                     | 11.00                                       | 0              |
|               | 2 | LIGNIN-H → LIGN-OH + 0.5 NPROPALD + 0.5 C <sub>2</sub> H <sub>4</sub> + 0.25 HAA                                                                                                                                                                                           | 156.75                     | 12.83                                       | 0              |
|               | 3 | LIGNIN-O → LIGN-OH + CO <sub>2</sub>                                                                                                                                                                                                                                       | 106.59                     | 8.52                                        | 0              |
|               | 4 | LIGN-CC → 0.3 CMRYLALC + 0.2 PHENOL + 0.35 HAA + 0.7 WATER + 0.65 GCH <sub>4</sub> + 0.6 GC <sub>2</sub> H <sub>4</sub> + GCOH <sub>2</sub> + 0.4 CO + 0.4 GCO + 6.75 C                                                                                                    | 103.66                     | 4.00                                        | 0              |
|               | 5 | LIGN-OH → LIG + 0.9 WATER + 0.1 CH <sub>4</sub> + 0.6 METHANOL + 0.1 GH <sub>2</sub> + 0.3 GCH <sub>3</sub> OH + 0.05 CO <sub>2</sub> + 0.55 CO + 0.6 GCO + 0.05 FORMICAC + 0.85 GCOH <sub>2</sub> + 0.35 GCH <sub>4</sub> + 0.2 GC <sub>2</sub> H <sub>4</sub> + 4.15 C   | 125.40                     | 8.00                                        | 0              |
|               | 6 | LIG → 0.7 SYNAPALD + 0.3 ANISOLE + 0.3 CO + 0.3 GCO + 0.3 ACETALDY                                                                                                                                                                                                         | 50.16                      | 0.60                                        | 1              |
|               | 7 | LIG → 0.6 WATER + 0.4 CO + 0.2 CH <sub>4</sub> + 0.4 FORMALDY + 0.2 GCO + 0.4 GCH <sub>4</sub> + 0.5 GC <sub>2</sub> H <sub>4</sub> + 0.4 GCH <sub>3</sub> OH + 2 GCOH <sub>2</sub> + 6 C                                                                                  | 33.44                      | -1.08                                       | 1              |
|               | 8 | LIG → 0.6 WATER + 2.6 CO + 1.1 CH <sub>4</sub> + 0.4 FORMALDY + C <sub>2</sub> H <sub>4</sub> + 0.4 METHANOL                                                                                                                                                               | 101.57                     | 7.00                                        | 0              |
| Extractives   | 1 | TGL → ACROLEIN + 3 FFA                                                                                                                                                                                                                                                     | 191.03                     | 12.85                                       | 0              |
|               | 2 | TANN → PHENOL + ITANN                                                                                                                                                                                                                                                      | 41.80                      | 1.30                                        | 0              |
|               | 3 | ITANN → 6 C + 3 CO + 3 WATER                                                                                                                                                                                                                                               | 104.50                     | 3.00                                        | 0              |

Table S20: Reaction network from Debiagi et al. [22]. In reaction 1 of hemicellulose, first set of values assumes xylan-rich hemicellulose, based on the conclusions of Peng and Wu [52], while second set assumes cereal structure.

| Group         | # |                                                                                                                                                                                                                                                                                                                                                                                                                                    | E <sub>a</sub><br>(kJ/mol) | log <sub>10</sub> [A<br>(s <sup>-1</sup> )] | T <sup>n</sup> |
|---------------|---|------------------------------------------------------------------------------------------------------------------------------------------------------------------------------------------------------------------------------------------------------------------------------------------------------------------------------------------------------------------------------------------------------------------------------------|----------------------------|---------------------------------------------|----------------|
| Cellulose     | 1 | CELL → CELLA                                                                                                                                                                                                                                                                                                                                                                                                                       | 196.46                     | 14.18                                       | 0              |
|               | 2 | CELLA → 0.05 3HYDPROP + 0.4 HAA + 0.03 GLYOXAL + 0.17 ACETALDY + 0.25 HMF + 0.35 NPROPALD + 0.2 METHANOL + 0.15 FORMALDY + 0.49CO + 0.43CO <sub>2</sub> + 0.13H <sub>2</sub> + 0.93 WATER + 0.02 FORMICAC + 0.05 CH <sub>4</sub> + 0.66 C + 0.05 GCO + 0.05 GCOH <sub>2</sub> L + 0.1 GH <sub>2</sub>                                                                                                                              | 79.84                      | 6.40                                        | 0              |
|               | 3 | CELLA → LEVOGLUC                                                                                                                                                                                                                                                                                                                                                                                                                   | 41.80                      | 0.52                                        | 1              |
|               | 4 | CELL → 0.125 H <sub>2</sub> + 4.45 WATER + 5.45 C + 0.12 GCOH <sub>2</sub> S + 0.25 GCO + 0.18 GCOH <sub>2</sub> L + 0.125 GH <sub>2</sub>                                                                                                                                                                                                                                                                                         | 129.58                     | 7.95                                        | 0              |
| Hemicellulose | 1 | XYHW → 0.35/0.12 HEM1 + 0.65/0.88 HEM2                                                                                                                                                                                                                                                                                                                                                                                             | 131.25                     | 11.10                                       | 0              |
|               | 2 | HEM1 → 0.06 3HYDPROP + 0.16 FURFURAL + 0.1 GLYOXAL + 0.13 HMF + 0.09 CO <sub>2</sub> + 0.02 H <sub>2</sub> + 0.54 WATER + 0.25 LEVOGLUC + 0.1 CH <sub>4</sub> + 0.25 XYLOSAN + 0.1 C                                                                                                                                                                                                                                               | 53.92                      | 1.20                                        | 1              |
|               | 3 | HEM1 → 0.4 FORMALDY + 0.49 CO + 0.39 CO <sub>2</sub> + 0.1 H <sub>2</sub> + 0.4 WATER + 0.05 FORMICAC + 0.1 C <sub>2</sub> H <sub>4</sub> + 0.3 CH <sub>4</sub> + 0.975 C + 0.37GCOH <sub>2</sub> S + 0.51 GCO <sub>2</sub> + 0.01 GCO + 0.325 GCH <sub>4</sub> + 0.075 GC <sub>2</sub> H <sub>4</sub> + 0.43 GCOH <sub>2</sub> L + 0.05 GH <sub>2</sub> + 0.2 GC <sub>2</sub> H <sub>6</sub>                                      | 15.05                      | -2.52                                       | 1              |
|               | 4 | HEM2 → 0.145 FURFURAL + 0.105 ACETICAC + 0.035 HAA + 0.3 CO + 0.5125 CO <sub>2</sub> + 0.5505 H <sub>2</sub> + 0.056 WATER + 0.0175 FORMICAC + 0.049 ETHANOL + 0.1895 CH <sub>4</sub> + 0.7125 C + 0.78 GCOH <sub>2</sub> S + 0.45 GCO <sub>2</sub> + 0.105 GCH <sub>3</sub> OH + 0.05 GCH <sub>4</sub> + 0.1GC <sub>2</sub> H <sub>4</sub> + 0.18 GCOH <sub>2</sub> L + 0.21 GH <sub>2</sub> + 0.2 GC <sub>2</sub> H <sub>6</sub> | 127.49                     | 9.85                                        | 0              |
| Lignin        | 1 | LIGC → 0.1 ANISOLE + 0.22 FORMALDY + 0.21 CO + 0.1 CO <sub>2</sub> + WATER + 0.27 C <sub>2</sub> H <sub>4</sub> + 0.1 VANILLIN + 0.35 LIGCC + 5.85 C + 0.4 GCOH <sub>2</sub> S + 0.36 GCH <sub>4</sub> + 0.17 GCOH <sub>2</sub> L + 0.1 GH <sub>2</sub> + 0.2 GC <sub>2</sub> H <sub>6</sub>                                                                                                                                       | 155.50                     | 11.00                                       | 0              |
|               | 2 | LIGH → 0.2 HAA + 0.5 NPROPALD + 0.1 CO + 0.4 C <sub>2</sub> H <sub>4</sub> + 0.1 C <sub>2</sub> H <sub>6</sub> + LIGO                                                                                                                                                                                                                                                                                                              | 156.75                     | 12.83                                       | 0              |
|               | 3 | LIGO → LIGO                                                                                                                                                                                                                                                                                                                                                                                                                        | 106.59                     | 8.52                                        | 0              |
|               | 4 | LIGCC → 0.15 ANISOLE + 0.35 HAA + 1.15 CO + 0.7 H <sub>2</sub> + 0.7 WATER + 0.3 C <sub>2</sub> H <sub>4</sub> + 0.45 CH <sub>4</sub> + 0.25 VANILLIN + 0.15 CRESOL + 0.4 C <sub>2</sub> H <sub>6</sub> + 6.8 C + 0.4 GCO                                                                                                                                                                                                          | 103.66                     | 4.00                                        | 0              |
|               | 5 | LIGO → 0.025 HMWL + 0.1 ACROLEIN + 0.6 CH <sub>3</sub> OH + 0.65 CO + 0.05 CO <sub>2</sub> + WATER + 0.05 FORMICAC + 0.1 CH <sub>4</sub> + 0.9 LIG + 4.25 C + 0.4 GCOH <sub>2</sub> S + 0.6 GCO + 0.3 GCH <sub>3</sub> OH + 0.25 GCH <sub>4</sub> + 0.1 GC <sub>2</sub> H <sub>4</sub> + 0.45 GCOH <sub>2</sub> L + 0.15 GC <sub>2</sub> H <sub>6</sub>                                                                            | 125.40                     | 8.00                                        | 0              |
|               | 6 | LIG → 0.1 ANISOLE + 0.3 ACETALDY + 0.6 CO + 0.5 C <sub>2</sub> H <sub>4</sub> + VANILLIN + 0.1 C                                                                                                                                                                                                                                                                                                                                   | 50.16                      | 0.60                                        | 1              |
|               | 7 | LIG → 0.4 METHANOL + 0.4 FORMALDY + 2.6 CO + 0.6 WATER + 0.75 C <sub>2</sub> H <sub>4</sub> + 0.6 CH <sub>4</sub> + 0.5 C <sub>2</sub> H <sub>6</sub> + 4.5 C                                                                                                                                                                                                                                                                      | 131.67                     | 9.18                                        | 0              |
|               | 8 | LIG → 0.4 FORMALDY + 0.3 CO + 0.1 CO <sub>2</sub> + 0.6 WATER + 0.2 CH <sub>4</sub> + 6.1 C + 0.65 GCOH <sub>2</sub> L + 0.2 GCO + 0.4 GCH <sub>3</sub> OH + 0.4 GCH <sub>4</sub> + 0.5 GC <sub>2</sub> H <sub>4</sub> + 1.25 GCOH <sub>2</sub> L + 0.1 GH <sub>2</sub>                                                                                                                                                            | 33.44                      | -1.08                                       | 1              |
| Extractives   | 1 | TGL → ACROLEIN + 0.5 U2ME12 + 2.5 MLINO                                                                                                                                                                                                                                                                                                                                                                                            | 191.03                     | 12.85                                       | 0              |
|               | 2 | TANN → WATER + 0.85 PHENOL + ITANN + GCO + 0.15 GC <sub>6</sub> H <sub>5</sub> OH                                                                                                                                                                                                                                                                                                                                                  | 41.80                      | 1.30                                        | 0              |
|               | 3 | ITANN → 2 CO + WATER + 5 C + 0.45 GCOH <sub>2</sub> S + 0.55 GCOH <sub>2</sub> L                                                                                                                                                                                                                                                                                                                                                   | 104.50                     | 3.00                                        | 0              |

When considering the modifications by Trendewicz et al. [25], replace the cellulose portion of the aforementioned reaction networks with the following shown in Table . Only the energies of activation change, all other parameters stay the same.

Table S21: Reaction network from Trendewicz et al. [25] for the degradation of cellulose. ‘Beech’ represents a potassium content of 0.13 wt.% and ‘Wheat Straw’ represents a potassium content of 1.21 wt.%.

| Group     | # |                                                                                                                                                                                                                                                                                                                                                                                                             | Beech             | Wheat Straw       | $\log_{10}[A]$<br>( $s^{-1}$ ) | $T^n$ |
|-----------|---|-------------------------------------------------------------------------------------------------------------------------------------------------------------------------------------------------------------------------------------------------------------------------------------------------------------------------------------------------------------------------------------------------------------|-------------------|-------------------|--------------------------------|-------|
|           |   |                                                                                                                                                                                                                                                                                                                                                                                                             | $E_a$<br>(kJ/mol) | $E_a$<br>(kJ/mol) |                                |       |
| Cellulose | 1 | Stays from original network                                                                                                                                                                                                                                                                                                                                                                                 |                   |                   |                                |       |
|           | 2 | $CELLA \rightarrow 0.05 \text{ 3HYDPROP} + 0.4 \text{ HAA} + 0.03 \text{ GLYOXAL} + 0.17 \text{ ACETALDY} + 0.25 \text{ HMF} + 0.35 \text{ NPROPALD} + 0.2 \text{ METHANOL} + 0.15 \text{ FORMALDY} + 0.49 \text{ CO} + 0.43 \text{ CO}_2 + 0.13 \text{ H}_2 + 0.93 \text{ WATER} + 0.02 \text{ FORMICAC} + 0.05 \text{ CH}_4 + 0.66 \text{ C} + 0.05 \text{ GCO} + 0.05 \text{ GCOH2L} + 0.1 \text{ GH}_2$ | 96.80             | 100.48            | 9.58                           | 0     |
|           | 3 | $CELLA \rightarrow \text{LEVOGLUC}$                                                                                                                                                                                                                                                                                                                                                                         | 106.20            | 120.27            | 9.42                           | 0     |
|           | 4 | $CELL \rightarrow 0.125 \text{ H}_2 + 4.45 \text{ WATER} + 5.45 \text{ C} + 0.12 \text{ GCOH2S} + 0.25 \text{ GCO} + 0.18 \text{ GCOH2L} + 0.125 \text{ GH}_2$                                                                                                                                                                                                                                              | 132.34            | 123.81            | 9.30                           | 0     |

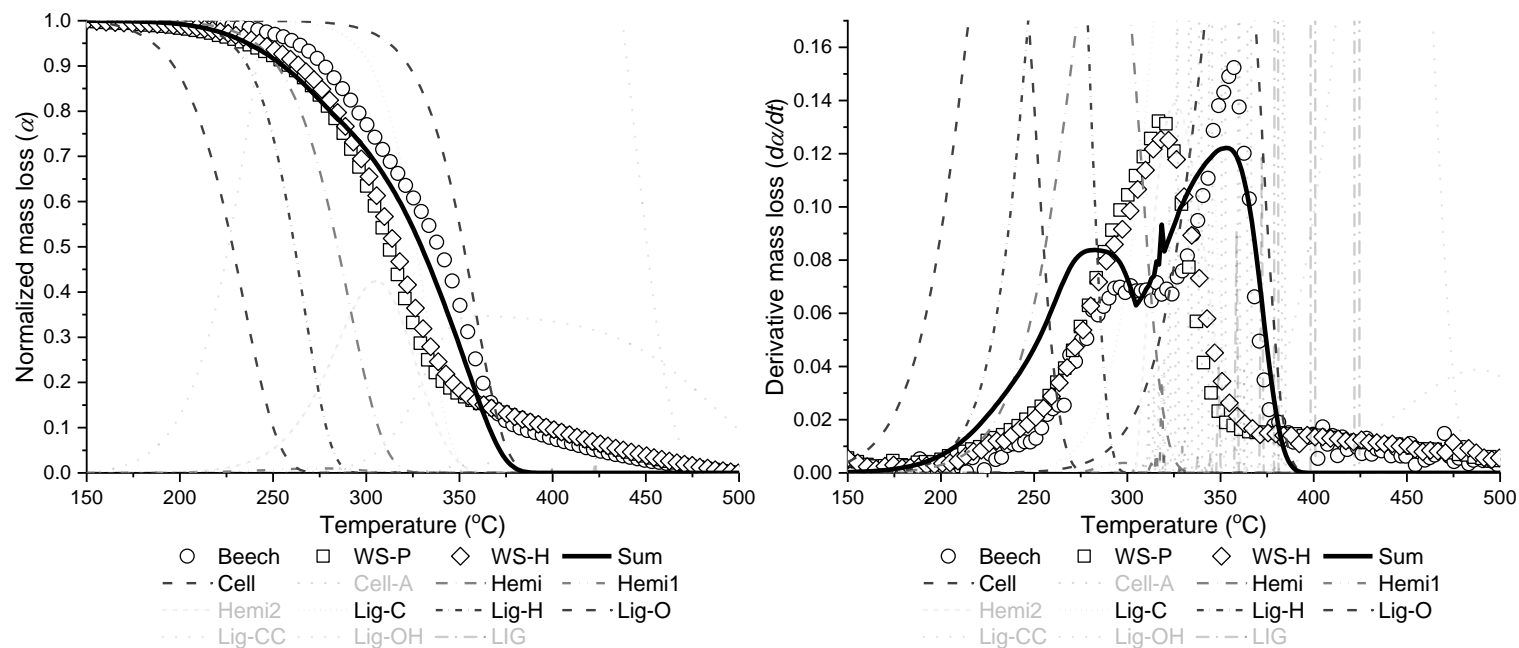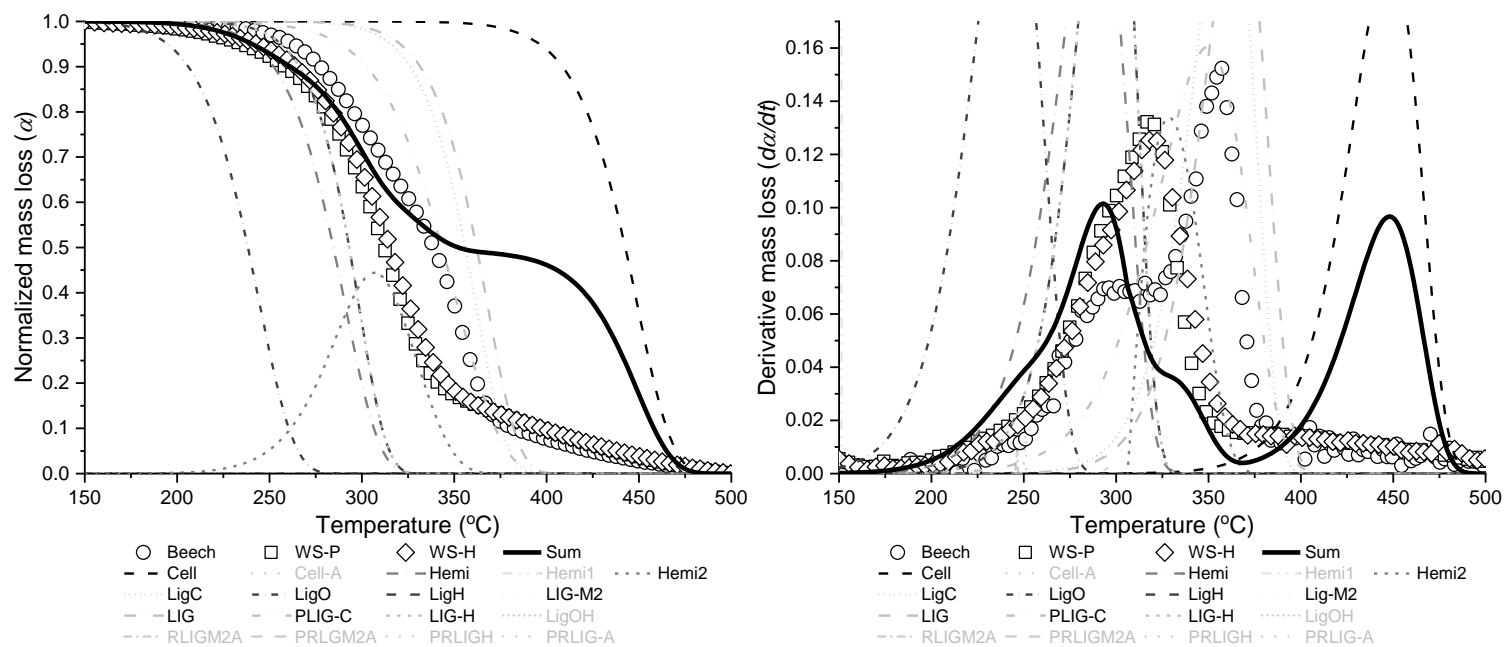

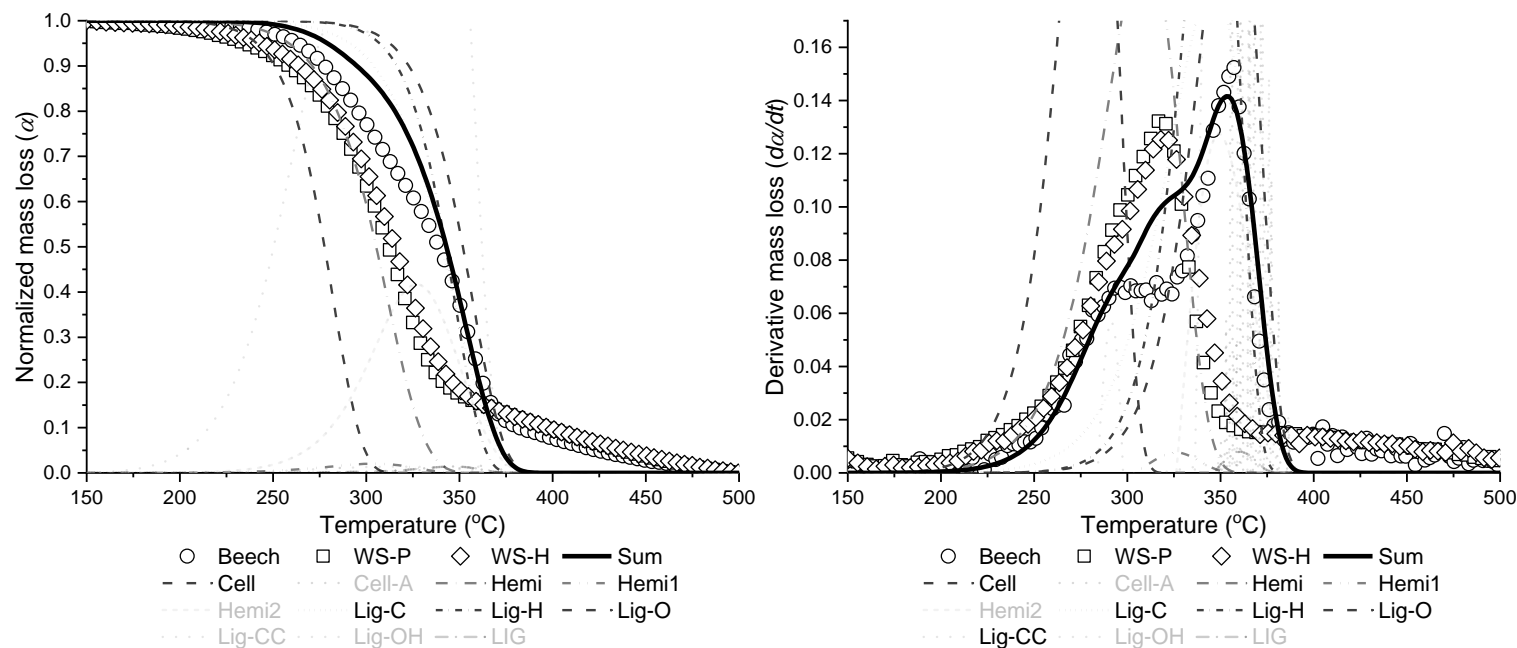

Figure S21: Comparison of the degradation profiles of the feedstocks (10 K/min) with the decomposition patterns by Corbetta et al. [19]: mass loss (left) and derivative mass loss (right).

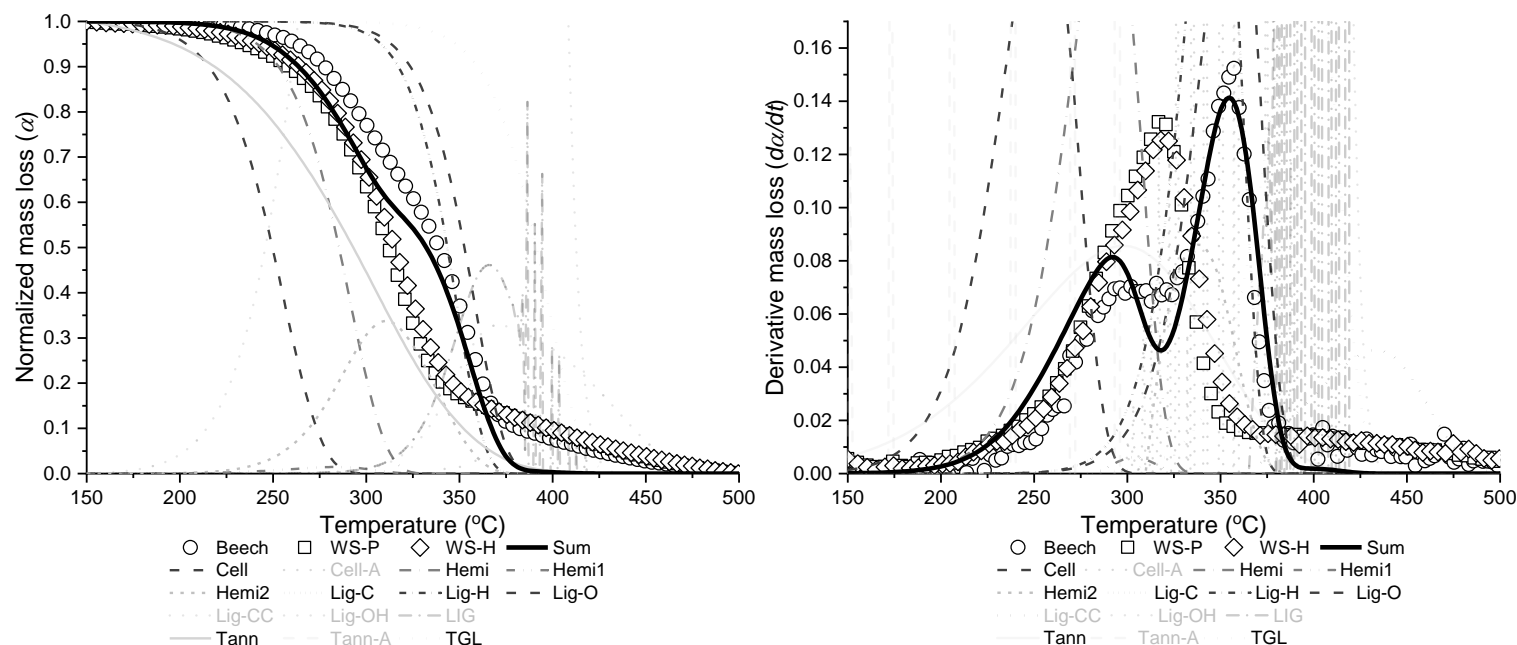

Figure S22: Comparison of the degradation profiles of the feedstocks (10 K/min) with the decomposition patterns by Anca-Couce and Scharler [12]: mass loss (left) and derivative mass loss (right).



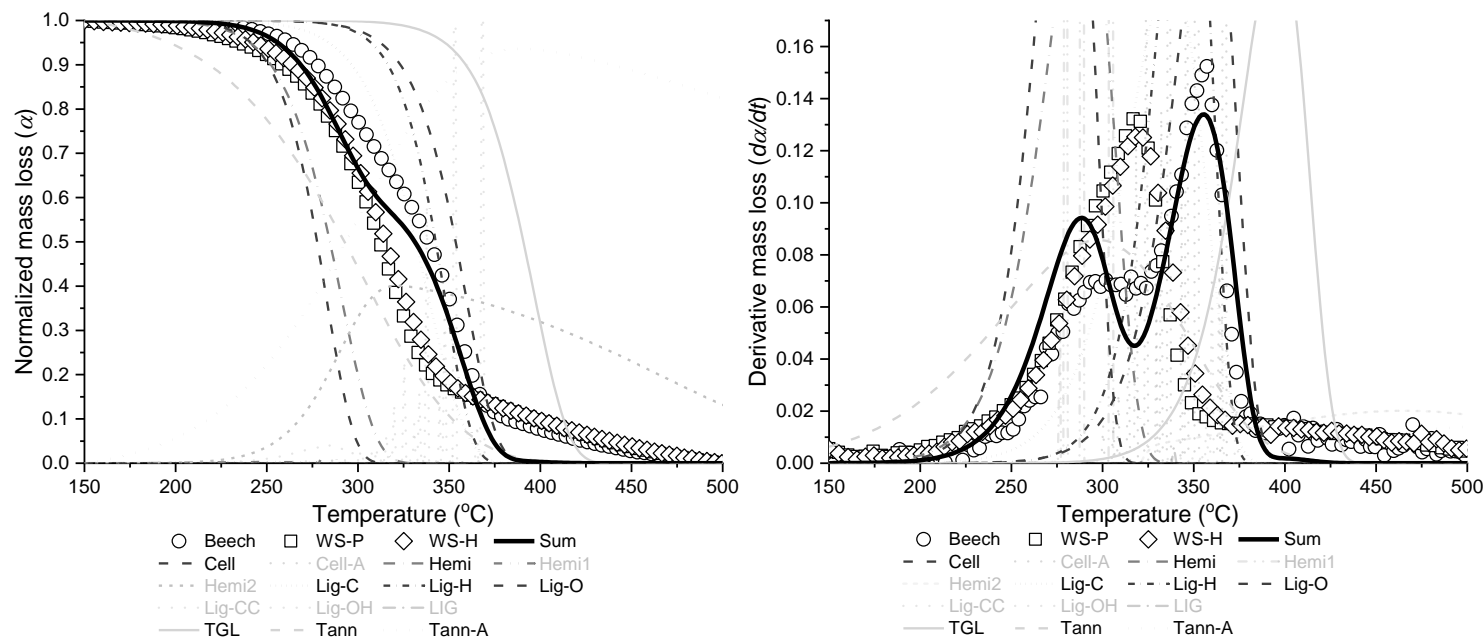

Figure S23: Comparison of the degradation profiles of the feedstocks (10 K/min) with the decomposition patterns by Ranzi et al. (2017a) [20]: mass loss (left) and derivative mass loss (right). Hemicellulose assumed to be xylan-rich based on the conclusions of Peng and Wu [52].

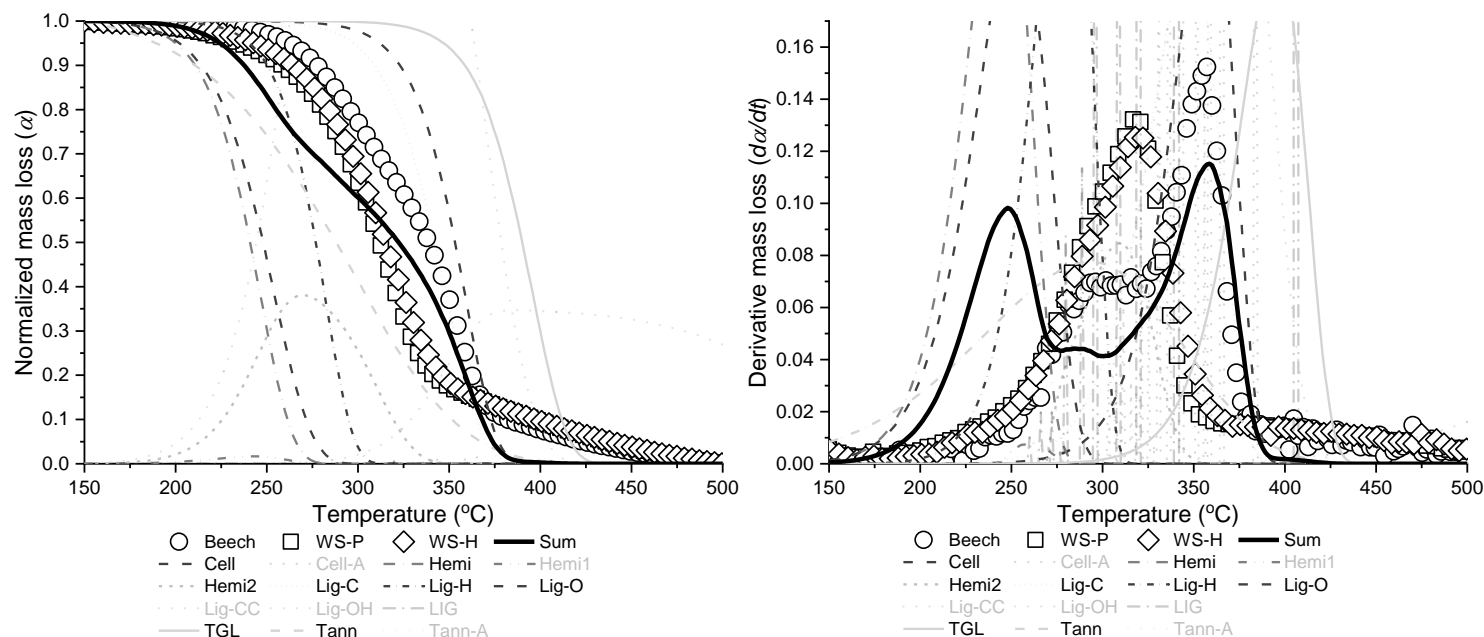

Figure S24: Comparison of the degradation profiles of the feedstocks (10 K/min) with the decomposition patterns by Ranzi et al. (2017b) [21]: mass loss (left) and derivative mass loss (right). Hemicellulose assumed to be xylan-rich based on the conclusions of Peng and Wu [52].



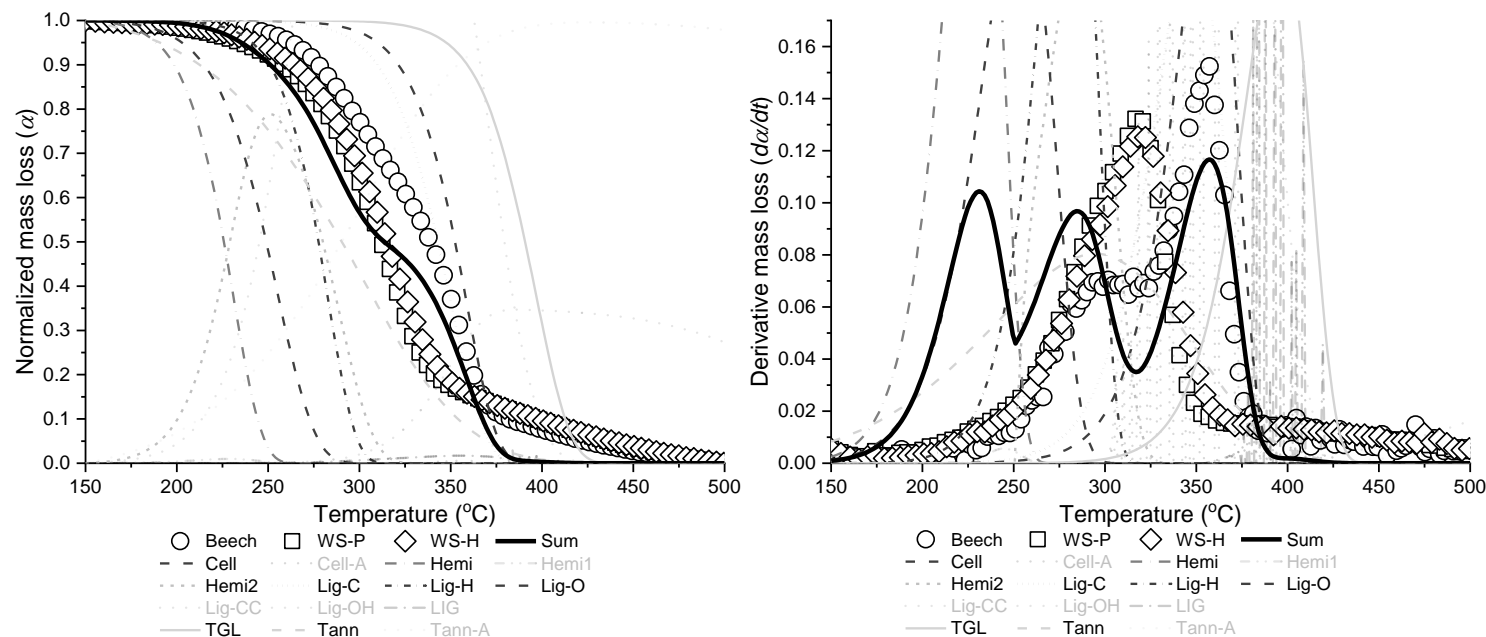

Figure S25: Comparison of the degradation profiles of the feedstocks (10 K/min) with the decomposition patterns by Debiagi et al. [22]: mass loss (left) and derivative mass loss (right). Hemicellulose assumed to be xylan-rich based on the conclusions of Peng and Wu [52].

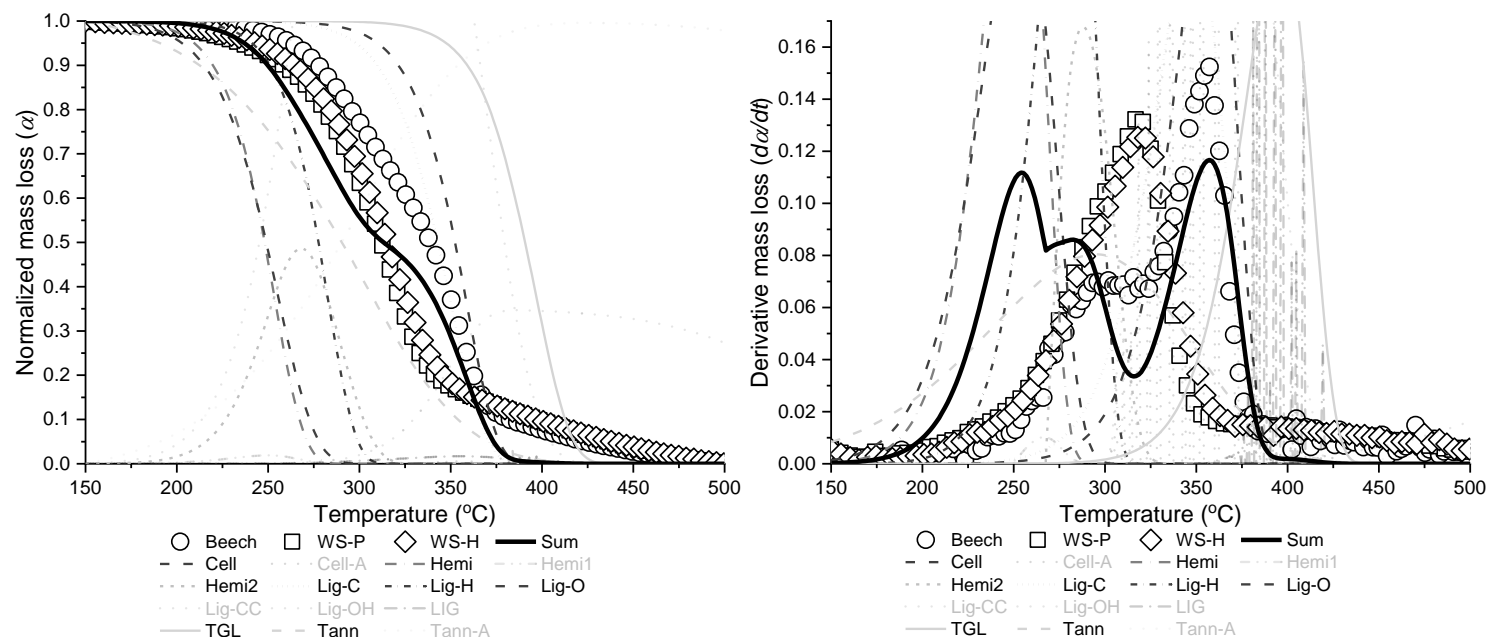

Figure S26: Comparison of the degradation profiles of the feedstocks (10 K/min) with the decomposition patterns by Debiagi et al. [22]: mass loss (left) and derivative mass loss (right). Hemicellulose assumed to be cereal-type.
